# Supplementary material
Source: publisher figshare collection journal article supplement (https://gsajournals.figshare.com/ndownloader/files/14964725)
Supplement: Supplementary file 1 [file 14964725]

## Sheet: PACs
Chromosome	Cluster_start	Cluster_end	Strand	PAC	PAC_reads	Cluster_reads	Region	GeneID	TranscriptID	Distance_from_NearestGene	Transcript_StartEnd	Gene_StartEnd	Ensembl_Transcript_3UTR_length	Gene_biotype	Cluster_size	Number_CleavageSites
10	121917	121917	-	121917	3	3	intergenic	Zm00001d023210	Zm00001d023210_T001	96864	218781-220384	218781-220384	0	protein_coding	1	1
10	218442	218442	-	218442	3	3	extended	Zm00001d023210	Zm00001d023210_T001	339	218781-220384	218781-220384	0	protein_coding	1	1
10	218519	218521	-	218519	3	6	extended	Zm00001d023210	Zm00001d023210_T001	262	218781-220384	218781-220384	0	protein_coding	3	2
10	398060	398078	-	398078	23	46	extended	Zm00001d023213	Zm00001d023213_T001	75	398153-399736	398153-399736	0	protein_coding	19	3
10	600990	601025	-	601004	106	256	extended	Zm00001d023216	Zm00001d023216_T001	184	601188-602564	601188-602564	0	protein_coding	36	9
10	687842	687842	-	687842	3	3	intergenic	Zm00001d023220	Zm00001d023220_T001	12567	700409-703173	700409-703173	157	protein_coding	1	1
10	700323	700323	-	700323	4	4	extended	Zm00001d023220	Zm00001d023220_T001	86	700409-703173	700409-703173	157	protein_coding	1	1
10	700413	700415	-	700415	7	12	3UTR	Zm00001d023220	Zm00001d023220_T001	0	700409-703173	700409-703173	157	protein_coding	3	2
10	703587	703587	-	703587	7	7	intergenic	Zm00001d023222	Zm00001d023222_T001	3137	706724-712890	706724-712890	414	protein_coding	1	1
10	703626	703698	-	703652	84	316	intergenic	Zm00001d023222	Zm00001d023222_T001	3072	706724-712890	706724-712890	414	protein_coding	73	20
10	703746	703746	-	703746	3	3	intergenic	Zm00001d023222	Zm00001d023222_T001	2978	706724-712890	706724-712890	414	protein_coding	1	1
10	703837	703861	-	703837	20	30	intergenic	Zm00001d023222	Zm00001d023222_T001	2887	706724-712890	706724-712890	414	protein_coding	25	3
10	706811	706843	-	706843	11	34	3UTR	Zm00001d023222	Zm00001d023222_T001	0	706724-712890	706724-712890	414	protein_coding	33	4
10	706886	707013	-	706923	474	2044	3UTR	Zm00001d023222	Zm00001d023222_T001	0	706724-712890	706724-712890	414	protein_coding	128	46
10	707048	707048	-	707048	6	6	3UTR	Zm00001d023222	Zm00001d023222_T001	0	706724-712890	706724-712890	414	protein_coding	1	1
10	712097	712100	-	712100	4	7	intron	Zm00001d023222	Zm00001d023222_T001	0	706724-712890	706724-712890	414	protein_coding	4	2
10	712193	712193	-	712193	8	8	intron	Zm00001d023222	Zm00001d023222_T001	0	706724-712890	706724-712890	414	protein_coding	1	1
10	823795	823795	-	823795	10	10	extended	Zm00001d023223	Zm00001d023223_T001	83	823878-825894	823878-825894	188	protein_coding	1	1
10	823862	823935	-	823882	626	2480	3UTR	Zm00001d023223	Zm00001d023223_T001	0	823878-825894	823878-825894	188	protein_coding	74	35
10	826466	826466	-	826466	3	3	3UTR	Zm00001d023225	Zm00001d023225_T001	0	826372-828398	826372-828398	275	protein_coding	1	1
10	832681	832681	-	832681	5	5	3UTR	Zm00001d023226	Zm00001d023226_T001	0	832658-846476	832658-846476	345	protein_coding	1	1
10	832712	832712	-	832712	10	10	3UTR	Zm00001d023226	Zm00001d023226_T001	0	832658-846476	832658-846476	345	protein_coding	1	1
10	832745	832745	-	832745	3	3	3UTR	Zm00001d023226	Zm00001d023226_T001	0	832658-846476	832658-846476	345	protein_coding	1	1
10	832809	832820	-	832813	15	36	3UTR	Zm00001d023226	Zm00001d023226_T001	0	832658-846476	832658-846476	345	protein_coding	12	5
10	832846	832867	-	832867	6	11	3UTR	Zm00001d023226	Zm00001d023226_T001	0	832658-846476	832658-846476	345	protein_coding	22	2
10	833195	833195	-	833195	4	4	intron	Zm00001d023226	Zm00001d023226_T001	0	832658-846476	832658-846476	345	protein_coding	1	1
10	954657	954801	-	954801	184	975	3UTR	Zm00001d023230	Zm00001d023230_T005	0	954685-966579	954679-966602	595	protein_coding	145	35
10	954903	954952	-	954903	20	40	3UTR	Zm00001d023230	Zm00001d023230_T005	0	954685-966579	954679-966602	595	protein_coding	50	5
10	954988	954988	-	954988	7	7	3UTR	Zm00001d023230	Zm00001d023230_T005	0	954685-966579	954679-966602	595	protein_coding	1	1
10	965608	965608	-	965608	3	3	intron	Zm00001d023230	Zm00001d023230_T005	0	954685-966579	954679-966602	595	protein_coding	1	1
10	965642	965642	-	965642	7	7	intron	Zm00001d023230	Zm00001d023230_T005	0	954685-966579	954679-966602	595	protein_coding	1	1
10	1047172	1047172	-	1047172	3	3	intergenic	Zm00001d023237	Zm00001d023237_T001	49724	1096896-1100874	1096896-1100874	323	protein_coding	1	1
10	1048619	1048627	-	1048627	17	21	intergenic	Zm00001d023237	Zm00001d023237_T001	48269	1096896-1100874	1096896-1100874	323	protein_coding	9	2
10	1096864	1097020	-	1096976	317	1354	3UTR	Zm00001d023237	Zm00001d023237_T001	0	1096896-1100874	1096896-1100874	323	protein_coding	157	35
10	1097088	1097120	-	1097101	27	79	3UTR	Zm00001d023237	Zm00001d023237_T001	0	1096896-1100874	1096896-1100874	323	protein_coding	33	6
10	1292386	1292386	-	1292386	5	5	3UTR	Zm00001d023242	Zm00001d023242_T001	0	1292263-1294372	1292263-1294372	533	protein_coding	1	1
10	1292642	1292645	-	1292642	26	36	3UTR	Zm00001d023242	Zm00001d023242_T001	0	1292263-1294372	1292263-1294372	533	protein_coding	4	2
10	1295329	1295329	-	1295329	4	4	extended	Zm00001d023243	Zm00001d023243_T003	49	1295378-1301629	1295378-1301629	292	protein_coding	1	1
10	1295376	1295431	-	1295395	48	217	3UTR	Zm00001d023243	Zm00001d023243_T003	0	1295378-1301629	1295378-1301629	292	protein_coding	56	10
10	1295493	1295495	-	1295495	15	19	3UTR	Zm00001d023243	Zm00001d023243_T003	0	1295378-1301629	1295378-1301629	292	protein_coding	3	2
10	1445552	1445552	-	1445552	3	3	extended	Zm00001d023246	Zm00001d023246_T001	44	1445596-1448353	1445596-1448353	19	protein_coding	1	1
10	1461165	1461199	-	1461195	76	258	3UTR	Zm00001d023249	Zm00001d023249_T001	0	1461166-1464360	1461166-1464360	226	protein_coding	35	10
10	1461228	1461300	-	1461280	18	85	3UTR	Zm00001d023249	Zm00001d023249_T001	0	1461166-1464360	1461166-1464360	226	protein_coding	73	12
10	1461338	1461338	-	1461338	4	4	3UTR	Zm00001d023249	Zm00001d023249_T001	0	1461166-1464360	1461166-1464360	226	protein_coding	1	1
10	1468090	1468090	-	1468090	5	5	extended	Zm00001d023037	Zm00001d023037_T001	33	1468123-1468421	1468123-1468421	0	lincRNA	1	1
10	1497501	1497694	-	1497608	51	351	3UTR	Zm00001d023258	Zm00001d023258_T001	0	1497523-1503954	1497523-1503954	314	protein_coding	194	30
10	1506351	1506354	-	1506352	108	123	3UTR	Zm00001d023260	Zm00001d023260_T002	0	1506335-1515689	1506335-1515689	430	protein_coding	4	3
10	1506386	1506578	-	1506519	245	1343	3UTR	Zm00001d023260	Zm00001d023260_T002	0	1506335-1515689	1506335-1515689	430	protein_coding	193	44
10	1565518	1565532	-	1565528	10	21	3UTR	Zm00001d023262	Zm00001d023262_T005	0	1565402-1599319	1565392-1599381	269	protein_coding	15	3
10	1591205	1591245	-	1591223	109	256	intron	Zm00001d023262	Zm00001d023262_T005	0	1565402-1599319	1565392-1599381	269	protein_coding	41	12
10	1591304	1591324	-	1591304	16	24	intron	Zm00001d023262	Zm00001d023262_T005	0	1565402-1599319	1565392-1599381	269	protein_coding	21	3
10	1594383	1594383	-	1594383	4	4	intron	Zm00001d023262	Zm00001d023262_T005	0	1565402-1599319	1565392-1599381	269	protein_coding	1	1
10	1606003	1606009	-	1606009	5	9	3UTR	Zm00001d023265	Zm00001d023265_T002	0	1606001-1612705	1606001-1612705	380	protein_coding	7	2
10	1606154	1606154	-	1606154	5	5	3UTR	Zm00001d023265	Zm00001d023265_T002	0	1606001-1612705	1606001-1612705	380	protein_coding	1	1
10	1611941	1611941	-	1611941	3	3	5UTR	Zm00001d023265	Zm00001d023265_T002	0	1606001-1612705	1606001-1612705	380	protein_coding	1	1
10	1680916	1680916	-	1680916	4	4	3UTR	Zm00001d023267	Zm00001d023267_T001	0	1680751-1687113	1680751-1687113	554	protein_coding	1	1
10	1680942	1681007	-	1680942	6	27	3UTR	Zm00001d023267	Zm00001d023267_T001	0	1680751-1687113	1680751-1687113	554	protein_coding	66	6
10	1686182	1686182	-	1686182	3	3	intron	Zm00001d023267	Zm00001d023267_T001	0	1680751-1687113	1680751-1687113	554	protein_coding	1	1
10	1687930	1687930	-	1687930	5	5	intergenic	ENSRNA049450934	ENSRNA049450934-T1	1640	1689570-1689643	1689570-1689643	0	tRNA	1	1
10	1690266	1690266	-	1690266	8	8	intergenic	ENSRNA049450934	ENSRNA049450934-T1	696	1689570-1689643	1689570-1689643	0	tRNA	1	1
10	1693617	1693623	-	1693617	6	10	intergenic	ENSRNA049450934	ENSRNA049450934-T1	4047	1689570-1689643	1689570-1689643	0	tRNA	7	2
10	1693661	1693670	-	1693666	64	126	intergenic	ENSRNA049450934	ENSRNA049450934-T1	4096	1689570-1689643	1689570-1689643	0	tRNA	10	5
10	1693713	1693748	-	1693743	16	67	intergenic	ENSRNA049450934	ENSRNA049450934-T1	4173	1689570-1689643	1689570-1689643	0	tRNA	36	6
10	1698059	1698059	-	1698059	8	8	extended	Zm00001d023269	Zm00001d023269_T001	277	1698336-1698995	1698336-1698995	0	protein_coding	1	1
10	1698105	1698105	-	1698105	5	5	extended	Zm00001d023269	Zm00001d023269_T001	231	1698336-1698995	1698336-1698995	0	protein_coding	1	1
10	1698152	1698152	-	1698152	4	4	extended	Zm00001d023269	Zm00001d023269_T001	184	1698336-1698995	1698336-1698995	0	protein_coding	1	1
10	1785758	1785931	-	1785881	125	1192	3UTR	Zm00001d023271	Zm00001d023271_T002	0	1785760-1789535	1785760-1789535	370	protein_coding	174	44
10	1785992	1786022	-	1785992	6	14	3UTR	Zm00001d023271	Zm00001d023271_T002	0	1785760-1789535	1785760-1789535	370	protein_coding	31	3
10	1786089	1786089	-	1786089	5	5	3UTR	Zm00001d023271	Zm00001d023271_T002	0	1785760-1789535	1785760-1789535	370	protein_coding	1	1
10	1982255	1982255	-	1982255	4	4	intergenic	Zm00001d023275	Zm00001d023275_T001	8497	1973758-1978869	1973758-1978869	290	protein_coding	1	1
10	2014836	2014926	-	2014868	101	204	intergenic	Zm00001d023276	Zm00001d023276_T001	8476	2006392-2006477	2006392-2006477	0	tRNA	91	15
10	2014968	2015027	-	2014997	20	98	intergenic	Zm00001d023276	Zm00001d023276_T001	8605	2006392-2006477	2006392-2006477	0	tRNA	60	12
10	2015062	2015067	-	2015067	21	34	intergenic	Zm00001d023276	Zm00001d023276_T001	8675	2006392-2006477	2006392-2006477	0	tRNA	6	2
10	2015141	2015142	-	2015141	9	13	intergenic	Zm00001d023276	Zm00001d023276_T001	8749	2006392-2006477	2006392-2006477	0	tRNA	2	2
10	2015448	2015449	-	2015448	5	9	intergenic	Zm00001d023276	Zm00001d023276_T001	9056	2006392-2006477	2006392-2006477	0	tRNA	2	2
10	2015479	2015479	-	2015479	4	4	intergenic	Zm00001d023276	Zm00001d023276_T001	9087	2006392-2006477	2006392-2006477	0	tRNA	1	1
10	2015581	2015581	-	2015581	11	11	intergenic	Zm00001d023276	Zm00001d023276_T001	9189	2006392-2006477	2006392-2006477	0	tRNA	1	1
10	2016285	2016285	-	2016285	4	4	intergenic	Zm00001d023276	Zm00001d023276_T001	9893	2006392-2006477	2006392-2006477	0	tRNA	1	1
10	2016335	2016335	-	2016335	6	6	intergenic	Zm00001d023276	Zm00001d023276_T001	9943	2006392-2006477	2006392-2006477	0	tRNA	1	1
10	2037243	2037334	-	2037314	167	307	extended	Zm00001d023280	Zm00001d023280_T001	204	2037518-2038156	2037518-2038156	0	protein_coding	92	13
10	2060064	2060064	-	2060064	3	3	intergenic	Zm00001d023283	Zm00001d023283_T001	1677	2061741-2063567	2061741-2063567	0	protein_coding	1	1
10	2061285	2061323	-	2061300	24	121	extended	Zm00001d023283	Zm00001d023283_T001	441	2061741-2063567	2061741-2063567	0	protein_coding	39	11
10	2061358	2061385	-	2061369	12	21	extended	Zm00001d023283	Zm00001d023283_T001	372	2061741-2063567	2061741-2063567	0	protein_coding	28	3
10	2062241	2062241	-	2062241	4	4	CDS	Zm00001d023283	Zm00001d023283_T001	0	2061741-2063567	2061741-2063567	0	protein_coding	1	1
10	2219504	2219504	-	2219504	3	3	extended	Zm00001d023289	Zm00001d023289_T001	421	2219925-2220221	2219925-2220221	0	protein_coding	1	1
10	2230220	2230221	-	2230220	44	48	3UTR	Zm00001d023290	Zm00001d023290_T001	0	2230214-2231452	2230214-2231452	254	protein_coding	2	2
10	2237428	2237491	-	2237429	80	140	extended	Zm00001d023292	Zm00001d023292_T002	1	2237430-2246156	2237430-2246156	561	protein_coding	64	7
10	2237601	2237601	-	2237601	3	3	3UTR	Zm00001d023292	Zm00001d023292_T002	0	2237430-2246156	2237430-2246156	561	protein_coding	1	1
10	2240580	2240580	-	2240580	5	5	intron	Zm00001d023292	Zm00001d023292_T002	0	2237430-2246156	2237430-2246156	561	protein_coding	1	1
10	2240609	2240629	-	2240609	7	18	intron	Zm00001d023292	Zm00001d023292_T002	0	2237430-2246156	2237430-2246156	561	protein_coding	21	4
10	2240726	2240731	-	2240729	31	70	intron	Zm00001d023292	Zm00001d023292_T002	0	2237430-2246156	2237430-2246156	561	protein_coding	6	4
10	2262481	2262481	-	2262481	4	4	3UTR	Zm00001d023294	Zm00001d023294_T001	0	2262454-2264529	2262454-2264529	226	protein_coding	1	1
10	2563526	2563540	-	2563540	11	17	intergenic	Zm00001d023308	Zm00001d023308_T001	75623	2639163-2639637	2639163-2639637	0	protein_coding	15	2
10	2563565	2563578	-	2563565	4	7	intergenic	Zm00001d023308	Zm00001d023308_T001	75598	2639163-2639637	2639163-2639637	0	protein_coding	14	2
10	2593099	2593099	-	2593099	3	3	intergenic	Zm00001d023308	Zm00001d023308_T001	46064	2639163-2639637	2639163-2639637	0	protein_coding	1	1
10	2593153	2593153	-	2593153	8	8	intergenic	Zm00001d023308	Zm00001d023308_T001	46010	2639163-2639637	2639163-2639637	0	protein_coding	1	1
10	2595062	2595062	-	2595062	3	3	intergenic	Zm00001d023308	Zm00001d023308_T001	44101	2639163-2639637	2639163-2639637	0	protein_coding	1	1
10	2638972	2639002	-	2638976	19	45	extended	Zm00001d023308	Zm00001d023308_T001	187	2639163-2639637	2639163-2639637	0	protein_coding	31	6
10	2640522	2640524	-	2640522	12	15	3UTR	Zm00001d023309	Zm00001d023309_T002	0	2640440-2644386	2640438-2644386	352	protein_coding	3	2
10	2640552	2640639	-	2640596	49	139	3UTR	Zm00001d023309	Zm00001d023309_T002	0	2640440-2644386	2640438-2644386	352	protein_coding	88	12
10	2640678	2640678	-	2640678	9	9	3UTR	Zm00001d023309	Zm00001d023309_T002	0	2640440-2644386	2640438-2644386	352	protein_coding	1	1
10	2640717	2640742	-	2640721	4	11	3UTR	Zm00001d023309	Zm00001d023309_T002	0	2640440-2644386	2640438-2644386	352	protein_coding	26	3
10	2748516	2748516	-	2748516	4	4	intergenic	Zm00001d023309	Zm00001d023309_T002	108076	2640440-2644386	2640438-2644386	352	protein_coding	1	1
10	2963941	2963963	-	2963941	6	10	intron	Zm00001d023318	Zm00001d023318_T007	0	2950377-2965782	2950377-2965782	4271	protein_coding	23	2
10	3505448	3505448	-	3505448	3	3	CDS	Zm00001d023329	Zm00001d023329_T001	0	3504673-3508509	3504673-3508509	0	protein_coding	1	1
10	3603104	3603106	-	3603106	4	7	intergenic	Zm00001d023333	Zm00001d023333_T003	3292	3606398-3621010	3606398-3621010	1730	protein_coding	3	2
10	3605133	3605133	-	3605133	3	3	intergenic	Zm00001d023333	Zm00001d023333_T003	1265	3606398-3621010	3606398-3621010	1730	protein_coding	1	1
10	3605970	3605970	-	3605970	3	3	intergenic	Zm00001d023333	Zm00001d023333_T003	428	3606398-3621010	3606398-3621010	1730	protein_coding	1	1
10	3606779	3606784	-	3606784	4	7	3UTR	Zm00001d023333	Zm00001d023333_T003	0	3606398-3621010	3606398-3621010	1730	protein_coding	6	2
10	3607276	3607277	-	3607276	5	8	3UTR	Zm00001d023333	Zm00001d023333_T003	0	3606398-3621010	3606398-3621010	1730	protein_coding	2	2
10	3607328	3607336	-	3607336	6	10	3UTR	Zm00001d023333	Zm00001d023333_T003	0	3606398-3621010	3606398-3621010	1730	protein_coding	9	2
10	3607606	3607606	-	3607606	3	3	3UTR	Zm00001d023333	Zm00001d023333_T003	0	3606398-3621010	3606398-3621010	1730	protein_coding	1	1
10	3607981	3607981	-	3607981	5	5	intron	Zm00001d023333	Zm00001d023333_T003	0	3606398-3621010	3606398-3621010	1730	protein_coding	1	1
10	3608078	3608078	-	3608078	6	6	intron	Zm00001d023333	Zm00001d023333_T003	0	3606398-3621010	3606398-3621010	1730	protein_coding	1	1
10	3608108	3608108	-	3608108	16	16	intron	Zm00001d023333	Zm00001d023333_T003	0	3606398-3621010	3606398-3621010	1730	protein_coding	1	1
10	3608144	3608144	-	3608144	5	5	intron	Zm00001d023333	Zm00001d023333_T003	0	3606398-3621010	3606398-3621010	1730	protein_coding	1	1
10	3608183	3608208	-	3608208	7	14	intron	Zm00001d023333	Zm00001d023333_T003	0	3606398-3621010	3606398-3621010	1730	protein_coding	26	3
10	3608255	3608305	-	3608264	104	153	intron	Zm00001d023333	Zm00001d023333_T003	0	3606398-3621010	3606398-3621010	1730	protein_coding	51	11
10	3618876	3618876	-	3618876	3	3	intron	Zm00001d023333	Zm00001d023333_T003	0	3606398-3621010	3606398-3621010	1730	protein_coding	1	1
10	3618970	3618970	-	3618970	4	4	intron	Zm00001d023333	Zm00001d023333_T003	0	3606398-3621010	3606398-3621010	1730	protein_coding	1	1
10	3619470	3619470	-	3619470	5	5	CDS	Zm00001d023333	Zm00001d023333_T003	0	3606398-3621010	3606398-3621010	1730	protein_coding	1	1
10	3630616	3630616	-	3630616	10	10	intergenic	Zm00001d023333	Zm00001d023333_T003	24218	3606398-3621010	3606398-3621010	1730	protein_coding	1	1
10	3630819	3630821	-	3630819	3	6	intergenic	Zm00001d023333	Zm00001d023333_T003	24421	3606398-3621010	3606398-3621010	1730	protein_coding	3	2
10	3630858	3630858	-	3630858	5	5	intergenic	Zm00001d023333	Zm00001d023333_T003	24460	3606398-3621010	3606398-3621010	1730	protein_coding	1	1
10	3630956	3630956	-	3630956	6	6	intergenic	Zm00001d023333	Zm00001d023333_T003	24558	3606398-3621010	3606398-3621010	1730	protein_coding	1	1
10	3631002	3631025	-	3631002	3	9	intergenic	Zm00001d023333	Zm00001d023333_T003	24604	3606398-3621010	3606398-3621010	1730	protein_coding	24	3
10	3631062	3631062	-	3631062	3	3	intergenic	Zm00001d023333	Zm00001d023333_T003	24664	3606398-3621010	3606398-3621010	1730	protein_coding	1	1
10	3632107	3632107	-	3632107	4	4	intergenic	Zm00001d023338	Zm00001d023338_T001	24316	3656423-3656496	3656423-3656496	0	tRNA	1	1
10	3632154	3632154	-	3632154	7	7	intergenic	Zm00001d023338	Zm00001d023338_T001	24269	3656423-3656496	3656423-3656496	0	tRNA	1	1
10	3632218	3632218	-	3632218	3	3	intergenic	Zm00001d023338	Zm00001d023338_T001	24205	3656423-3656496	3656423-3656496	0	tRNA	1	1
10	3632662	3632662	-	3632662	4	4	intergenic	Zm00001d023338	Zm00001d023338_T001	23761	3656423-3656496	3656423-3656496	0	tRNA	1	1
10	3632967	3632985	-	3632967	4	7	intergenic	Zm00001d023338	Zm00001d023338_T001	23456	3656423-3656496	3656423-3656496	0	tRNA	19	2
10	3651825	3651837	-	3651835	8	14	intergenic	Zm00001d023338	Zm00001d023338_T001	4588	3656423-3656496	3656423-3656496	0	tRNA	13	3
10	3669802	3669804	-	3669802	14	25	extended	Zm00001d023340	Zm00001d023340_T001	81	3669883-3672428	3669883-3672428	199	protein_coding	3	2
10	3669859	3669962	-	3669886	736	1178	3UTR	Zm00001d023340	Zm00001d023340_T001	0	3669883-3672428	3669883-3672428	199	protein_coding	104	25
10	3824773	3824841	-	3824775	125	531	3UTR	Zm00001d023343	Zm00001d023343_T001	0	3824749-3825745	3824749-3825745	382	protein_coding	69	20
10	3824969	3824969	-	3824969	7	7	3UTR	Zm00001d023343	Zm00001d023343_T001	0	3824749-3825745	3824749-3825745	382	protein_coding	1	1
10	3854268	3854384	-	3854278	834	2916	3UTR	Zm00001d023345	Zm00001d023345_T001	0	3854020-3855250	3854020-3855250	714	protein_coding	117	39
10	3854480	3854487	-	3854487	5	12	3UTR	Zm00001d023345	Zm00001d023345_T001	0	3854020-3855250	3854020-3855250	714	protein_coding	8	3
10	3908324	3908324	-	3908324	3	3	extended	Zm00001d023349	Zm00001d023349_T001	147	3908471-3909772	3908471-3909772	0	protein_coding	1	1
10	4047552	4047552	-	4047552	7	7	intergenic	Zm00001d023356	Zm00001d023356_T001	6653	4054205-4057138	4054205-4057138	0	protein_coding	1	1
10	4047664	4047667	-	4047665	7	17	intergenic	Zm00001d023356	Zm00001d023356_T001	6540	4054205-4057138	4054205-4057138	0	protein_coding	4	4
10	4128107	4128107	-	4128107	3	3	extended	Zm00001d023366	Zm00001d023366_T001	113	4128220-4129971	4128220-4129971	416	protein_coding	1	1
10	4128163	4128226	-	4128220	25	81	3UTR	Zm00001d023366	Zm00001d023366_T001	0	4128220-4129971	4128220-4129971	416	protein_coding	64	7
10	4128276	4128317	-	4128276	17	57	3UTR	Zm00001d023366	Zm00001d023366_T001	0	4128220-4129971	4128220-4129971	416	protein_coding	42	7
10	4128359	4128394	-	4128382	55	72	3UTR	Zm00001d023366	Zm00001d023366_T001	0	4128220-4129971	4128220-4129971	416	protein_coding	36	4
10	4128512	4128512	-	4128512	3	3	3UTR	Zm00001d023366	Zm00001d023366_T001	0	4128220-4129971	4128220-4129971	416	protein_coding	1	1
10	4157996	4158003	-	4157996	6	11	extended	Zm00001d023367	Zm00001d023367_T001	143	4158139-4164989	4158139-4164989	4034	protein_coding	8	2
10	4158115	4158148	-	4158133	6	21	extended	Zm00001d023367	Zm00001d023367_T001	6	4158139-4164989	4158139-4164989	4034	protein_coding	34	5
10	4158181	4158200	-	4158188	184	521	3UTR	Zm00001d023367	Zm00001d023367_T001	0	4158139-4164989	4158139-4164989	4034	protein_coding	20	12
10	4158335	4158335	-	4158335	4	4	3UTR	Zm00001d023367	Zm00001d023367_T001	0	4158139-4164989	4158139-4164989	4034	protein_coding	1	1
10	4163671	4163671	-	4163671	3	3	CDS	Zm00001d023367	Zm00001d023367_T001	0	4158139-4164989	4158139-4164989	4034	protein_coding	1	1
10	4183331	4183340	-	4183340	12	30	intergenic	Zm00001d023368	Zm00001d023368_T003	574	4183914-4190591	4183914-4190591	0	protein_coding	10	3
10	4183429	4183455	-	4183434	9	25	intergenic	Zm00001d023368	Zm00001d023368_T003	480	4183914-4190591	4183914-4190591	0	protein_coding	27	4
10	4183481	4183481	-	4183481	7	7	extended	Zm00001d023368	Zm00001d023368_T003	433	4183914-4190591	4183914-4190591	0	protein_coding	1	1
10	4184862	4184926	-	4184907	30	100	intron	Zm00001d023368	Zm00001d023368_T003	0	4183914-4190591	4183914-4190591	0	protein_coding	65	8
10	4185000	4185098	-	4185029	28	81	intron	Zm00001d023368	Zm00001d023368_T003	0	4183914-4190591	4183914-4190591	0	protein_coding	99	8
10	4190679	4190857	-	4190740	376	1307	3UTR	Zm00001d023371	Zm00001d023371_T001	0	4190680-4193349	4190680-4193349	271	protein_coding	179	44
10	4191907	4191907	-	4191907	3	3	intron	Zm00001d023371	Zm00001d023371_T001	0	4190680-4193349	4190680-4193349	271	protein_coding	1	1
10	4236890	4236890	-	4236890	4	4	extended	Zm00001d023373	Zm00001d023373_T003	30	4236920-4263190	4236920-4263190	296	protein_coding	1	1
10	4236918	4236918	-	4236918	17	17	extended	Zm00001d023373	Zm00001d023373_T003	2	4236920-4263190	4236920-4263190	296	protein_coding	1	1
10	4236966	4237028	-	4236988	60	386	3UTR	Zm00001d023373	Zm00001d023373_T003	0	4236920-4263190	4236920-4263190	296	protein_coding	63	18
10	4263611	4263626	-	4263626	28	36	extended	Zm00001d023374	Zm00001d023374_T001	10	4263636-4265759	4263636-4265759	248	protein_coding	16	3
10	4263661	4263661	-	4263661	4	4	3UTR	Zm00001d023374	Zm00001d023374_T001	0	4263636-4265759	4263636-4265759	248	protein_coding	1	1
10	4263701	4263734	-	4263716	14	29	3UTR	Zm00001d023374	Zm00001d023374_T001	0	4263636-4265759	4263636-4265759	248	protein_coding	34	4
10	4272240	4272240	-	4272240	6	6	extended	Zm00001d023376	Zm00001d023376_T002	28	4272268-4274843	4272268-4274843	441	protein_coding	1	1
10	4272330	4272366	-	4272348	29	42	3UTR	Zm00001d023376	Zm00001d023376_T002	0	4272268-4274843	4272268-4274843	441	protein_coding	37	4
10	4272419	4272496	-	4272422	236	775	3UTR	Zm00001d023376	Zm00001d023376_T002	0	4272268-4274843	4272268-4274843	441	protein_coding	78	17
10	4272559	4272582	-	4272559	13	34	3UTR	Zm00001d023376	Zm00001d023376_T002	0	4272268-4274843	4272268-4274843	441	protein_coding	24	7
10	4280859	4280890	-	4280884	37	69	3UTR	Zm00001d023377	Zm00001d023377_T001	0	4280884-4286389	4280884-4286389	166	protein_coding	32	5
10	4280983	4280983	-	4280983	4	4	3UTR	Zm00001d023377	Zm00001d023377_T001	0	4280884-4286389	4280884-4286389	166	protein_coding	1	1
10	4285388	4285423	-	4285394	8	28	intron	Zm00001d023377	Zm00001d023377_T001	0	4280884-4286389	4280884-4286389	166	protein_coding	36	6
10	4293064	4293066	-	4293064	9	12	extended	Zm00001d023379	Zm00001d023379_T001	55	4293119-4298209	4293119-4298209	315	protein_coding	3	2
10	4293094	4293338	-	4293149	913	4477	3UTR	Zm00001d023379	Zm00001d023379_T001	0	4293119-4298209	4293119-4298209	315	protein_coding	245	87
10	4293788	4293788	-	4293788	3	3	intron	Zm00001d023379	Zm00001d023379_T001	0	4293119-4298209	4293119-4298209	315	protein_coding	1	1
10	4293972	4293978	-	4293972	5	9	intron	Zm00001d023379	Zm00001d023379_T001	0	4293119-4298209	4293119-4298209	315	protein_coding	7	2
10	4335106	4335128	-	4335118	11	19	3UTR	Zm00001d023384	Zm00001d023384_T001	0	4335098-4336256	4335098-4336256	379	protein_coding	23	3
10	4335168	4335187	-	4335186	4	10	3UTR	Zm00001d023384	Zm00001d023384_T001	0	4335098-4336256	4335098-4336256	379	protein_coding	20	3
10	4343896	4343896	-	4343896	6	6	intergenic	Zm00001d023385	Zm00001d023385_T001	3715	4347611-4348392	4347611-4348392	235	protein_coding	1	1
10	4374533	4374605	-	4374548	30	120	extended	Zm00001d023387	Zm00001d023387_T001	154	4374702-4375148	4374702-4375148	0	protein_coding	73	11
10	4495322	4495322	-	4495322	11	11	extended	Zm00001d023392	Zm00001d023392_T002	1	4495323-4511091	4495323-4511091	278	protein_coding	1	1
10	4672310	4672310	-	4672310	3	3	extended	Zm00001d023395	Zm00001d023395_T001	16	4672326-4673327	4672326-4673327	341	protein_coding	1	1
10	4672347	4672475	-	4672436	100	491	3UTR	Zm00001d023395	Zm00001d023395_T001	0	4672326-4673327	4672326-4673327	341	protein_coding	129	22
10	4672500	4672500	-	4672500	3	3	3UTR	Zm00001d023395	Zm00001d023395_T001	0	4672326-4673327	4672326-4673327	341	protein_coding	1	1
10	4674344	4674357	-	4674344	14	17	extended	Zm00001d023396	Zm00001d023396_T001	31	4674375-4678089	4674375-4678089	364	protein_coding	14	2
10	4675084	4675084	-	4675084	3	3	CDS	Zm00001d023396	Zm00001d023396_T001	0	4674375-4678089	4674375-4678089	364	protein_coding	1	1
10	4727162	4727162	-	4727162	3	3	extended	Zm00001d023399	Zm00001d023399_T001	325	4727487-4728857	4727487-4728857	0	protein_coding	1	1
10	4727237	4727237	-	4727237	3	3	extended	Zm00001d023399	Zm00001d023399_T001	250	4727487-4728857	4727487-4728857	0	protein_coding	1	1
10	4727267	4727267	-	4727267	9	9	extended	Zm00001d023399	Zm00001d023399_T001	220	4727487-4728857	4727487-4728857	0	protein_coding	1	1
10	4727318	4727318	-	4727318	46	46	extended	Zm00001d023399	Zm00001d023399_T001	169	4727487-4728857	4727487-4728857	0	protein_coding	1	1
10	4731841	4731841	-	4731841	10	10	intron	Zm00001d023400	Zm00001d023400_T001	0	4731068-4733561	4731068-4733727	0	protein_coding	1	1
10	4731919	4731930	-	4731919	8	16	intron	Zm00001d023400	Zm00001d023400_T001	0	4731068-4733561	4731068-4733727	0	protein_coding	12	2
10	4731962	4731962	-	4731962	4	4	intron	Zm00001d023400	Zm00001d023400_T001	0	4731068-4733561	4731068-4733727	0	protein_coding	1	1
10	4738104	4738104	-	4738104	3	3	extended	Zm00001d023401	Zm00001d023401_T001	178	4738282-4739319	4738282-4739319	0	protein_coding	1	1
10	4740746	4740746	-	4740746	3	3	3UTR	Zm00001d023402	Zm00001d023402_T001	0	4740647-4742679	4740647-4742679	252	protein_coding	1	1
10	5018155	5018155	-	5018155	4	4	extended	Zm00001d023410	Zm00001d023410_T001	22	5018177-5021314	5018177-5021314	332	protein_coding	1	1
10	5102903	5102903	-	5102903	3	3	intergenic	Zm00001d023422	Zm00001d023422_T001	852	5103755-5105905	5103755-5105905	0	protein_coding	1	1
10	5102957	5102957	-	5102957	3	3	intergenic	Zm00001d023422	Zm00001d023422_T001	798	5103755-5105905	5103755-5105905	0	protein_coding	1	1
10	5103002	5103024	-	5103002	4	7	intergenic	Zm00001d023422	Zm00001d023422_T001	753	5103755-5105905	5103755-5105905	0	protein_coding	23	2
10	5103127	5103231	-	5103139	11	66	intergenic	Zm00001d023422	Zm00001d023422_T001	616	5103755-5105905	5103755-5105905	0	protein_coding	105	12
10	5103367	5103367	-	5103367	3	3	extended	Zm00001d023422	Zm00001d023422_T001	388	5103755-5105905	5103755-5105905	0	protein_coding	1	1
10	5172801	5172801	-	5172801	4	4	intergenic	Zm00001d023423	Zm00001d023423_T003	1003	5173804-5179273	5173804-5179273	2886	protein_coding	1	1
10	5173785	5173804	-	5173798	26	46	extended	Zm00001d023423	Zm00001d023423_T003	6	5173804-5179273	5173804-5179273	2886	protein_coding	20	6
10	5173854	5173889	-	5173883	908	983	3UTR	Zm00001d023423	Zm00001d023423_T003	0	5173804-5179273	5173804-5179273	2886	protein_coding	36	8
10	5173916	5173943	-	5173943	8	16	3UTR	Zm00001d023423	Zm00001d023423_T003	0	5173804-5179273	5173804-5179273	2886	protein_coding	28	3
10	5173971	5173971	-	5173971	3	3	3UTR	Zm00001d023423	Zm00001d023423_T003	0	5173804-5179273	5173804-5179273	2886	protein_coding	1	1
10	5174043	5174043	-	5174043	3	3	3UTR	Zm00001d023423	Zm00001d023423_T003	0	5173804-5179273	5173804-5179273	2886	protein_coding	1	1
10	5174120	5174120	-	5174120	4	4	3UTR	Zm00001d023423	Zm00001d023423_T003	0	5173804-5179273	5173804-5179273	2886	protein_coding	1	1
10	5180281	5180281	-	5180281	3	3	extended	Zm00001d023424	Zm00001d023424_T001	100	5180381-5183180	5180381-5183180	470	protein_coding	1	1
10	5285802	5285811	-	5285811	6	11	3UTR	Zm00001d023426	Zm00001d023426_T001	0	5284902-5291881	5284902-5291881	2836	protein_coding	10	2
10	5285909	5285913	-	5285909	13	17	3UTR	Zm00001d023426	Zm00001d023426_T001	0	5284902-5291881	5284902-5291881	2836	protein_coding	5	2
10	5287155	5287185	-	5287171	6	14	3UTR	Zm00001d023426	Zm00001d023426_T001	0	5284902-5291881	5284902-5291881	2836	protein_coding	31	3
10	5287236	5287260	-	5287236	76	139	3UTR	Zm00001d023426	Zm00001d023426_T001	0	5284902-5291881	5284902-5291881	2836	protein_coding	25	5
10	5287297	5287309	-	5287305	7	17	3UTR	Zm00001d023426	Zm00001d023426_T001	0	5284902-5291881	5284902-5291881	2836	protein_coding	13	3
10	5287418	5287425	-	5287418	4	7	3UTR	Zm00001d023426	Zm00001d023426_T001	0	5284902-5291881	5284902-5291881	2836	protein_coding	8	2
10	5419970	5419996	-	5419996	12	38	3UTR	Zm00001d023431	Zm00001d023431_T001	0	5419971-5427473	5419971-5427473	374	protein_coding	27	5
10	5420047	5420072	-	5420049	46	62	3UTR	Zm00001d023431	Zm00001d023431_T001	0	5419971-5427473	5419971-5427473	374	protein_coding	26	3
10	5420119	5420157	-	5420145	85	162	3UTR	Zm00001d023431	Zm00001d023431_T001	0	5419971-5427473	5419971-5427473	374	protein_coding	39	9
10	5420241	5420241	-	5420241	3	3	3UTR	Zm00001d023431	Zm00001d023431_T001	0	5419971-5427473	5419971-5427473	374	protein_coding	1	1
10	5430077	5430077	-	5430077	7	7	extended	Zm00001d023432	Zm00001d023432_T001	54	5430131-5433276	5430131-5433276	244	protein_coding	1	1
10	5430120	5430212	-	5430142	132	249	3UTR	Zm00001d023432	Zm00001d023432_T001	0	5430131-5433276	5430131-5433276	244	protein_coding	93	16
10	5439444	5439444	-	5439444	6	6	3UTR	Zm00001d023434	Zm00001d023434_T001	0	5439443-5444101	5439443-5444101	302	protein_coding	1	1
10	5439496	5439605	-	5439496	30	182	3UTR	Zm00001d023434	Zm00001d023434_T001	0	5439443-5444101	5439443-5444101	302	protein_coding	110	21
10	5439642	5439670	-	5439655	13	35	3UTR	Zm00001d023434	Zm00001d023434_T001	0	5439443-5444101	5439443-5444101	302	protein_coding	29	6
10	5749752	5749752	-	5749752	4	4	intergenic	Zm00001d023045	Zm00001d023045_T001	2541	5752293-5753439	5752293-5753439	0	lincRNA	1	1
10	5751866	5751866	-	5751866	5	5	extended	Zm00001d023045	Zm00001d023045_T001	427	5752293-5753439	5752293-5753439	0	lincRNA	1	1
10	5751907	5751907	-	5751907	4	4	extended	Zm00001d023045	Zm00001d023045_T001	386	5752293-5753439	5752293-5753439	0	lincRNA	1	1
10	5751964	5751964	-	5751964	3	3	extended	Zm00001d023045	Zm00001d023045_T001	329	5752293-5753439	5752293-5753439	0	lincRNA	1	1
10	5752025	5752025	-	5752025	9	9	extended	Zm00001d023045	Zm00001d023045_T001	268	5752293-5753439	5752293-5753439	0	lincRNA	1	1
10	5752966	5752986	-	5752966	3	6	intron	Zm00001d023045	Zm00001d023045_T001	0	5752293-5753439	5752293-5753439	0	lincRNA	21	2
10	5753295	5753302	-	5753298	6	15	intron	Zm00001d023045	Zm00001d023045_T001	0	5752293-5753439	5752293-5753439	0	lincRNA	8	3
10	5754910	5754910	-	5754910	8	8	intergenic	Zm00001d023447	Zm00001d023447_T001	1455	5753455-5754612	5753455-5754612	0	protein_coding	1	1
10	5901862	5901893	-	5901881	13	42	intergenic	Zm00001d023450	Zm00001d023450_T001	184	5902065-5906458	5902065-5906458	18	protein_coding	32	6
10	5903055	5903055	-	5903055	3	3	intron	Zm00001d023450	Zm00001d023450_T001	0	5902065-5906458	5902065-5906458	18	protein_coding	1	1
10	5905685	5905685	-	5905685	3	3	intron	Zm00001d023450	Zm00001d023450_T001	0	5902065-5906458	5902065-5906458	18	protein_coding	1	1
10	5907862	5907862	-	5907862	4	4	intergenic	Zm00001d023450	Zm00001d023450_T001	5797	5902065-5906458	5902065-5906458	18	protein_coding	1	1
10	6046153	6046176	-	6046153	41	85	extended	Zm00001d023452	Zm00001d023452_T001	17	6046170-6050178	6046170-6050178	400	protein_coding	24	4
10	6046217	6046239	-	6046217	10	16	3UTR	Zm00001d023452	Zm00001d023452_T001	0	6046170-6050178	6046170-6050178	400	protein_coding	23	3
10	6046304	6046308	-	6046304	4	7	3UTR	Zm00001d023452	Zm00001d023452_T001	0	6046170-6050178	6046170-6050178	400	protein_coding	5	2
10	6046362	6046498	-	6046484	923	2172	3UTR	Zm00001d023452	Zm00001d023452_T001	0	6046170-6050178	6046170-6050178	400	protein_coding	137	32
10	6098478	6098478	-	6098478	33	33	intergenic	Zm00001d023456	Zm00001d023456_T001	593	6099071-6099862	6099071-6099862	0	protein_coding	1	1
10	6298044	6298044	-	6298044	3	3	intergenic	Zm00001d023461	Zm00001d023461_T001	1102	6299146-6299676	6299146-6299676	0	protein_coding	1	1
10	6298872	6298883	-	6298878	15	27	extended	Zm00001d023461	Zm00001d023461_T001	268	6299146-6299676	6299146-6299676	0	protein_coding	12	4
10	6427162	6427162	-	6427162	3	3	intergenic	Zm00001d023465	Zm00001d023465_T002	178	6427340-6432014	6427340-6432014	541	protein_coding	1	1
10	6427214	6427214	-	6427214	3	3	extended	Zm00001d023465	Zm00001d023465_T002	126	6427340-6432014	6427340-6432014	541	protein_coding	1	1
10	6427280	6427280	-	6427280	4	4	extended	Zm00001d023465	Zm00001d023465_T002	60	6427340-6432014	6427340-6432014	541	protein_coding	1	1
10	6427326	6427368	-	6427326	32	89	extended	Zm00001d023465	Zm00001d023465_T002	14	6427340-6432014	6427340-6432014	541	protein_coding	43	6
10	6427401	6427556	-	6427470	102	741	3UTR	Zm00001d023465	Zm00001d023465_T002	0	6427340-6432014	6427340-6432014	541	protein_coding	156	34
10	6427691	6427705	-	6427705	7	15	3UTR	Zm00001d023465	Zm00001d023465_T002	0	6427340-6432014	6427340-6432014	541	protein_coding	15	3
10	6427751	6427764	-	6427756	5	12	3UTR	Zm00001d023465	Zm00001d023465_T002	0	6427340-6432014	6427340-6432014	541	protein_coding	14	3
10	6431236	6431236	-	6431236	10	10	intron	Zm00001d023465	Zm00001d023465_T002	0	6427340-6432014	6427340-6432014	541	protein_coding	1	1
10	6431280	6431280	-	6431280	3	3	intron	Zm00001d023465	Zm00001d023465_T002	0	6427340-6432014	6427340-6432014	541	protein_coding	1	1
10	6631350	6631435	-	6631376	435	921	extended	Zm00001d023468	Zm00001d023468_T001	310	6631686-6632327	6631686-6632327	0	protein_coding	86	22
10	6631486	6631513	-	6631492	434	833	extended	Zm00001d023468	Zm00001d023468_T001	194	6631686-6632327	6631686-6632327	0	protein_coding	28	17
10	6635084	6635084	-	6635084	8	8	extended	Zm00001d023469	Zm00001d023469_T002	12	6635096-6641682	6635096-6641682	301	protein_coding	1	1
10	6635112	6635151	-	6635112	14	49	3UTR	Zm00001d023469	Zm00001d023469_T002	0	6635096-6641682	6635096-6641682	301	protein_coding	40	6
10	6635205	6635205	-	6635205	3	3	3UTR	Zm00001d023469	Zm00001d023469_T002	0	6635096-6641682	6635096-6641682	301	protein_coding	1	1
10	6821463	6821499	-	6821463	4	11	3UTR	Zm00001d023472	Zm00001d023472_T001	0	6821358-6828230	6821358-6828230	329	protein_coding	37	3
10	6886266	6886266	-	6886266	3	3	intergenic	Zm00001d023478	Zm00001d023478_T001	21487	6907753-6910045	6907753-6910045	233	protein_coding	1	1
10	6907534	6907540	-	6907536	378	497	intergenic	Zm00001d023478	Zm00001d023478_T001	217	6907753-6910045	6907753-6910045	233	protein_coding	7	6
10	6907570	6907581	-	6907581	104	175	intergenic	Zm00001d023478	Zm00001d023478_T001	172	6907753-6910045	6907753-6910045	233	protein_coding	12	5
10	6907641	6907649	-	6907641	5	13	extended	Zm00001d023478	Zm00001d023478_T001	112	6907753-6910045	6907753-6910045	233	protein_coding	9	3
10	6907695	6907749	-	6907743	92	429	extended	Zm00001d023478	Zm00001d023478_T001	10	6907753-6910045	6907753-6910045	233	protein_coding	55	21
10	6907787	6907793	-	6907793	5	8	3UTR	Zm00001d023478	Zm00001d023478_T001	0	6907753-6910045	6907753-6910045	233	protein_coding	7	2
10	6908620	6908620	-	6908620	9	9	intron	Zm00001d023478	Zm00001d023478_T001	0	6907753-6910045	6907753-6910045	233	protein_coding	1	1
10	6909184	6909184	-	6909184	3	3	intron	Zm00001d023478	Zm00001d023478_T001	0	6907753-6910045	6907753-6910045	233	protein_coding	1	1
10	6909230	6909230	-	6909230	17	17	intron	Zm00001d023478	Zm00001d023478_T001	0	6907753-6910045	6907753-6910045	233	protein_coding	1	1
10	7630291	7630299	-	7630291	3	9	intergenic	Zm00001d023504	Zm00001d023504_T002	737	7631028-7634680	7631028-7634680	288	protein_coding	9	3
10	7631121	7631135	-	7631121	91	104	3UTR	Zm00001d023504	Zm00001d023504_T002	0	7631028-7634680	7631028-7634680	288	protein_coding	15	3
10	7803009	7803023	-	7803009	68	81	3UTR	Zm00001d023506	Zm00001d023506_T002	0	7802963-7806695	7802956-7806695	241	protein_coding	15	3
10	8282839	8282900	-	8282853	35	72	extended	Zm00001d023512	Zm00001d023512_T001	165	8283018-8283407	8283018-8283407	0	protein_coding	62	9
10	8282938	8282957	-	8282938	57	109	extended	Zm00001d023512	Zm00001d023512_T001	80	8283018-8283407	8283018-8283407	0	protein_coding	20	6
10	8284670	8284670	-	8284670	6	6	extended	Zm00001d023513	Zm00001d023513_T001	319	8284989-8287040	8284989-8287040	0	protein_coding	1	1
10	8362842	8362842	-	8362842	3	3	extended	Zm00001d023514	Zm00001d023514_T002	46	8362888-8366417	8362888-8366417	1454	protein_coding	1	1
10	8362889	8362945	-	8362938	139	398	3UTR	Zm00001d023514	Zm00001d023514_T002	0	8362888-8366417	8362888-8366417	1454	protein_coding	57	13
10	8362986	8363000	-	8362989	16	33	3UTR	Zm00001d023514	Zm00001d023514_T002	0	8362888-8366417	8362888-8366417	1454	protein_coding	15	3
10	8363052	8363095	-	8363095	8	16	3UTR	Zm00001d023514	Zm00001d023514_T002	0	8362888-8366417	8362888-8366417	1454	protein_coding	44	3
10	8543255	8543255	-	8543255	3	3	extended	Zm00001d023516	Zm00001d023516_T001	108	8543363-8544872	8543363-8544872	0	protein_coding	1	1
10	8661230	8661260	-	8661260	25	34	extended	Zm00001d023522	Zm00001d023522_T001	239	8661499-8662677	8661499-8662677	0	protein_coding	31	3
10	8661286	8661293	-	8661291	5	12	extended	Zm00001d023522	Zm00001d023522_T001	208	8661499-8662677	8661499-8662677	0	protein_coding	8	3
10	8661322	8661359	-	8661322	14	23	extended	Zm00001d023522	Zm00001d023522_T001	177	8661499-8662677	8661499-8662677	0	protein_coding	38	4
10	8711074	8711086	-	8711081	118	197	extended	Zm00001d023523	Zm00001d023523_T005	2	8711083-8725025	8711082-8725025	428	protein_coding	13	7
10	8711139	8711255	-	8711242	48	249	3UTR	Zm00001d023523	Zm00001d023523_T005	0	8711083-8725025	8711082-8725025	428	protein_coding	117	16
10	8711335	8711336	-	8711335	8	16	3UTR	Zm00001d023523	Zm00001d023523_T005	0	8711083-8725025	8711082-8725025	428	protein_coding	2	2
10	8711364	8711376	-	8711376	4	7	3UTR	Zm00001d023523	Zm00001d023523_T005	0	8711083-8725025	8711082-8725025	428	protein_coding	13	2
10	8722620	8722620	-	8722620	4	4	intron	Zm00001d023523	Zm00001d023523_T005	0	8711083-8725025	8711082-8725025	428	protein_coding	1	1
10	8722711	8722726	-	8722711	4	7	intron	Zm00001d023523	Zm00001d023523_T005	0	8711083-8725025	8711082-8725025	428	protein_coding	16	2
10	8781230	8781434	-	8781353	391	1000	3UTR	Zm00001d023529	Zm00001d023529_T001	0	8781222-8782218	8781222-8782218	353	protein_coding	205	39
10	8784881	8784902	-	8784902	25	29	3UTR	Zm00001d023530	Zm00001d023530_T002	0	8784875-8791186	8784875-8791186	157	protein_coding	22	2
10	8784943	8784943	-	8784943	4	4	3UTR	Zm00001d023530	Zm00001d023530_T002	0	8784875-8791186	8784875-8791186	157	protein_coding	1	1
10	8868640	8868640	-	8868640	3	3	intergenic	Zm00001d023531	Zm00001d023531_T001	887	8869527-8872560	8869527-8872560	0	protein_coding	1	1
10	8868982	8868982	-	8868982	3	3	intergenic	Zm00001d023531	Zm00001d023531_T001	545	8869527-8872560	8869527-8872560	0	protein_coding	1	1
10	8869082	8869085	-	8869085	10	19	extended	Zm00001d023531	Zm00001d023531_T001	442	8869527-8872560	8869527-8872560	0	protein_coding	4	2
10	9153785	9153785	-	9153785	8	8	intron	Zm00001d023535	Zm00001d023535_T001	0	9153462-9156390	9153462-9156390	0	protein_coding	1	1
10	9153871	9153871	-	9153871	4	4	intron	Zm00001d023535	Zm00001d023535_T001	0	9153462-9156390	9153462-9156390	0	protein_coding	1	1
10	9157996	9157996	-	9157996	3	3	intergenic	Zm00001d023535	Zm00001d023535_T001	4534	9153462-9156390	9153462-9156390	0	protein_coding	1	1
10	9162581	9162581	-	9162581	6	6	extended	Zm00001d023536	Zm00001d023536_T001	29	9162610-9167073	9162610-9167073	216	protein_coding	1	1
10	9162609	9162638	-	9162622	5	11	3UTR	Zm00001d023536	Zm00001d023536_T001	0	9162610-9167073	9162610-9167073	216	protein_coding	30	3
10	9164989	9164989	-	9164989	3	3	intron	Zm00001d023536	Zm00001d023536_T001	0	9162610-9167073	9162610-9167073	216	protein_coding	1	1
10	9165088	9165088	-	9165088	11	11	intron	Zm00001d023536	Zm00001d023536_T001	0	9162610-9167073	9162610-9167073	216	protein_coding	1	1
10	9165168	9165182	-	9165178	84	136	intron	Zm00001d023536	Zm00001d023536_T001	0	9162610-9167073	9162610-9167073	216	protein_coding	15	6
10	9508168	9508327	-	9508279	771	1641	3UTR	Zm00001d023542	Zm00001d023542_T001	0	9508219-9510847	9508219-9510847	385	protein_coding	160	37
10	9508371	9508385	-	9508371	16	30	3UTR	Zm00001d023542	Zm00001d023542_T001	0	9508219-9510847	9508219-9510847	385	protein_coding	15	3
10	9508413	9508456	-	9508424	68	282	3UTR	Zm00001d023542	Zm00001d023542_T001	0	9508219-9510847	9508219-9510847	385	protein_coding	44	18
10	9508495	9508504	-	9508495	13	16	3UTR	Zm00001d023542	Zm00001d023542_T001	0	9508219-9510847	9508219-9510847	385	protein_coding	10	2
10	9508883	9508897	-	9508883	5	14	intron	Zm00001d023542	Zm00001d023542_T001	0	9508219-9510847	9508219-9510847	385	protein_coding	15	3
10	9592437	9592437	-	9592437	13	13	3UTR	Zm00001d023544	Zm00001d023544_T006	0	9592424-9599740	9592423-9599740	407	protein_coding	1	1
10	9592593	9592611	-	9592611	9	19	3UTR	Zm00001d023544	Zm00001d023544_T006	0	9592424-9599740	9592423-9599740	407	protein_coding	19	3
10	9848958	9848958	-	9848958	104	104	3UTR	Zm00001d023552	Zm00001d023552_T002	0	9848878-9850164	9848878-9850164	294	protein_coding	1	1
10	9848985	9849006	-	9848995	8	18	3UTR	Zm00001d023552	Zm00001d023552_T002	0	9848878-9850164	9848878-9850164	294	protein_coding	22	3
10	10159147	10159256	-	10159182	62	304	3UTR	Zm00001d023557	Zm00001d023557_T001	0	10159149-10163865	10159149-10163913	362	protein_coding	110	18
10	10159327	10159446	-	10159361	101	603	3UTR	Zm00001d023557	Zm00001d023557_T001	0	10159149-10163865	10159149-10163913	362	protein_coding	120	20
10	10159509	10159531	-	10159509	36	73	intron	Zm00001d023557	Zm00001d023557_T001	0	10159149-10163865	10159149-10163913	362	protein_coding	23	7
10	10159669	10159669	-	10159669	3	3	CDS	Zm00001d023557	Zm00001d023557_T001	0	10159149-10163865	10159149-10163913	362	protein_coding	1	1
10	10165016	10165016	-	10165016	4	4	extended	Zm00001d023558	Zm00001d023558_T001	221	10165237-10166640	10165237-10166640	0	protein_coding	1	1
10	10165048	10165118	-	10165095	24	88	extended	Zm00001d023558	Zm00001d023558_T001	142	10165237-10166640	10165237-10166640	0	protein_coding	71	9
10	10166831	10166831	-	10166831	3	3	intergenic	Zm00001d023558	Zm00001d023558_T001	1594	10165237-10166640	10165237-10166640	0	protein_coding	1	1
10	10215795	10215904	-	10215857	43	207	3UTR	Zm00001d023559	Zm00001d023559_T001	0	10215795-10217698	10215795-10217698	354	protein_coding	110	19
10	10215934	10215939	-	10215939	36	58	3UTR	Zm00001d023559	Zm00001d023559_T001	0	10215795-10217698	10215795-10217698	354	protein_coding	6	2
10	10215993	10216016	-	10216016	8	28	3UTR	Zm00001d023559	Zm00001d023559_T001	0	10215795-10217698	10215795-10217698	354	protein_coding	24	5
10	10216052	10216057	-	10216057	6	12	3UTR	Zm00001d023559	Zm00001d023559_T001	0	10215795-10217698	10215795-10217698	354	protein_coding	6	3
10	10218732	10218819	-	10218745	71	263	3UTR	Zm00001d023560	Zm00001d023560_T002	0	10218734-10222557	10218734-10222557	414	protein_coding	88	16
10	10218863	10218882	-	10218879	14	40	3UTR	Zm00001d023560	Zm00001d023560_T002	0	10218734-10222557	10218734-10222557	414	protein_coding	20	4
10	10218914	10218938	-	10218938	10	19	3UTR	Zm00001d023560	Zm00001d023560_T002	0	10218734-10222557	10218734-10222557	414	protein_coding	25	2
10	10266031	10266063	-	10266056	18	43	extended	Zm00001d023562	Zm00001d023562_T001	156	10266212-10266655	10266212-10266655	0	protein_coding	33	4
10	10309324	10309324	-	10309324	6	6	intergenic	Zm00001d023565	Zm00001d023565_T001	4241	10313565-10314782	10313565-10314782	0	protein_coding	1	1
10	10313049	10313141	-	10313084	81	223	intergenic	Zm00001d023565	Zm00001d023565_T001	481	10313565-10314782	10313565-10314782	0	protein_coding	93	22
10	10313177	10313213	-	10313197	37	87	extended	Zm00001d023565	Zm00001d023565_T001	368	10313565-10314782	10313565-10314782	0	protein_coding	37	5
10	10313252	10313263	-	10313252	7	10	extended	Zm00001d023565	Zm00001d023565_T001	313	10313565-10314782	10313565-10314782	0	protein_coding	12	2
10	10478112	10478112	-	10478112	3	3	extended	Zm00001d023568	Zm00001d023568_T001	162	10478274-10478636	10478274-10478636	0	protein_coding	1	1
10	10572085	10572085	-	10572085	3	3	intergenic	Zm00001d023574	Zm00001d023574_T001	3412	10568673-10569512	10568673-10569512	0	protein_coding	1	1
10	10581336	10581339	-	10581336	6	9	extended	Zm00001d023575	Zm00001d023575_T001	132	10581468-10581998	10581468-10581998	0	protein_coding	4	2
10	10619170	10619231	-	10619231	56	122	3UTR	Zm00001d023576	Zm00001d023576_T002	0	10618705-10623956	10618705-10623956	697	protein_coding	62	6
10	10619370	10619370	-	10619370	31	31	3UTR	Zm00001d023576	Zm00001d023576_T002	0	10618705-10623956	10618705-10623956	697	protein_coding	1	1
10	10619410	10619656	-	10619529	109	682	3UTR	Zm00001d023576	Zm00001d023576_T002	0	10618705-10623956	10618705-10623956	697	protein_coding	247	41
10	10634782	10634782	-	10634782	3	3	intergenic	Zm00001d023577	Zm00001d023577_T001	1111	10635893-10636069	10635893-10636069	0	protein_coding	1	1
10	10635524	10635527	-	10635524	15	23	extended	Zm00001d023577	Zm00001d023577_T001	369	10635893-10636069	10635893-10636069	0	protein_coding	4	2
10	10635553	10635584	-	10635553	21	59	extended	Zm00001d023577	Zm00001d023577_T001	340	10635893-10636069	10635893-10636069	0	protein_coding	32	7
10	10635625	10635710	-	10635678	227	566	extended	Zm00001d023577	Zm00001d023577_T001	215	10635893-10636069	10635893-10636069	0	protein_coding	86	19
10	10653609	10653609	-	10653609	4	4	intergenic	Zm00001d023577	Zm00001d023577_T001	17716	10635893-10636069	10635893-10636069	0	protein_coding	1	1
10	10822366	10822366	-	10822366	3	3	extended	Zm00001d023583	Zm00001d023583_T003	90	10822456-10840261	10822456-10840261	174	protein_coding	1	1
10	10822432	10822496	-	10822471	91	200	3UTR	Zm00001d023583	Zm00001d023583_T003	0	10822456-10840261	10822456-10840261	174	protein_coding	65	13
10	10919899	10920091	-	10920013	128	715	3UTR	Zm00001d023590	Zm00001d023590_T002	0	10919905-10924168	10919905-10924168	242	protein_coding	193	31
10	10920133	10920133	-	10920133	4	4	3UTR	Zm00001d023590	Zm00001d023590_T002	0	10919905-10924168	10919905-10924168	242	protein_coding	1	1
10	11236479	11236499	-	11236499	31	116	3UTR	Zm00001d023593	Zm00001d023593_T001	0	11236321-11238707	11236321-11238707	576	protein_coding	21	8
10	11236710	11236710	-	11236710	3	3	3UTR	Zm00001d023593	Zm00001d023593_T001	0	11236321-11238707	11236321-11238707	576	protein_coding	1	1
10	11356721	11356721	-	11356721	3	3	intergenic	Zm00001d023596	Zm00001d023596_T001	223	11356944-11358687	11356944-11358687	14	protein_coding	1	1
10	11402923	11402923	-	11402923	4	4	intergenic	Zm00001d023598	Zm00001d023598_T001	3686	11399237-11399308	11399237-11399308	0	tRNA	1	1
10	11856613	11856613	-	11856613	5	5	intergenic	Zm00001d023605	Zm00001d023605_T001	965	11855648-11856220	11855648-11856220	0	protein_coding	1	1
10	11856701	11856713	-	11856701	6	9	intergenic	Zm00001d023605	Zm00001d023605_T001	1053	11855648-11856220	11855648-11856220	0	protein_coding	13	2
10	11858230	11858253	-	11858247	63	117	3UTR	Zm00001d023606	Zm00001d023606_T004	0	11858189-11863254	11858189-11863254	3297	protein_coding	24	5
10	11858302	11858302	-	11858302	5	5	3UTR	Zm00001d023606	Zm00001d023606_T004	0	11858189-11863254	11858189-11863254	3297	protein_coding	1	1
10	11858387	11858451	-	11858392	58	163	3UTR	Zm00001d023606	Zm00001d023606_T004	0	11858189-11863254	11858189-11863254	3297	protein_coding	65	13
10	11858476	11858479	-	11858479	7	11	3UTR	Zm00001d023606	Zm00001d023606_T004	0	11858189-11863254	11858189-11863254	3297	protein_coding	4	2
10	11909608	11909690	-	11909631	59	296	3UTR	Zm00001d023608	Zm00001d023608_T001	0	11909371-11913564	11909371-11913564	491	protein_coding	83	16
10	12470352	12470352	-	12470352	4	4	extended	Zm00001d023620	Zm00001d023620_T001	327	12470679-12471620	12470679-12471620	0	protein_coding	1	1
10	12470465	12470468	-	12470465	12	22	extended	Zm00001d023620	Zm00001d023620_T001	214	12470679-12471620	12470679-12471620	0	protein_coding	4	2
10	12470518	12470541	-	12470518	4	8	extended	Zm00001d023620	Zm00001d023620_T001	161	12470679-12471620	12470679-12471620	0	protein_coding	24	2
10	12470579	12470579	-	12470579	3	3	extended	Zm00001d023620	Zm00001d023620_T001	100	12470679-12471620	12470679-12471620	0	protein_coding	1	1
10	12470628	12470628	-	12470628	4	4	extended	Zm00001d023620	Zm00001d023620_T001	51	12470679-12471620	12470679-12471620	0	protein_coding	1	1
10	12644947	12644947	-	12644947	3	3	extended	Zm00001d023625	Zm00001d023625_T001	231	12645178-12646963	12645178-12646963	0	protein_coding	1	1
10	12645107	12645107	-	12645107	4	4	extended	Zm00001d023625	Zm00001d023625_T001	71	12645178-12646963	12645178-12646963	0	protein_coding	1	1
10	12896177	12896319	-	12896271	35	232	intergenic	Zm00001d023634	Zm00001d023634_T001	2025	12898296-12906692	12898296-12906692	6173	protein_coding	143	18
10	12896370	12896370	-	12896370	4	4	intergenic	Zm00001d023634	Zm00001d023634_T001	1926	12898296-12906692	12898296-12906692	6173	protein_coding	1	1
10	12903046	12903046	-	12903046	3	3	3UTR	Zm00001d023634	Zm00001d023634_T001	0	12898296-12906692	12898296-12906692	6173	protein_coding	1	1
10	12903648	12903648	-	12903648	4	4	3UTR	Zm00001d023634	Zm00001d023634_T001	0	12898296-12906692	12898296-12906692	6173	protein_coding	1	1
10	12903686	12903701	-	12903701	9	18	3UTR	Zm00001d023634	Zm00001d023634_T001	0	12898296-12906692	12898296-12906692	6173	protein_coding	16	3
10	13069196	13069196	-	13069196	8	8	intergenic	Zm00001d023635	Zm00001d023635_T001	820	13070016-13075806	13070016-13075806	504	protein_coding	1	1
10	13069224	13069247	-	13069226	6	15	intergenic	Zm00001d023635	Zm00001d023635_T001	790	13070016-13075806	13070016-13075806	504	protein_coding	24	3
10	13069285	13069285	-	13069285	4	4	intergenic	Zm00001d023635	Zm00001d023635_T001	731	13070016-13075806	13070016-13075806	504	protein_coding	1	1
10	13070209	13070413	-	13070392	123	823	3UTR	Zm00001d023635	Zm00001d023635_T001	0	13070016-13075806	13070016-13075806	504	protein_coding	205	49
10	13070440	13070440	-	13070440	16	16	3UTR	Zm00001d023635	Zm00001d023635_T001	0	13070016-13075806	13070016-13075806	504	protein_coding	1	1
10	13146103	13146192	-	13146122	240	480	3UTR	Zm00001d023636	Zm00001d023636_T001	0	13145933-13165086	13145933-13165086	403	protein_coding	90	15
10	13317611	13317764	-	13317711	36	129	intron	Zm00001d023640	Zm00001d023640_T002	0	13316511-13341556	13316511-13341579	575	protein_coding	154	16
10	13323642	13323642	-	13323642	3	3	intron	Zm00001d023640	Zm00001d023640_T002	0	13316511-13341556	13316511-13341579	575	protein_coding	1	1
10	13357628	13357629	-	13357628	10	14	extended	Zm00001d023643	Zm00001d023643_T001	13	13357641-13357713	13357641-13357713	0	tRNA	2	2
10	13617074	13617074	-	13617074	12	12	3UTR	Zm00001d023648	Zm00001d023648_T003	0	13616666-13619050	13616666-13619050	693	protein_coding	1	1
10	13617171	13617171	-	13617171	4	4	3UTR	Zm00001d023648	Zm00001d023648_T003	0	13616666-13619050	13616666-13619050	693	protein_coding	1	1
10	13617200	13617234	-	13617230	30	87	3UTR	Zm00001d023648	Zm00001d023648_T003	0	13616666-13619050	13616666-13619050	693	protein_coding	35	6
10	14017176	14017191	-	14017176	10	13	intergenic	Zm00001d023660	Zm00001d023660_T001	32085	13985091-13986398	13985091-13986398	23	protein_coding	16	2
10	14025693	14025694	-	14025694	14	17	intergenic	Zm00001d023660	Zm00001d023660_T001	40603	13985091-13986398	13985091-13986398	23	protein_coding	2	2
10	14595587	14595587	-	14595587	5	5	intergenic	Zm00001d023671	Zm00001d023671_T001	62329	14657916-14658990	14657916-14658990	0	protein_coding	1	1
10	14652152	14652152	-	14652152	15	15	intergenic	Zm00001d023671	Zm00001d023671_T001	5764	14657916-14658990	14657916-14658990	0	protein_coding	1	1
10	14652732	14652756	-	14652756	6	13	intergenic	Zm00001d023671	Zm00001d023671_T001	5160	14657916-14658990	14657916-14658990	0	protein_coding	25	3
10	14652820	14652820	-	14652820	3	3	intergenic	Zm00001d023671	Zm00001d023671_T001	5096	14657916-14658990	14657916-14658990	0	protein_coding	1	1
10	14652881	14652881	-	14652881	4	4	intergenic	Zm00001d023671	Zm00001d023671_T001	5035	14657916-14658990	14657916-14658990	0	protein_coding	1	1
10	14652927	14652996	-	14652996	23	55	intergenic	Zm00001d023671	Zm00001d023671_T001	4920	14657916-14658990	14657916-14658990	0	protein_coding	70	8
10	14653028	14653029	-	14653028	6	10	intergenic	Zm00001d023671	Zm00001d023671_T001	4888	14657916-14658990	14657916-14658990	0	protein_coding	2	2
10	14653079	14653143	-	14653126	167	417	intergenic	Zm00001d023671	Zm00001d023671_T001	4790	14657916-14658990	14657916-14658990	0	protein_coding	65	19
10	14653192	14653192	-	14653192	6	6	intergenic	Zm00001d023671	Zm00001d023671_T001	4724	14657916-14658990	14657916-14658990	0	protein_coding	1	1
10	14653236	14653250	-	14653244	154	268	intergenic	Zm00001d023671	Zm00001d023671_T001	4672	14657916-14658990	14657916-14658990	0	protein_coding	15	10
10	14653281	14653287	-	14653286	15	33	intergenic	Zm00001d023671	Zm00001d023671_T001	4630	14657916-14658990	14657916-14658990	0	protein_coding	7	3
10	14653328	14653328	-	14653328	6	6	intergenic	Zm00001d023671	Zm00001d023671_T001	4588	14657916-14658990	14657916-14658990	0	protein_coding	1	1
10	14653370	14653421	-	14653389	55	177	intergenic	Zm00001d023671	Zm00001d023671_T001	4527	14657916-14658990	14657916-14658990	0	protein_coding	52	11
10	14653472	14653472	-	14653472	4	4	intergenic	Zm00001d023671	Zm00001d023671_T001	4444	14657916-14658990	14657916-14658990	0	protein_coding	1	1
10	15084192	15084192	-	15084192	3	3	intergenic	Zm00001d023681	Zm00001d023681_T001	124347	15208539-15211365	15208539-15211365	550	protein_coding	1	1
10	15208651	15208651	-	15208651	3	3	3UTR	Zm00001d023681	Zm00001d023681_T001	0	15208539-15211365	15208539-15211365	550	protein_coding	1	1
10	15304574	15304577	-	15304574	3	6	3UTR	Zm00001d023683	Zm00001d023683_T001	0	15304569-15307558	15304569-15307558	426	protein_coding	4	2
10	15304866	15304866	-	15304866	3	3	3UTR	Zm00001d023683	Zm00001d023683_T001	0	15304569-15307558	15304569-15307558	426	protein_coding	1	1
10	15732560	15732563	-	15732560	4	7	3UTR	Zm00001d023693	Zm00001d023693_T001	0	15732463-15734798	15732463-15734798	212	protein_coding	4	2
10	15879265	15879346	-	15879295	169	647	3UTR	Zm00001d023695	Zm00001d023695_T001	0	15879253-15882783	15879253-15882783	246	protein_coding	82	22
10	15879389	15879425	-	15879410	13	30	3UTR	Zm00001d023695	Zm00001d023695_T001	0	15879253-15882783	15879253-15882783	246	protein_coding	37	3
10	16001987	16001987	-	16001987	3	3	extended	Zm00001d023698	Zm00001d023698_T002	2	16001989-16006337	16001989-16006337	869	protein_coding	1	1
10	16002192	16002209	-	16002209	14	69	3UTR	Zm00001d023698	Zm00001d023698_T002	0	16001989-16006337	16001989-16006337	869	protein_coding	18	9
10	16002247	16002259	-	16002259	19	38	3UTR	Zm00001d023698	Zm00001d023698_T002	0	16001989-16006337	16001989-16006337	869	protein_coding	13	3
10	16002301	16002301	-	16002301	4	4	3UTR	Zm00001d023698	Zm00001d023698_T002	0	16001989-16006337	16001989-16006337	869	protein_coding	1	1
10	16002470	16002470	-	16002470	6	6	3UTR	Zm00001d023698	Zm00001d023698_T002	0	16001989-16006337	16001989-16006337	869	protein_coding	1	1
10	16002561	16002561	-	16002561	4	4	3UTR	Zm00001d023698	Zm00001d023698_T002	0	16001989-16006337	16001989-16006337	869	protein_coding	1	1
10	16002631	16002661	-	16002645	18	42	3UTR	Zm00001d023698	Zm00001d023698_T002	0	16001989-16006337	16001989-16006337	869	protein_coding	31	4
10	16002720	16002753	-	16002720	6	25	3UTR	Zm00001d023698	Zm00001d023698_T002	0	16001989-16006337	16001989-16006337	869	protein_coding	34	5
10	16002782	16002782	-	16002782	3	3	3UTR	Zm00001d023698	Zm00001d023698_T002	0	16001989-16006337	16001989-16006337	869	protein_coding	1	1
10	16132857	16132988	-	16132859	40	256	extended	Zm00001d023700	Zm00001d023700_T001	62	16132921-16135404	16132921-16135404	156	protein_coding	132	20
10	16134896	16134896	-	16134896	8	8	intron	Zm00001d023700	Zm00001d023700_T001	0	16132921-16135404	16132921-16135404	156	protein_coding	1	1
10	16134947	16134947	-	16134947	5	5	intron	Zm00001d023700	Zm00001d023700_T001	0	16132921-16135404	16132921-16135404	156	protein_coding	1	1
10	16135010	16135010	-	16135010	3	3	intron	Zm00001d023700	Zm00001d023700_T001	0	16132921-16135404	16132921-16135404	156	protein_coding	1	1
10	16135236	16135246	-	16135236	4	8	5UTR	Zm00001d023700	Zm00001d023700_T001	0	16132921-16135404	16132921-16135404	156	protein_coding	11	2
10	16366186	16366186	-	16366186	4	4	3UTR	Zm00001d023704	Zm00001d023704_T001	0	16366024-16371198	16366024-16371198	452	protein_coding	1	1
10	16408751	16408788	-	16408785	39	68	intron	Zm00001d023707	Zm00001d023707_T001	0	16408714-16409661	16408714-16409698	127	protein_coding	38	6
10	16697154	16697154	-	16697154	4	4	intergenic	Zm00001d023716	Zm00001d023716_T001	2865	16700019-16705807	16700019-16705807	0	protein_coding	1	1
10	16710295	16710295	-	16710295	3	3	intron	Zm00001d023717	Zm00001d023717_T001	0	16709998-16713446	16709998-16713446	0	protein_coding	1	1
10	16710844	16710855	-	16710844	6	10	intron	Zm00001d023717	Zm00001d023717_T001	0	16709998-16713446	16709998-16713446	0	protein_coding	12	2
10	16710905	16710934	-	16710905	6	17	intron	Zm00001d023717	Zm00001d023717_T001	0	16709998-16713446	16709998-16713446	0	protein_coding	30	4
10	16711000	16711012	-	16711011	11	24	intron	Zm00001d023717	Zm00001d023717_T001	0	16709998-16713446	16709998-16713446	0	protein_coding	13	3
10	16865020	16865020	-	16865020	7	7	extended	Zm00001d023721	Zm00001d023721_T001	74	16865094-16869364	16865094-16869364	276	protein_coding	1	1
10	16865132	16865132	-	16865132	3	3	3UTR	Zm00001d023721	Zm00001d023721_T001	0	16865094-16869364	16865094-16869364	276	protein_coding	1	1
10	17846668	17846674	-	17846673	8	20	extended	Zm00001d023733	Zm00001d023733_T001	2	17846675-17851927	17846675-17851927	282	protein_coding	7	3
10	17846725	17846838	-	17846752	128	858	3UTR	Zm00001d023733	Zm00001d023733_T001	0	17846675-17851927	17846675-17851927	282	protein_coding	114	34
10	17846924	17846924	-	17846924	4	4	3UTR	Zm00001d023733	Zm00001d023733_T001	0	17846675-17851927	17846675-17851927	282	protein_coding	1	1
10	17846967	17846967	-	17846967	3	3	CDS	Zm00001d023733	Zm00001d023733_T001	0	17846675-17851927	17846675-17851927	282	protein_coding	1	1
10	17851095	17851095	-	17851095	4	4	intron	Zm00001d023733	Zm00001d023733_T001	0	17846675-17851927	17846675-17851927	282	protein_coding	1	1
10	17851181	17851181	-	17851181	6	6	intron	Zm00001d023733	Zm00001d023733_T001	0	17846675-17851927	17846675-17851927	282	protein_coding	1	1
10	17851264	17851264	-	17851264	4	4	intron	Zm00001d023733	Zm00001d023733_T001	0	17846675-17851927	17846675-17851927	282	protein_coding	1	1
10	18036173	18036173	-	18036173	17	17	intergenic	Zm00001d023738	Zm00001d023738_T001	47274	18083447-18098690	18083447-18098690	352	protein_coding	1	1
10	18082454	18082454	-	18082454	4	4	intergenic	Zm00001d023738	Zm00001d023738_T001	993	18083447-18098690	18083447-18098690	352	protein_coding	1	1
10	18082552	18082552	-	18082552	4	4	intergenic	Zm00001d023738	Zm00001d023738_T001	895	18083447-18098690	18083447-18098690	352	protein_coding	1	1
10	18083396	18083683	-	18083665	163	1994	3UTR	Zm00001d023738	Zm00001d023738_T001	0	18083447-18098690	18083447-18098690	352	protein_coding	288	86
10	18188980	18188980	-	18188980	14	14	extended	Zm00001d023740	Zm00001d023740_T001	191	18189171-18190277	18189171-18190277	0	protein_coding	1	1
10	18189008	18189107	-	18189045	138	373	extended	Zm00001d023740	Zm00001d023740_T001	126	18189171-18190277	18189171-18190277	0	protein_coding	100	16
10	18388814	18388814	-	18388814	6	6	extended	Zm00001d023741	Zm00001d023741_T005	6	18388820-18406345	18388820-18406345	2682	protein_coding	1	1
10	18388887	18388918	-	18388896	8	24	3UTR	Zm00001d023741	Zm00001d023741_T005	0	18388820-18406345	18388820-18406345	2682	protein_coding	32	4
10	18388965	18389219	-	18389149	1444	4656	3UTR	Zm00001d023741	Zm00001d023741_T005	0	18388820-18406345	18388820-18406345	2682	protein_coding	255	78
10	18389248	18389248	-	18389248	3	3	3UTR	Zm00001d023741	Zm00001d023741_T005	0	18388820-18406345	18388820-18406345	2682	protein_coding	1	1
10	18390796	18390796	-	18390796	5	5	intron	Zm00001d023741	Zm00001d023741_T005	0	18388820-18406345	18388820-18406345	2682	protein_coding	1	1
10	18402470	18402470	-	18402470	5	5	intron	Zm00001d023741	Zm00001d023741_T005	0	18388820-18406345	18388820-18406345	2682	protein_coding	1	1
10	18405536	18405536	-	18405536	4	4	intron	Zm00001d023741	Zm00001d023741_T005	0	18388820-18406345	18388820-18406345	2682	protein_coding	1	1
10	18613142	18613142	-	18613142	4	4	intergenic	Zm00001d023749	Zm00001d023749_T001	363	18613505-18627255	18613505-18627300	358	protein_coding	1	1
10	18613505	18613515	-	18613514	11	24	3UTR	Zm00001d023749	Zm00001d023749_T001	0	18613505-18627255	18613505-18627300	358	protein_coding	11	4
10	18613550	18613718	-	18613585	404	2020	3UTR	Zm00001d023749	Zm00001d023749_T001	0	18613505-18627255	18613505-18627300	358	protein_coding	169	52
10	18613745	18613786	-	18613745	18	58	3UTR	Zm00001d023749	Zm00001d023749_T001	0	18613505-18627255	18613505-18627300	358	protein_coding	42	8
10	18678871	18678871	-	18678871	3	3	extended	Zm00001d023753	Zm00001d023753_T001	200	18679071-18679802	18679071-18679802	0	protein_coding	1	1
10	18682943	18682990	-	18682987	41	115	intergenic	Zm00001d023753	Zm00001d023753_T001	3916	18679071-18679802	18679071-18679802	0	protein_coding	48	10
10	18770450	18770450	-	18770450	3	3	intergenic	Zm00001d023754	Zm00001d023754_T001	19313	18789763-18798007	18789763-18798007	0	protein_coding	1	1
10	18770572	18770576	-	18770574	13	32	intergenic	Zm00001d023754	Zm00001d023754_T001	19189	18789763-18798007	18789763-18798007	0	protein_coding	5	3
10	19079352	19079352	-	19079352	3	3	intergenic	Zm00001d023762	Zm00001d023762_T001	109831	19189183-19193087	19189183-19193087	298	protein_coding	1	1
10	19189077	19189222	-	19189203	44	219	3UTR	Zm00001d023762	Zm00001d023762_T001	0	19189183-19193087	19189183-19193087	298	protein_coding	146	20
10	19189268	19189274	-	19189274	10	16	3UTR	Zm00001d023762	Zm00001d023762_T001	0	19189183-19193087	19189183-19193087	298	protein_coding	7	2
10	19189307	19189427	-	19189311	29	103	3UTR	Zm00001d023762	Zm00001d023762_T001	0	19189183-19193087	19189183-19193087	298	protein_coding	121	11
10	19189778	19189778	-	19189778	3	3	intron	Zm00001d023762	Zm00001d023762_T001	0	19189183-19193087	19189183-19193087	298	protein_coding	1	1
10	19780262	19780262	-	19780262	3	3	intergenic	Zm00001d023776	Zm00001d023776_T001	5361	19785623-19786418	19785623-19786418	450	protein_coding	1	1
10	19951934	19951934	-	19951934	3	3	3UTR	Zm00001d023781	Zm00001d023781_T001	0	19951902-19954382	19951902-19954382	254	protein_coding	1	1
10	19951962	19951962	-	19951962	5	5	3UTR	Zm00001d023781	Zm00001d023781_T001	0	19951902-19954382	19951902-19954382	254	protein_coding	1	1
10	20016733	20016733	-	20016733	9	9	3UTR	Zm00001d023784	Zm00001d023784_T001	0	20016631-20026092	20016631-20026092	515	protein_coding	1	1
10	20016831	20016831	-	20016831	5	5	3UTR	Zm00001d023784	Zm00001d023784_T001	0	20016631-20026092	20016631-20026092	515	protein_coding	1	1
10	20294620	20294680	-	20294678	23	64	3UTR	Zm00001d023788	Zm00001d023788_T001	0	20294622-20305450	20294622-20305450	323	protein_coding	61	8
10	20294708	20294744	-	20294708	6	20	3UTR	Zm00001d023788	Zm00001d023788_T001	0	20294622-20305450	20294622-20305450	323	protein_coding	37	4
10	20297132	20297132	-	20297132	4	4	intron	Zm00001d023788	Zm00001d023788_T001	0	20294622-20305450	20294622-20305450	323	protein_coding	1	1
10	21132415	21132428	-	21132416	8	15	intergenic	Zm00001d023795	Zm00001d023795_T006	60328	21192744-21209421	21192744-21209454	369	protein_coding	14	3
10	21192689	21192830	-	21192744	1786	3149	3UTR	Zm00001d023795	Zm00001d023795_T006	0	21192744-21209421	21192744-21209454	369	protein_coding	142	34
10	21192872	21192958	-	21192912	342	1192	3UTR	Zm00001d023795	Zm00001d023795_T006	0	21192744-21209421	21192744-21209454	369	protein_coding	87	32
10	21193026	21193031	-	21193026	19	27	3UTR	Zm00001d023795	Zm00001d023795_T006	0	21192744-21209421	21192744-21209454	369	protein_coding	6	3
10	21208624	21208624	-	21208624	3	3	intron	Zm00001d023795	Zm00001d023795_T006	0	21192744-21209421	21192744-21209454	369	protein_coding	1	1
10	21897505	21897505	-	21897505	3	3	intergenic	Zm00001d023075	Zm00001d023075_T001	31866	21929371-21929977	21929371-21929977	0	lincRNA	1	1
10	22055458	22055514	-	22055506	88	136	extended	Zm00001d023799	Zm00001d023799_T001	14	22055520-22056952	22055520-22056952	324	protein_coding	57	7
10	22055546	22055586	-	22055575	102	231	3UTR	Zm00001d023799	Zm00001d023799_T001	0	22055520-22056952	22055520-22056952	324	protein_coding	41	13
10	22055701	22055743	-	22055726	21	44	3UTR	Zm00001d023799	Zm00001d023799_T001	0	22055520-22056952	22055520-22056952	324	protein_coding	43	5
10	22055801	22055801	-	22055801	3	3	3UTR	Zm00001d023799	Zm00001d023799_T001	0	22055520-22056952	22055520-22056952	324	protein_coding	1	1
10	22188799	22188818	-	22188813	34	54	3UTR	Zm00001d023801	Zm00001d023801_T002	0	22188803-22205430	22188803-22205430	351	protein_coding	20	4
10	22188844	22188844	-	22188844	5	5	3UTR	Zm00001d023801	Zm00001d023801_T002	0	22188803-22205430	22188803-22205430	351	protein_coding	1	1
10	22188873	22189057	-	22188937	360	1186	3UTR	Zm00001d023801	Zm00001d023801_T002	0	22188803-22205430	22188803-22205430	351	protein_coding	185	35
10	22189422	22189427	-	22189427	12	24	intron	Zm00001d023801	Zm00001d023801_T002	0	22188803-22205430	22188803-22205430	351	protein_coding	6	3
10	22391273	22391303	-	22391273	13	25	extended	Zm00001d023804	Zm00001d023804_T001	171	22391444-22391719	22391444-22391719	0	protein_coding	31	5
10	22635064	22635064	-	22635064	4	4	intergenic	Zm00001d023808	Zm00001d023808_T001	33031	22668095-22675337	22668095-22675337	429	protein_coding	1	1
10	22668095	22668095	-	22668095	26	26	3UTR	Zm00001d023808	Zm00001d023808_T001	0	22668095-22675337	22668095-22675337	429	protein_coding	1	1
10	22668198	22668274	-	22668224	1131	1732	3UTR	Zm00001d023808	Zm00001d023808_T001	0	22668095-22675337	22668095-22675337	429	protein_coding	77	24
10	22668305	22668342	-	22668305	12	35	3UTR	Zm00001d023808	Zm00001d023808_T001	0	22668095-22675337	22668095-22675337	429	protein_coding	38	5
10	22669119	22669119	-	22669119	5	5	intron	Zm00001d023808	Zm00001d023808_T001	0	22668095-22675337	22668095-22675337	429	protein_coding	1	1
10	22869645	22869645	-	22869645	3	3	3UTR	Zm00001d023811	Zm00001d023811_T001	0	22869495-22870557	22869495-22870557	408	protein_coding	1	1
10	22946069	22946069	-	22946069	5	5	intergenic	Zm00001d023813	Zm00001d023813_T001	2227	22948296-22951424	22948296-22951424	445	protein_coding	1	1
10	22947080	22947080	-	22947080	3	3	intergenic	Zm00001d023813	Zm00001d023813_T001	1216	22948296-22951424	22948296-22951424	445	protein_coding	1	1
10	22947107	22947113	-	22947107	9	15	intergenic	Zm00001d023813	Zm00001d023813_T001	1189	22948296-22951424	22948296-22951424	445	protein_coding	7	2
10	22948325	22948373	-	22948360	140	396	3UTR	Zm00001d023813	Zm00001d023813_T001	0	22948296-22951424	22948296-22951424	445	protein_coding	49	12
10	22948408	22948443	-	22948408	7	15	3UTR	Zm00001d023813	Zm00001d023813_T001	0	22948296-22951424	22948296-22951424	445	protein_coding	36	3
10	23122288	23122288	-	23122288	4	4	intergenic	Zm00001d023813	Zm00001d023813_T001	173992	22948296-22951424	22948296-22951424	445	protein_coding	1	1
10	23332452	23332484	-	23332460	78	130	3UTR	Zm00001d023817	Zm00001d023817_T001	0	23332450-23345034	23332450-23345034	272	protein_coding	33	9
10	23415687	23415687	-	23415687	3	3	extended	Zm00001d023819	Zm00001d023819_T001	17	23415704-23415777	23415704-23415777	0	tRNA	1	1
10	23416402	23416406	-	23416402	8	11	extended	Zm00001d023820	Zm00001d023820_T001	94	23416496-23420812	23416496-23420812	0	protein_coding	5	2
10	23416435	23416438	-	23416435	30	57	extended	Zm00001d023820	Zm00001d023820_T001	61	23416496-23420812	23416496-23420812	0	protein_coding	4	2
10	23416475	23416475	-	23416475	6	6	extended	Zm00001d023820	Zm00001d023820_T001	21	23416496-23420812	23416496-23420812	0	protein_coding	1	1
10	23507016	23507016	-	23507016	4	4	extended	Zm00001d023824	Zm00001d023824_T002	37	23507053-23509335	23507053-23509335	267	protein_coding	1	1
10	23507051	23507228	-	23507111	482	1863	3UTR	Zm00001d023824	Zm00001d023824_T002	0	23507053-23509335	23507053-23509335	267	protein_coding	178	45
10	23507519	23507519	-	23507519	3	3	CDS	Zm00001d023824	Zm00001d023824_T002	0	23507053-23509335	23507053-23509335	267	protein_coding	1	1
10	23585421	23585421	-	23585421	3	3	extended	Zm00001d023825	Zm00001d023825_T001	57	23585478-23590215	23585478-23590215	361	protein_coding	1	1
10	23585495	23585592	-	23585505	75	224	3UTR	Zm00001d023825	Zm00001d023825_T001	0	23585478-23590215	23585478-23590215	361	protein_coding	98	13
10	23585630	23585630	-	23585630	4	4	3UTR	Zm00001d023825	Zm00001d023825_T001	0	23585478-23590215	23585478-23590215	361	protein_coding	1	1
10	23585695	23585695	-	23585695	11	11	3UTR	Zm00001d023825	Zm00001d023825_T001	0	23585478-23590215	23585478-23590215	361	protein_coding	1	1
10	23585733	23585734	-	23585734	5	9	intron	Zm00001d023825	Zm00001d023825_T001	0	23585478-23590215	23585478-23590215	361	protein_coding	2	2
10	23764469	23764539	-	23764469	86	215	3UTR	Zm00001d023833	Zm00001d023833_T003	0	23764466-23769933	23764459-23769933	267	protein_coding	71	10
10	23764572	23764572	-	23764572	4	4	3UTR	Zm00001d023833	Zm00001d023833_T003	0	23764466-23769933	23764459-23769933	267	protein_coding	1	1
10	23764613	23764613	-	23764613	3	3	3UTR	Zm00001d023833	Zm00001d023833_T003	0	23764466-23769933	23764459-23769933	267	protein_coding	1	1
10	23887377	23887450	-	23887382	35	231	3UTR	Zm00001d023838	Zm00001d023838_T002	0	23887314-23897377	23887314-23897377	3796	protein_coding	74	18
10	23887482	23887555	-	23887525	202	550	3UTR	Zm00001d023838	Zm00001d023838_T002	0	23887314-23897377	23887314-23897377	3796	protein_coding	74	18
10	23887586	23887678	-	23887625	48	196	3UTR	Zm00001d023838	Zm00001d023838_T002	0	23887314-23897377	23887314-23897377	3796	protein_coding	93	18
10	23887720	23887720	-	23887720	3	3	3UTR	Zm00001d023838	Zm00001d023838_T002	0	23887314-23897377	23887314-23897377	3796	protein_coding	1	1
10	23887783	23887791	-	23887783	9	12	3UTR	Zm00001d023838	Zm00001d023838_T002	0	23887314-23897377	23887314-23897377	3796	protein_coding	9	2
10	23892106	23892106	-	23892106	4	4	3UTR	Zm00001d023838	Zm00001d023838_T002	0	23887314-23897377	23887314-23897377	3796	protein_coding	1	1
10	23892177	23892178	-	23892177	3	6	3UTR	Zm00001d023838	Zm00001d023838_T002	0	23887314-23897377	23887314-23897377	3796	protein_coding	2	2
10	23898538	23898649	-	23898583	293	720	3UTR	Zm00001d023839	Zm00001d023839_T002	0	23898579-23909591	23898579-23909591	246	protein_coding	112	30
10	23907369	23907369	-	23907369	3	3	intron	Zm00001d023839	Zm00001d023839_T002	0	23898579-23909591	23898579-23909591	246	protein_coding	1	1
10	24286774	24286804	-	24286799	73	148	3UTR	Zm00001d023843	Zm00001d023843_T001	0	24286776-24290769	24286776-24290769	294	protein_coding	31	7
10	24286848	24286848	-	24286848	11	11	3UTR	Zm00001d023843	Zm00001d023843_T001	0	24286776-24290769	24286776-24290769	294	protein_coding	1	1
10	24286873	24286877	-	24286873	3	6	3UTR	Zm00001d023843	Zm00001d023843_T001	0	24286776-24290769	24286776-24290769	294	protein_coding	5	2
10	24286902	24286988	-	24286949	29	101	3UTR	Zm00001d023843	Zm00001d023843_T001	0	24286776-24290769	24286776-24290769	294	protein_coding	87	14
10	24287575	24287575	-	24287575	7	7	intron	Zm00001d023843	Zm00001d023843_T001	0	24286776-24290769	24286776-24290769	294	protein_coding	1	1
10	25081655	25081708	-	25081701	43	76	3UTR	Zm00001d023853	Zm00001d023853_T001	0	25081643-25084377	25081643-25084377	426	protein_coding	54	7
10	25081770	25081770	-	25081770	3	3	3UTR	Zm00001d023853	Zm00001d023853_T001	0	25081643-25084377	25081643-25084377	426	protein_coding	1	1
10	25081808	25081808	-	25081808	4	4	3UTR	Zm00001d023853	Zm00001d023853_T001	0	25081643-25084377	25081643-25084377	426	protein_coding	1	1
10	25081917	25081919	-	25081917	6	9	3UTR	Zm00001d023853	Zm00001d023853_T001	0	25081643-25084377	25081643-25084377	426	protein_coding	3	2
10	25245466	25245490	-	25245468	11	18	intron	Zm00001d023858	Zm00001d023858_T001	0	25245123-25248692	25245123-25248808	0	protein_coding	25	3
10	25245524	25245549	-	25245532	117	309	intron	Zm00001d023858	Zm00001d023858_T001	0	25245123-25248692	25245123-25248808	0	protein_coding	26	13
10	25283891	25283902	-	25283891	95	151	3UTR	Zm00001d023859	Zm00001d023859_T001	0	25283888-25287483	25283888-25287483	276	protein_coding	12	6
10	25283951	25283976	-	25283951	18	36	3UTR	Zm00001d023859	Zm00001d023859_T001	0	25283888-25287483	25283888-25287483	276	protein_coding	26	5
10	25284006	25284051	-	25284016	70	156	3UTR	Zm00001d023859	Zm00001d023859_T001	0	25283888-25287483	25283888-25287483	276	protein_coding	46	8
10	25327584	25327622	-	25327621	7	20	extended	Zm00001d023862	Zm00001d023862_T001	409	25327212-25327282	25327212-25327282	0	tRNA	39	4
10	25327648	25327648	-	25327648	6	6	extended	Zm00001d023862	Zm00001d023862_T001	436	25327212-25327282	25327212-25327282	0	tRNA	1	1
10	25327709	25327709	-	25327709	4	4	intergenic	Zm00001d023862	Zm00001d023862_T001	497	25327212-25327282	25327212-25327282	0	tRNA	1	1
10	25327734	25327738	-	25327734	4	8	intergenic	Zm00001d023862	Zm00001d023862_T001	522	25327212-25327282	25327212-25327282	0	tRNA	5	2
10	25327772	25327772	-	25327772	8	8	intergenic	Zm00001d023862	Zm00001d023862_T001	560	25327212-25327282	25327212-25327282	0	tRNA	1	1
10	25367573	25367573	-	25367573	11	11	extended	Zm00001d023863	Zm00001d023863_T001	161	25367734-25368630	25367734-25368630	0	protein_coding	1	1
10	25417384	25417384	-	25417384	4	4	3UTR	Zm00001d023865	Zm00001d023865_T001	0	25417359-25421335	25417359-25421335	531	protein_coding	1	1
10	25417515	25417515	-	25417515	3	3	3UTR	Zm00001d023865	Zm00001d023865_T001	0	25417359-25421335	25417359-25421335	531	protein_coding	1	1
10	25417570	25417570	-	25417570	8	8	3UTR	Zm00001d023865	Zm00001d023865_T001	0	25417359-25421335	25417359-25421335	531	protein_coding	1	1
10	25417596	25417648	-	25417645	90	308	3UTR	Zm00001d023865	Zm00001d023865_T001	0	25417359-25421335	25417359-25421335	531	protein_coding	53	14
10	25417677	25417702	-	25417677	41	109	3UTR	Zm00001d023865	Zm00001d023865_T001	0	25417359-25421335	25417359-25421335	531	protein_coding	26	7
10	25417732	25417752	-	25417732	54	117	3UTR	Zm00001d023865	Zm00001d023865_T001	0	25417359-25421335	25417359-25421335	531	protein_coding	21	5
10	25417788	25417812	-	25417794	26	46	3UTR	Zm00001d023865	Zm00001d023865_T001	0	25417359-25421335	25417359-25421335	531	protein_coding	25	4
10	25595493	25595507	-	25595506	215	253	3UTR	Zm00001d023868	Zm00001d023868_T004	0	25595490-25600235	25595490-25600235	265	protein_coding	15	5
10	25595572	25595589	-	25595581	6	18	3UTR	Zm00001d023868	Zm00001d023868_T004	0	25595490-25600235	25595490-25600235	265	protein_coding	18	4
10	25595623	25595623	-	25595623	3	3	3UTR	Zm00001d023868	Zm00001d023868_T004	0	25595490-25600235	25595490-25600235	265	protein_coding	1	1
10	25872002	25872002	-	25872002	9	9	extended	Zm00001d023873	Zm00001d023873_T001	394	25872396-25872710	25872396-25872710	0	protein_coding	1	1
10	25936470	25936470	-	25936470	3	3	3UTR	Zm00001d023874	Zm00001d023874_T001	0	25936465-25942972	25936465-25942972	495	protein_coding	1	1
10	25936500	25936500	-	25936500	4	4	3UTR	Zm00001d023874	Zm00001d023874_T001	0	25936465-25942972	25936465-25942972	495	protein_coding	1	1
10	25936566	25936699	-	25936594	273	1597	3UTR	Zm00001d023874	Zm00001d023874_T001	0	25936465-25942972	25936465-25942972	495	protein_coding	134	55
10	26009683	26009683	-	26009683	3	3	intergenic	Zm00001d023874	Zm00001d023874_T001	73218	25936465-25942972	25936465-25942972	495	protein_coding	1	1
10	26191686	26191686	-	26191686	3	3	extended	Zm00001d023880	Zm00001d023880_T002	142	26191828-26194467	26191828-26194467	206	protein_coding	1	1
10	26191753	26191770	-	26191770	4	7	extended	Zm00001d023880	Zm00001d023880_T002	58	26191828-26194467	26191828-26194467	206	protein_coding	18	2
10	26191795	26191810	-	26191810	25	46	extended	Zm00001d023880	Zm00001d023880_T002	18	26191828-26194467	26191828-26194467	206	protein_coding	16	2
10	26191920	26191959	-	26191950	185	244	3UTR	Zm00001d023880	Zm00001d023880_T002	0	26191828-26194467	26191828-26194467	206	protein_coding	40	10
10	26192224	26192260	-	26192231	6	27	CDS	Zm00001d023880	Zm00001d023880_T002	0	26191828-26194467	26191828-26194467	206	protein_coding	37	7
10	26193882	26193882	-	26193882	4	4	intron	Zm00001d023880	Zm00001d023880_T002	0	26191828-26194467	26191828-26194467	206	protein_coding	1	1
10	26202810	26202816	-	26202810	12	18	intergenic	Zm00001d023882	Zm00001d023882_T001	1879	26204689-26207745	26204689-26207745	255	protein_coding	7	2
10	26204723	26204723	-	26204723	5	5	3UTR	Zm00001d023882	Zm00001d023882_T001	0	26204689-26207745	26204689-26207745	255	protein_coding	1	1
10	26305382	26305402	-	26305396	38	149	3UTR	Zm00001d023885	Zm00001d023885_T002	0	26305370-26308881	26305370-26308988	345	protein_coding	21	12
10	26305449	26305578	-	26305497	60	267	3UTR	Zm00001d023885	Zm00001d023885_T002	0	26305370-26308881	26305370-26308988	345	protein_coding	130	18
10	26305609	26305609	-	26305609	3	3	3UTR	Zm00001d023885	Zm00001d023885_T002	0	26305370-26308881	26305370-26308988	345	protein_coding	1	1
10	26305638	26305644	-	26305644	4	7	3UTR	Zm00001d023885	Zm00001d023885_T002	0	26305370-26308881	26305370-26308988	345	protein_coding	7	2
10	26313747	26313747	-	26313747	5	5	intron	Zm00001d023886	Zm00001d023886_T001	0	26309772-26314253	26309772-26314253	0	protein_coding	1	1
10	27502428	27502428	-	27502428	3	3	3UTR	Zm00001d023908	Zm00001d023908_T002	0	27502136-27505505	27502136-27505505	383	protein_coding	1	1
10	27638898	27638941	-	27638898	9	22	extended	Zm00001d023910	Zm00001d023910_T001	124	27639022-27654657	27639022-27654657	252	protein_coding	44	4
10	27639017	27639064	-	27639022	125	258	3UTR	Zm00001d023910	Zm00001d023910_T001	0	27639022-27654657	27639022-27654657	252	protein_coding	48	12
10	27639090	27639111	-	27639111	10	16	3UTR	Zm00001d023910	Zm00001d023910_T001	0	27639022-27654657	27639022-27654657	252	protein_coding	22	3
10	28083097	28083097	-	28083097	3	3	extended	Zm00001d023915	Zm00001d023915_T001	38	28083135-28084982	28083135-28084982	189	protein_coding	1	1
10	28083172	28083213	-	28083178	48	123	3UTR	Zm00001d023915	Zm00001d023915_T001	0	28083135-28084982	28083135-28084982	189	protein_coding	42	9
10	28098083	28098084	-	28098084	4	7	intergenic	Zm00001d023915	Zm00001d023915_T001	14949	28083135-28084982	28083135-28084982	189	protein_coding	2	2
10	28214246	28214246	-	28214246	3	3	intergenic	Zm00001d023919	Zm00001d023919_T001	26088	28240334-28243204	28240334-28243204	0	protein_coding	1	1
10	28240193	28240320	-	28240262	105	234	extended	Zm00001d023919	Zm00001d023919_T001	72	28240334-28243204	28240334-28243204	0	protein_coding	128	24
10	28693132	28693132	-	28693132	3	3	intergenic	Zm00001d023927	Zm00001d023927_T001	512	28693644-28695428	28693644-28695428	0	protein_coding	1	1
10	28693172	28693192	-	28693172	3	6	intergenic	Zm00001d023927	Zm00001d023927_T001	472	28693644-28695428	28693644-28695428	0	protein_coding	21	2
10	28693280	28693323	-	28693280	8	25	extended	Zm00001d023927	Zm00001d023927_T001	364	28693644-28695428	28693644-28695428	0	protein_coding	44	5
10	28693375	28693375	-	28693375	4	4	extended	Zm00001d023927	Zm00001d023927_T001	269	28693644-28695428	28693644-28695428	0	protein_coding	1	1
10	28693400	28693436	-	28693400	12	27	extended	Zm00001d023927	Zm00001d023927_T001	244	28693644-28695428	28693644-28695428	0	protein_coding	37	4
10	28693556	28693556	-	28693556	3	3	extended	Zm00001d023927	Zm00001d023927_T001	88	28693644-28695428	28693644-28695428	0	protein_coding	1	1
10	28693606	28693606	-	28693606	3	3	extended	Zm00001d023927	Zm00001d023927_T001	38	28693644-28695428	28693644-28695428	0	protein_coding	1	1
10	29148240	29148240	-	29148240	29	29	3UTR	Zm00001d023929	Zm00001d023929_T001	0	29148234-29154174	29148234-29154174	313	protein_coding	1	1
10	29148268	29148324	-	29148307	93	269	3UTR	Zm00001d023929	Zm00001d023929_T001	0	29148234-29154174	29148234-29154174	313	protein_coding	57	12
10	29148360	29148434	-	29148389	164	530	3UTR	Zm00001d023929	Zm00001d023929_T001	0	29148234-29154174	29148234-29154174	313	protein_coding	75	20
10	29148463	29148463	-	29148463	18	18	3UTR	Zm00001d023929	Zm00001d023929_T001	0	29148234-29154174	29148234-29154174	313	protein_coding	1	1
10	29997574	29997574	-	29997574	3	3	extended	Zm00001d023934	Zm00001d023934_T003	58	29997632-30002284	29997630-30002284	280	protein_coding	1	1
10	29997630	29997630	-	29997630	3	3	extended	Zm00001d023934	Zm00001d023934_T003	2	29997632-30002284	29997630-30002284	280	protein_coding	1	1
10	29997701	29997732	-	29997703	183	220	3UTR	Zm00001d023934	Zm00001d023934_T003	0	29997632-30002284	29997630-30002284	280	protein_coding	32	5
10	29997819	29997820	-	29997819	4	8	3UTR	Zm00001d023934	Zm00001d023934_T003	0	29997632-30002284	29997630-30002284	280	protein_coding	2	2
10	30683332	30683366	-	30683366	10	23	3UTR	Zm00001d023943	Zm00001d023943_T004	0	30683334-30695018	30683334-30695018	367	protein_coding	35	3
10	30683419	30683425	-	30683419	20	26	3UTR	Zm00001d023943	Zm00001d023943_T004	0	30683334-30695018	30683334-30695018	367	protein_coding	7	2
10	30683468	30683657	-	30683577	658	2850	3UTR	Zm00001d023943	Zm00001d023943_T004	0	30683334-30695018	30683334-30695018	367	protein_coding	190	65
10	30976055	30976055	-	30976055	7	7	intergenic	Zm00001d023946	Zm00001d023946_T001	661	30976716-30980257	30976716-30980257	400	protein_coding	1	1
10	30976578	30976620	-	30976604	35	114	extended	Zm00001d023946	Zm00001d023946_T001	112	30976716-30980257	30976716-30980257	400	protein_coding	43	13
10	30976705	30976743	-	30976722	68	147	3UTR	Zm00001d023946	Zm00001d023946_T001	0	30976716-30980257	30976716-30980257	400	protein_coding	39	6
10	31182974	31182993	-	31182993	9	18	extended	Zm00001d023950	Zm00001d023950_T001	143	31183136-31184065	31183136-31184065	0	protein_coding	20	3
10	31820465	31820465	-	31820465	3	3	intergenic	Zm00001d023957	Zm00001d023957_T006	814	31821279-31827877	31821083-31827877	0	protein_coding	1	1
10	31820828	31820854	-	31820851	26	33	extended	Zm00001d023957	Zm00001d023957_T006	428	31821279-31827877	31821083-31827877	0	protein_coding	27	3
10	31820929	31820929	-	31820929	3	3	extended	Zm00001d023957	Zm00001d023957_T006	350	31821279-31827877	31821083-31827877	0	protein_coding	1	1
10	32089436	32089437	-	32089436	9	15	extended	Zm00001d023962	Zm00001d023962_T001	1	32089437-32094242	32089437-32094242	431	protein_coding	2	2
10	32089465	32089482	-	32089465	22	44	3UTR	Zm00001d023962	Zm00001d023962_T001	0	32089437-32094242	32089437-32094242	431	protein_coding	18	2
10	32089551	32089712	-	32089575	242	860	3UTR	Zm00001d023962	Zm00001d023962_T001	0	32089437-32094242	32089437-32094242	431	protein_coding	162	32
10	32323241	32323258	-	32323241	9	18	3UTR	Zm00001d023964	Zm00001d023964_T001	0	32323177-32326990	32323177-32326990	245	protein_coding	18	3
10	32563911	32563956	-	32563938	22	46	3UTR	Zm00001d023968	Zm00001d023968_T002	0	32563929-32567309	32563929-32567309	247	protein_coding	46	5
10	32563981	32563982	-	32563982	10	13	3UTR	Zm00001d023968	Zm00001d023968_T002	0	32563929-32567309	32563929-32567309	247	protein_coding	2	2
10	32564011	32564037	-	32564014	19	58	3UTR	Zm00001d023968	Zm00001d023968_T002	0	32563929-32567309	32563929-32567309	247	protein_coding	27	4
10	32564068	32564068	-	32564068	4	4	3UTR	Zm00001d023968	Zm00001d023968_T002	0	32563929-32567309	32563929-32567309	247	protein_coding	1	1
10	32585855	32585855	-	32585855	3	3	extended	Zm00001d023969	Zm00001d023969_T001	30	32585885-32588980	32585885-32588980	1591	protein_coding	1	1
10	32585885	32585910	-	32585886	189	233	3UTR	Zm00001d023969	Zm00001d023969_T001	0	32585885-32588980	32585885-32588980	1591	protein_coding	26	6
10	32585939	32585939	-	32585939	7	7	3UTR	Zm00001d023969	Zm00001d023969_T001	0	32585885-32588980	32585885-32588980	1591	protein_coding	1	1
10	32586231	32586231	-	32586231	3	3	intron	Zm00001d023969	Zm00001d023969_T001	0	32585885-32588980	32585885-32588980	1591	protein_coding	1	1
10	33922109	33922109	-	33922109	3	3	extended	Zm00001d023979	Zm00001d023979_T002	28	33922137-33926709	33922137-33926709	517	protein_coding	1	1
10	33922137	33922160	-	33922137	14	19	3UTR	Zm00001d023979	Zm00001d023979_T002	0	33922137-33926709	33922137-33926709	517	protein_coding	24	2
10	33922217	33922332	-	33922292	164	571	3UTR	Zm00001d023979	Zm00001d023979_T002	0	33922137-33926709	33922137-33926709	517	protein_coding	116	23
10	33922402	33922415	-	33922415	12	23	3UTR	Zm00001d023979	Zm00001d023979_T002	0	33922137-33926709	33922137-33926709	517	protein_coding	14	2
10	33922447	33922498	-	33922469	109	137	3UTR	Zm00001d023979	Zm00001d023979_T002	0	33922137-33926709	33922137-33926709	517	protein_coding	52	6
10	33924679	33924679	-	33924679	3	3	intron	Zm00001d023979	Zm00001d023979_T002	0	33922137-33926709	33922137-33926709	517	protein_coding	1	1
10	34235806	34235806	-	34235806	3	3	intergenic	Zm00001d023987	Zm00001d023987_T002	218072	34453878-34465900	34453878-34465900	195	protein_coding	1	1
10	34383654	34383677	-	34383677	5	11	intergenic	Zm00001d023987	Zm00001d023987_T002	70201	34453878-34465900	34453878-34465900	195	protein_coding	24	3
10	34453865	34454020	-	34453956	934	2866	3UTR	Zm00001d023987	Zm00001d023987_T002	0	34453878-34465900	34453878-34465900	195	protein_coding	156	50
10	34454854	34454931	-	34454888	47	101	intron	Zm00001d023987	Zm00001d023987_T002	0	34453878-34465900	34453878-34465900	195	protein_coding	78	6
10	34455002	34455002	-	34455002	4	4	intron	Zm00001d023987	Zm00001d023987_T002	0	34453878-34465900	34453878-34465900	195	protein_coding	1	1
10	34465064	34465064	-	34465064	3	3	intron	Zm00001d023987	Zm00001d023987_T002	0	34453878-34465900	34453878-34465900	195	protein_coding	1	1
10	34465094	34465094	-	34465094	5	5	intron	Zm00001d023987	Zm00001d023987_T002	0	34453878-34465900	34453878-34465900	195	protein_coding	1	1
10	34692883	34692886	-	34692883	18	26	3UTR	Zm00001d023990	Zm00001d023990_T001	0	34692879-34700090	34692879-34700090	215	protein_coding	4	3
10	34692969	34692971	-	34692971	5	9	3UTR	Zm00001d023990	Zm00001d023990_T001	0	34692879-34700090	34692879-34700090	215	protein_coding	3	2
10	34971792	34971792	-	34971792	3	3	extended	Zm00001d023992	Zm00001d023992_T001	130	34971922-34972401	34971922-34972401	0	protein_coding	1	1
10	35222924	35222925	-	35222924	8	12	intergenic	Zm00001d023995	Zm00001d023995_T002	78952	35301876-35306863	35301876-35306863	240	protein_coding	2	2
10	35439407	35439407	-	35439407	4	4	intergenic	Zm00001d023998	Zm00001d023998_T005	2124	35441531-35448839	35441529-35448839	375	protein_coding	1	1
10	35439498	35439508	-	35439498	3	6	intergenic	Zm00001d023998	Zm00001d023998_T005	2033	35441531-35448839	35441529-35448839	375	protein_coding	11	2
10	35440105	35440105	-	35440105	6	6	intergenic	Zm00001d023998	Zm00001d023998_T005	1426	35441531-35448839	35441529-35448839	375	protein_coding	1	1
10	35441529	35441629	-	35441583	34	134	3UTR	Zm00001d023998	Zm00001d023998_T005	0	35441531-35448839	35441529-35448839	375	protein_coding	101	14
10	35441682	35441709	-	35441700	47	168	3UTR	Zm00001d023998	Zm00001d023998_T005	0	35441531-35448839	35441529-35448839	375	protein_coding	28	11
10	35441734	35441750	-	35441750	11	14	3UTR	Zm00001d023998	Zm00001d023998_T005	0	35441531-35448839	35441529-35448839	375	protein_coding	17	2
10	35441799	35441816	-	35441799	11	14	3UTR	Zm00001d023998	Zm00001d023998_T005	0	35441531-35448839	35441529-35448839	375	protein_coding	18	2
10	35445687	35445687	-	35445687	8	8	CDS	Zm00001d023998	Zm00001d023998_T005	0	35441531-35448839	35441529-35448839	375	protein_coding	1	1
10	35858507	35858641	-	35858590	33	163	3UTR	Zm00001d024004	Zm00001d024004_T001	0	35858507-35864183	35858507-35864183	543	protein_coding	135	14
10	35858670	35858670	-	35858670	4	4	3UTR	Zm00001d024004	Zm00001d024004_T001	0	35858507-35864183	35858507-35864183	543	protein_coding	1	1
10	35858747	35858747	-	35858747	3	3	3UTR	Zm00001d024004	Zm00001d024004_T001	0	35858507-35864183	35858507-35864183	543	protein_coding	1	1
10	36110116	36110116	-	36110116	6	6	intergenic	Zm00001d024005	Zm00001d024005_T001	187434	35922682-35924953	35922682-35924953	238	protein_coding	1	1
10	36110230	36110238	-	36110230	6	20	intergenic	Zm00001d024005	Zm00001d024005_T001	187548	35922682-35924953	35922682-35924953	238	protein_coding	9	4
10	37879207	37879207	-	37879207	4	4	extended	Zm00001d024027	Zm00001d024027_T001	280	37879487-37880623	37879487-37880623	0	protein_coding	1	1
10	37879271	37879344	-	37879291	63	181	extended	Zm00001d024027	Zm00001d024027_T001	196	37879487-37880623	37879487-37880623	0	protein_coding	74	13
10	37879381	37879381	-	37879381	3	3	extended	Zm00001d024027	Zm00001d024027_T001	106	37879487-37880623	37879487-37880623	0	protein_coding	1	1
10	37879679	37879679	-	37879679	3	3	CDS	Zm00001d024027	Zm00001d024027_T001	0	37879487-37880623	37879487-37880623	0	protein_coding	1	1
10	37900696	37900696	-	37900696	3	3	intergenic	Zm00001d024027	Zm00001d024027_T001	21209	37879487-37880623	37879487-37880623	0	protein_coding	1	1
10	37902179	37902179	-	37902179	4	4	intergenic	Zm00001d024027	Zm00001d024027_T001	22692	37879487-37880623	37879487-37880623	0	protein_coding	1	1
10	37904788	37904788	-	37904788	6	6	intergenic	Zm00001d024027	Zm00001d024027_T001	25301	37879487-37880623	37879487-37880623	0	protein_coding	1	1
10	38844202	38844207	-	38844202	32	55	extended	Zm00001d024037	Zm00001d024037_T005	2	38844204-38849055	38844199-38849055	208	protein_coding	6	3
10	39073204	39073204	-	39073204	3	3	3UTR	Zm00001d024041	Zm00001d024041_T002	0	39073197-39078744	39073197-39078744	2082	protein_coding	1	1
10	39073348	39073360	-	39073348	4	8	3UTR	Zm00001d024041	Zm00001d024041_T002	0	39073197-39078744	39073197-39078744	2082	protein_coding	13	2
10	39073393	39073494	-	39073423	81	418	3UTR	Zm00001d024041	Zm00001d024041_T002	0	39073197-39078744	39073197-39078744	2082	protein_coding	102	17
10	39073556	39073593	-	39073556	14	40	3UTR	Zm00001d024041	Zm00001d024041_T002	0	39073197-39078744	39073197-39078744	2082	protein_coding	38	4
10	39073645	39073667	-	39073667	5	9	3UTR	Zm00001d024041	Zm00001d024041_T002	0	39073197-39078744	39073197-39078744	2082	protein_coding	23	2
10	39073763	39073778	-	39073763	6	17	3UTR	Zm00001d024041	Zm00001d024041_T002	0	39073197-39078744	39073197-39078744	2082	protein_coding	16	3
10	39074263	39074276	-	39074263	29	54	3UTR	Zm00001d024041	Zm00001d024041_T002	0	39073197-39078744	39073197-39078744	2082	protein_coding	14	5
10	39074344	39074349	-	39074344	8	13	3UTR	Zm00001d024041	Zm00001d024041_T002	0	39073197-39078744	39073197-39078744	2082	protein_coding	6	2
10	39075292	39075400	-	39075326	112	273	3UTR	Zm00001d024041	Zm00001d024041_T002	0	39073197-39078744	39073197-39078744	2082	protein_coding	109	14
10	39765499	39765587	-	39765538	167	353	3UTR	Zm00001d024049	Zm00001d024049_T004	0	39765508-39781464	39765508-39781464	187	protein_coding	89	14
10	39765619	39765619	-	39765619	3	3	3UTR	Zm00001d024049	Zm00001d024049_T004	0	39765508-39781464	39765508-39781464	187	protein_coding	1	1
10	40715430	40715598	-	40715560	268	857	3UTR	Zm00001d024059	Zm00001d024059_T002	0	40715440-40719177	40715440-40719177	269	protein_coding	169	33
10	41073208	41073208	-	41073208	3	3	extended	Zm00001d024066	Zm00001d024066_T001	85	41073293-41087885	41073293-41087885	355	protein_coding	1	1
10	41073278	41073278	-	41073278	5	5	extended	Zm00001d024066	Zm00001d024066_T001	15	41073293-41087885	41073293-41087885	355	protein_coding	1	1
10	41073333	41073382	-	41073333	20	44	3UTR	Zm00001d024066	Zm00001d024066_T001	0	41073293-41087885	41073293-41087885	355	protein_coding	50	6
10	41073440	41073440	-	41073440	4	4	3UTR	Zm00001d024066	Zm00001d024066_T001	0	41073293-41087885	41073293-41087885	355	protein_coding	1	1
10	41073478	41073541	-	41073495	29	85	3UTR	Zm00001d024066	Zm00001d024066_T001	0	41073293-41087885	41073293-41087885	355	protein_coding	64	7
10	41073567	41073572	-	41073570	7	15	3UTR	Zm00001d024066	Zm00001d024066_T001	0	41073293-41087885	41073293-41087885	355	protein_coding	6	3
10	41086592	41086597	-	41086592	7	11	intron	Zm00001d024066	Zm00001d024066_T001	0	41073293-41087885	41073293-41087885	355	protein_coding	6	2
10	41456523	41456523	-	41456523	3	3	intergenic	Zm00001d024071	Zm00001d024071_T001	567	41457090-41458519	41457090-41458519	298	protein_coding	1	1
10	41457091	41457093	-	41457093	48	51	3UTR	Zm00001d024071	Zm00001d024071_T001	0	41457090-41458519	41457090-41458519	298	protein_coding	3	2
10	41457136	41457205	-	41457149	10	27	3UTR	Zm00001d024071	Zm00001d024071_T001	0	41457090-41458519	41457090-41458519	298	protein_coding	70	5
10	41457233	41457233	-	41457233	4	4	3UTR	Zm00001d024071	Zm00001d024071_T001	0	41457090-41458519	41457090-41458519	298	protein_coding	1	1
10	42074499	42074499	-	42074499	4	4	extended	Zm00001d024075	Zm00001d024075_T001	161	42074660-42079454	42074660-42079454	0	protein_coding	1	1
10	42507746	42507752	-	42507746	45	57	3UTR	Zm00001d024083	Zm00001d024083_T001	0	42507737-42511403	42507737-42511403	1041	protein_coding	7	3
10	43766060	43766239	-	43766147	209	567	3UTR	Zm00001d024092	Zm00001d024092_T001	0	43766059-43771787	43766059-43771787	439	protein_coding	180	23
10	43766287	43766328	-	43766287	39	75	3UTR	Zm00001d024092	Zm00001d024092_T001	0	43766059-43771787	43766059-43771787	439	protein_coding	42	7
10	43766539	43766539	-	43766539	4	4	intron	Zm00001d024092	Zm00001d024092_T001	0	43766059-43771787	43766059-43771787	439	protein_coding	1	1
10	43772251	43772251	-	43772251	4	4	3UTR	Zm00001d024093	Zm00001d024093_T001	0	43772159-43777204	43772159-43777204	417	protein_coding	1	1
10	43772377	43772377	-	43772377	5	5	3UTR	Zm00001d024093	Zm00001d024093_T001	0	43772159-43777204	43772159-43777204	417	protein_coding	1	1
10	43772530	43772530	-	43772530	3	3	3UTR	Zm00001d024093	Zm00001d024093_T001	0	43772159-43777204	43772159-43777204	417	protein_coding	1	1
10	43776553	43776553	-	43776553	3	3	intron	Zm00001d024093	Zm00001d024093_T001	0	43772159-43777204	43772159-43777204	417	protein_coding	1	1
10	43776764	43776764	-	43776764	4	4	intron	Zm00001d024093	Zm00001d024093_T001	0	43772159-43777204	43772159-43777204	417	protein_coding	1	1
10	45051089	45051089	-	45051089	8	8	intergenic	Zm00001d024102	Zm00001d024102_T002	686	45051775-45053151	45051775-45053151	0	protein_coding	1	1
10	45051135	45051135	-	45051135	4	4	intergenic	Zm00001d024102	Zm00001d024102_T002	640	45051775-45053151	45051775-45053151	0	protein_coding	1	1
10	45051528	45051528	-	45051528	4	4	extended	Zm00001d024102	Zm00001d024102_T002	247	45051775-45053151	45051775-45053151	0	protein_coding	1	1
10	45051596	45051601	-	45051601	12	17	extended	Zm00001d024102	Zm00001d024102_T002	174	45051775-45053151	45051775-45053151	0	protein_coding	6	2
10	45703253	45703253	-	45703253	3	3	3UTR	Zm00001d024105	Zm00001d024105_T001	0	45703239-45704101	45703239-45704101	233	protein_coding	1	1
10	45703306	45703331	-	45703327	7	13	3UTR	Zm00001d024105	Zm00001d024105_T001	0	45703239-45704101	45703239-45704101	233	protein_coding	26	3
10	46379106	46379106	-	46379106	34	34	intergenic	Zm00001d024110	Zm00001d024110_T001	207546	46171560-46173378	46171560-46173399	835	protein_coding	1	1
10	47124268	47124268	-	47124268	3	3	intergenic	Zm00001d024117	Zm00001d024117_T001	375004	46749264-46749686	46749264-46749686	9	protein_coding	1	1
10	48090213	48090213	-	48090213	13	13	3UTR	Zm00001d024126	Zm00001d024126_T001	0	48089572-48093645	48089572-48093645	981	protein_coding	1	1
10	48090268	48090367	-	48090300	76	192	3UTR	Zm00001d024126	Zm00001d024126_T001	0	48089572-48093645	48089572-48093645	981	protein_coding	100	15
10	48090396	48090418	-	48090418	38	44	3UTR	Zm00001d024126	Zm00001d024126_T001	0	48089572-48093645	48089572-48093645	981	protein_coding	23	2
10	48883275	48883275	-	48883275	3	3	intergenic	Zm00001d024136	Zm00001d024136_T001	51101	48832174-48832245	48832174-48832245	0	tRNA	1	1
10	48883314	48883314	-	48883314	3	3	intergenic	Zm00001d024136	Zm00001d024136_T001	51140	48832174-48832245	48832174-48832245	0	tRNA	1	1
10	48883447	48883447	-	48883447	6	6	intergenic	Zm00001d024136	Zm00001d024136_T001	51273	48832174-48832245	48832174-48832245	0	tRNA	1	1
10	48883573	48883573	-	48883573	3	3	intergenic	Zm00001d024136	Zm00001d024136_T001	51399	48832174-48832245	48832174-48832245	0	tRNA	1	1
10	48883733	48883733	-	48883733	3	3	intergenic	Zm00001d024136	Zm00001d024136_T001	51559	48832174-48832245	48832174-48832245	0	tRNA	1	1
10	48883758	48883758	-	48883758	5	5	intergenic	Zm00001d024136	Zm00001d024136_T001	51584	48832174-48832245	48832174-48832245	0	tRNA	1	1
10	49877479	49877479	-	49877479	3	3	intergenic	Zm00001d024151	Zm00001d024151_T001	94150	49971629-49972114	49971629-49972114	0	protein_coding	1	1
10	51001520	51001520	-	51001520	3	3	intergenic	Zm00001d024158	Zm00001d024158_T004	119601	51121121-51133038	51121121-51133038	3547	protein_coding	1	1
10	51121073	51121073	-	51121073	8	8	extended	Zm00001d024158	Zm00001d024158_T004	48	51121121-51133038	51121121-51133038	3547	protein_coding	1	1
10	51121104	51121247	-	51121124	539	1387	3UTR	Zm00001d024158	Zm00001d024158_T004	0	51121121-51133038	51121121-51133038	3547	protein_coding	144	32
10	51231048	51231048	-	51231048	6	6	extended	Zm00001d024159	Zm00001d024159_T002	30	51231078-51241553	51231078-51241553	386	protein_coding	1	1
10	51231073	51231082	-	51231073	10	13	extended	Zm00001d024159	Zm00001d024159_T002	5	51231078-51241553	51231078-51241553	386	protein_coding	10	2
10	51231136	51231256	-	51231233	51	255	3UTR	Zm00001d024159	Zm00001d024159_T002	0	51231078-51241553	51231078-51241553	386	protein_coding	121	18
10	51231306	51231368	-	51231351	14	35	3UTR	Zm00001d024159	Zm00001d024159_T002	0	51231078-51241553	51231078-51241553	386	protein_coding	63	6
10	51315415	51315418	-	51315418	4	7	3UTR	Zm00001d024160	Zm00001d024160_T003	0	51315314-51327171	51315314-51327171	576	protein_coding	4	2
10	51854679	51854768	-	51854686	133	283	intergenic	Zm00001d024166	Zm00001d024166_T001	45386	51900072-51900674	51900072-51900674	0	protein_coding	90	15
10	52321313	52321383	-	52321350	37	102	3UTR	Zm00001d024169	Zm00001d024169_T001	0	52321108-52329461	52321108-52329461	309	protein_coding	71	8
10	52324109	52324109	-	52324109	3	3	intron	Zm00001d024169	Zm00001d024169_T001	0	52321108-52329461	52321108-52329461	309	protein_coding	1	1
10	52324189	52324189	-	52324189	4	4	CDS	Zm00001d024169	Zm00001d024169_T001	0	52321108-52329461	52321108-52329461	309	protein_coding	1	1
10	52328806	52328806	-	52328806	3	3	intron	Zm00001d024169	Zm00001d024169_T001	0	52321108-52329461	52321108-52329461	309	protein_coding	1	1
10	52657252	52657252	-	52657252	6	6	extended	Zm00001d024170	Zm00001d024170_T001	382	52657634-52660741	52657634-52660741	0	protein_coding	1	1
10	52657283	52657283	-	52657283	3	3	extended	Zm00001d024170	Zm00001d024170_T001	351	52657634-52660741	52657634-52660741	0	protein_coding	1	1
10	52662364	52662386	-	52662364	21	36	3UTR	Zm00001d024171	Zm00001d024171_T003	0	52662145-52669708	52662145-52669708	539	protein_coding	23	2
10	52662419	52662542	-	52662477	173	522	3UTR	Zm00001d024171	Zm00001d024171_T003	0	52662145-52669708	52662145-52669708	539	protein_coding	124	27
10	52662592	52662636	-	52662636	12	29	3UTR	Zm00001d024171	Zm00001d024171_T003	0	52662145-52669708	52662145-52669708	539	protein_coding	45	5
10	53146115	53146116	-	53146116	5	8	intergenic	Zm00001d024175	Zm00001d024175_T001	118921	53027195-53031460	53027195-53031460	247	protein_coding	2	2
10	53430572	53430580	-	53430580	8	11	extended	Zm00001d024178	Zm00001d024178_T002	24	53430604-53434813	53430604-53434813	403	protein_coding	9	2
10	53430740	53430740	-	53430740	3	3	3UTR	Zm00001d024178	Zm00001d024178_T002	0	53430604-53434813	53430604-53434813	403	protein_coding	1	1
10	53473062	53473062	-	53473062	4	4	intergenic	Zm00001d024178	Zm00001d024178_T002	42458	53430604-53434813	53430604-53434813	403	protein_coding	1	1
10	53541095	53541095	-	53541095	13	13	extended	Zm00001d024182	Zm00001d024182_T001	12	53541107-53541179	53541107-53541179	0	tRNA	1	1
10	53894096	53894096	-	53894096	4	4	intergenic	Zm00001d024182	Zm00001d024182_T001	352989	53541107-53541179	53541107-53541179	0	tRNA	1	1
10	54316420	54316420	-	54316420	3	3	intergenic	Zm00001d024189	Zm00001d024189_T001	300875	54617295-54621008	54617295-54621008	0	protein_coding	1	1
10	54316539	54316539	-	54316539	3	3	intergenic	Zm00001d024189	Zm00001d024189_T001	300756	54617295-54621008	54617295-54621008	0	protein_coding	1	1
10	54348613	54348630	-	54348613	5	12	intergenic	Zm00001d024189	Zm00001d024189_T001	268682	54617295-54621008	54617295-54621008	0	protein_coding	18	3
10	55236070	55236070	-	55236070	5	5	intergenic	Zm00001d024200	Zm00001d024200_T001	38105	55274175-55275011	55274175-55275011	0	protein_coding	1	1
10	55273715	55273715	-	55273715	5	5	extended	Zm00001d024200	Zm00001d024200_T001	460	55274175-55275011	55274175-55275011	0	protein_coding	1	1
10	55273833	55273833	-	55273833	3	3	extended	Zm00001d024200	Zm00001d024200_T001	342	55274175-55275011	55274175-55275011	0	protein_coding	1	1
10	55273875	55273875	-	55273875	7	7	extended	Zm00001d024200	Zm00001d024200_T001	300	55274175-55275011	55274175-55275011	0	protein_coding	1	1
10	56446220	56446220	-	56446220	11	11	3UTR	Zm00001d024207	Zm00001d024207_T002	0	56446155-56449468	56446155-56449468	334	protein_coding	1	1
10	56828732	56828755	-	56828754	166	179	extended	Zm00001d024212	Zm00001d024212_T005	1	56828755-56838148	56828755-56838148	1304	protein_coding	24	4
10	56828782	56828872	-	56828806	79	462	3UTR	Zm00001d024212	Zm00001d024212_T005	0	56828755-56838148	56828755-56838148	1304	protein_coding	91	22
10	56828912	56828966	-	56828916	12	59	3UTR	Zm00001d024212	Zm00001d024212_T005	0	56828755-56838148	56828755-56838148	1304	protein_coding	55	10
10	56995500	56995522	-	56995508	57	124	intergenic	Zm00001d024213	Zm00001d024213_T001	1097	56996605-56997874	56996605-56997874	0	protein_coding	23	6
10	56995574	56995580	-	56995580	7	16	intergenic	Zm00001d024213	Zm00001d024213_T001	1025	56996605-56997874	56996605-56997874	0	protein_coding	7	3
10	58069118	58069118	-	58069118	3	3	intergenic	Zm00001d024223	Zm00001d024223_T001	73980	58143098-58144926	58143098-58144926	0	protein_coding	1	1
10	58449969	58449969	-	58449969	12	12	3UTR	Zm00001d024231	Zm00001d024231_T001	0	58449887-58454061	58449887-58454061	299	protein_coding	1	1
10	58450021	58450025	-	58450022	9	20	3UTR	Zm00001d024231	Zm00001d024231_T001	0	58449887-58454061	58449887-58454061	299	protein_coding	5	3
10	59264531	59264586	-	59264582	19	80	3UTR	Zm00001d024245	Zm00001d024245_T001	0	59264330-59271577	59264330-59271577	537	protein_coding	56	10
10	59264613	59264788	-	59264715	4097	13590	3UTR	Zm00001d024245	Zm00001d024245_T001	0	59264330-59271577	59264330-59271577	537	protein_coding	176	87
10	60015959	60015959	-	60015959	3	3	3UTR	Zm00001d024265	Zm00001d024265_T001	0	60015948-60017307	60015948-60017307	176	protein_coding	1	1
10	61030753	61030753	-	61030753	6	6	extended	Zm00001d024274	Zm00001d024274_T003	2	61030755-61038775	61030755-61038775	350	protein_coding	1	1
10	61030784	61030930	-	61030903	1115	4232	3UTR	Zm00001d024274	Zm00001d024274_T003	0	61030755-61038775	61030755-61038775	350	protein_coding	147	65
10	61031013	61031039	-	61031013	3	9	3UTR	Zm00001d024274	Zm00001d024274_T003	0	61030755-61038775	61030755-61038775	350	protein_coding	27	3
10	61213499	61213499	-	61213499	3	3	intergenic	Zm00001d024274	Zm00001d024274_T003	182744	61030755-61038775	61030755-61038775	350	protein_coding	1	1
10	61486918	61486925	-	61486918	4	7	extended	Zm00001d024281	Zm00001d024281_T001	10	61486928-61491037	61486928-61491037	308	protein_coding	8	2
10	61486950	61487015	-	61487014	29	72	3UTR	Zm00001d024281	Zm00001d024281_T001	0	61486928-61491037	61486928-61491037	308	protein_coding	66	6
10	61487056	61487074	-	61487068	28	72	3UTR	Zm00001d024281	Zm00001d024281_T001	0	61486928-61491037	61486928-61491037	308	protein_coding	19	7
10	61716092	61716092	-	61716092	5	5	intron	Zm00001d024285	Zm00001d024285_T001	0	61712124-61716615	61712124-61716615	0	protein_coding	1	1
10	61827387	61827401	-	61827387	78	100	intergenic	Zm00001d024286	Zm00001d024286_T001	94282	61733105-61735178	61733105-61735178	0	protein_coding	15	7
10	62317297	62317329	-	62317329	21	35	3UTR	Zm00001d024292	Zm00001d024292_T002	0	62317297-62320708	62317297-62320708	287	protein_coding	33	4
10	62317372	62317377	-	62317372	53	58	3UTR	Zm00001d024292	Zm00001d024292_T002	0	62317297-62320708	62317297-62320708	287	protein_coding	6	2
10	62317402	62317478	-	62317409	377	674	3UTR	Zm00001d024292	Zm00001d024292_T002	0	62317297-62320708	62317297-62320708	287	protein_coding	77	14
10	62336620	62336620	-	62336620	3	3	extended	Zm00001d024293	Zm00001d024293_T001	12	62336632-62337514	62336632-62337514	138	protein_coding	1	1
10	62512730	62512807	-	62512730	55	237	extended	Zm00001d024294	Zm00001d024294_T001	1	62512731-62514813	62512731-62514813	200	protein_coding	78	16
10	62512836	62512855	-	62512836	6	9	3UTR	Zm00001d024294	Zm00001d024294_T001	0	62512731-62514813	62512731-62514813	200	protein_coding	20	2
10	62513761	62513761	-	62513761	3	3	intron	Zm00001d024294	Zm00001d024294_T001	0	62512731-62514813	62512731-62514813	200	protein_coding	1	1
10	62902286	62902313	-	62902289	31	80	3UTR	Zm00001d024302	Zm00001d024302_T001	0	62902288-62903162	62902288-62903162	184	protein_coding	28	7
10	63452554	63452582	-	63452564	100	141	intergenic	Zm00001d024311	Zm00001d024311_T001	680	63453244-63457463	63453244-63457463	0	protein_coding	29	6
10	63452616	63452665	-	63452616	10	34	intergenic	Zm00001d024311	Zm00001d024311_T001	628	63453244-63457463	63453244-63457463	0	protein_coding	50	5
10	63452710	63452741	-	63452710	11	19	intergenic	Zm00001d024311	Zm00001d024311_T001	534	63453244-63457463	63453244-63457463	0	protein_coding	32	3
10	63453245	63453299	-	63453299	25	128	intron	Zm00001d024311	Zm00001d024311_T001	0	63453244-63457463	63453244-63457463	0	protein_coding	55	12
10	63453325	63453343	-	63453325	30	33	intron	Zm00001d024311	Zm00001d024311_T001	0	63453244-63457463	63453244-63457463	0	protein_coding	19	2
10	63453371	63453371	-	63453371	3	3	intron	Zm00001d024311	Zm00001d024311_T001	0	63453244-63457463	63453244-63457463	0	protein_coding	1	1
10	63672416	63672416	-	63672416	4	4	extended	Zm00001d024314	Zm00001d024314_T001	4	63672420-63675196	63672420-63675196	300	protein_coding	1	1
10	63672490	63672500	-	63672500	8	12	3UTR	Zm00001d024314	Zm00001d024314_T001	0	63672420-63675196	63672420-63675196	300	protein_coding	11	2
10	63998317	63998317	-	63998317	3	3	extended	Zm00001d024317	Zm00001d024317_T001	165	63998482-64015910	63998482-64015910	0	protein_coding	1	1
10	64272552	64272552	-	64272552	3	3	intergenic	Zm00001d024321	Zm00001d024321_T001	105649	64378201-64379576	64378201-64379576	138	protein_coding	1	1
10	64354351	64354351	-	64354351	4	4	intergenic	Zm00001d024321	Zm00001d024321_T001	23850	64378201-64379576	64378201-64379576	138	protein_coding	1	1
10	64365986	64366009	-	64365992	9	18	intergenic	Zm00001d024321	Zm00001d024321_T001	12209	64378201-64379576	64378201-64379576	138	protein_coding	24	3
10	64366035	64366082	-	64366070	198	763	intergenic	Zm00001d024321	Zm00001d024321_T001	12131	64378201-64379576	64378201-64379576	138	protein_coding	48	20
10	64622730	64622730	-	64622730	5	5	intergenic	Zm00001d024325	Zm00001d024325_T001	46892	64669622-64684686	64669622-64684686	976	protein_coding	1	1
10	64669855	64669855	-	64669855	3	3	3UTR	Zm00001d024325	Zm00001d024325_T001	0	64669622-64684686	64669622-64684686	976	protein_coding	1	1
10	64670096	64670105	-	64670096	7	16	3UTR	Zm00001d024325	Zm00001d024325_T001	0	64669622-64684686	64669622-64684686	976	protein_coding	10	3
10	64670146	64670146	-	64670146	35	35	3UTR	Zm00001d024325	Zm00001d024325_T001	0	64669622-64684686	64669622-64684686	976	protein_coding	1	1
10	64670171	64670249	-	64670227	23	82	3UTR	Zm00001d024325	Zm00001d024325_T001	0	64669622-64684686	64669622-64684686	976	protein_coding	79	9
10	64670286	64670286	-	64670286	4	4	3UTR	Zm00001d024325	Zm00001d024325_T001	0	64669622-64684686	64669622-64684686	976	protein_coding	1	1
10	64670411	64670424	-	64670420	8	18	3UTR	Zm00001d024325	Zm00001d024325_T001	0	64669622-64684686	64669622-64684686	976	protein_coding	14	4
10	64683863	64683863	-	64683863	3	3	intron	Zm00001d024325	Zm00001d024325_T001	0	64669622-64684686	64669622-64684686	976	protein_coding	1	1
10	64683907	64683907	-	64683907	4	4	intron	Zm00001d024325	Zm00001d024325_T001	0	64669622-64684686	64669622-64684686	976	protein_coding	1	1
10	64684006	64684006	-	64684006	3	3	intron	Zm00001d024325	Zm00001d024325_T001	0	64669622-64684686	64669622-64684686	976	protein_coding	1	1
10	64819276	64819276	-	64819276	5	5	intergenic	Zm00001d024327	Zm00001d024327_T001	263	64819539-64877233	64819539-64877233	403	protein_coding	1	1
10	64819507	64819512	-	64819507	12	22	extended	Zm00001d024327	Zm00001d024327_T001	32	64819539-64877233	64819539-64877233	403	protein_coding	6	3
10	64819537	64819606	-	64819580	121	316	3UTR	Zm00001d024327	Zm00001d024327_T001	0	64819539-64877233	64819539-64877233	403	protein_coding	70	17
10	64819650	64819795	-	64819782	150	471	3UTR	Zm00001d024327	Zm00001d024327_T001	0	64819539-64877233	64819539-64877233	403	protein_coding	146	24
10	64836391	64836391	-	64836391	5	5	intron	Zm00001d024327	Zm00001d024327_T001	0	64819539-64877233	64819539-64877233	403	protein_coding	1	1
10	64861363	64861363	-	64861363	3	3	intron	Zm00001d024327	Zm00001d024327_T001	0	64819539-64877233	64819539-64877233	403	protein_coding	1	1
10	64864778	64864778	-	64864778	3	3	intron	Zm00001d024327	Zm00001d024327_T001	0	64819539-64877233	64819539-64877233	403	protein_coding	1	1
10	65528648	65528648	-	65528648	15	15	3UTR	Zm00001d024339	Zm00001d024339_T001	0	65524284-65532891	65524284-65532891	4775	protein_coding	1	1
10	65528853	65528888	-	65528874	247	360	3UTR	Zm00001d024339	Zm00001d024339_T001	0	65524284-65532891	65524284-65532891	4775	protein_coding	36	10
10	65655572	65655572	-	65655572	4	4	intron	Zm00001d024340	Zm00001d024340_T001	0	65653740-65656426	65653740-65656426	0	protein_coding	1	1
10	65655615	65655615	-	65655615	9	9	intron	Zm00001d024340	Zm00001d024340_T001	0	65653740-65656426	65653740-65656426	0	protein_coding	1	1
10	65655646	65655646	-	65655646	3	3	intron	Zm00001d024340	Zm00001d024340_T001	0	65653740-65656426	65653740-65656426	0	protein_coding	1	1
10	65886699	65886754	-	65886711	17	50	3UTR	Zm00001d024344	Zm00001d024344_T001	0	65886692-65887828	65886692-65887828	192	protein_coding	56	7
10	65970344	65970344	-	65970344	3	3	extended	Zm00001d024347	Zm00001d024347_T001	3	65970347-65974404	65970347-65974404	349	protein_coding	1	1
10	65970373	65970429	-	65970377	127	227	3UTR	Zm00001d024347	Zm00001d024347_T001	0	65970347-65974404	65970347-65974404	349	protein_coding	57	8
10	65970471	65970544	-	65970523	245	593	3UTR	Zm00001d024347	Zm00001d024347_T001	0	65970347-65974404	65970347-65974404	349	protein_coding	74	22
10	65970584	65970584	-	65970584	3	3	3UTR	Zm00001d024347	Zm00001d024347_T001	0	65970347-65974404	65970347-65974404	349	protein_coding	1	1
10	65971293	65971293	-	65971293	4	4	intron	Zm00001d024347	Zm00001d024347_T001	0	65970347-65974404	65970347-65974404	349	protein_coding	1	1
10	65973663	65973663	-	65973663	7	7	intron	Zm00001d024347	Zm00001d024347_T001	0	65970347-65974404	65970347-65974404	349	protein_coding	1	1
10	65979005	65979005	-	65979005	3	3	intergenic	Zm00001d024347	Zm00001d024347_T001	8658	65970347-65974404	65970347-65974404	349	protein_coding	1	1
10	66046738	66046738	-	66046738	4	4	extended	Zm00001d024349	Zm00001d024349_T001	103	66046841-66047920	66046841-66047920	0	protein_coding	1	1
10	66046898	66046898	-	66046898	3	3	CDS	Zm00001d024349	Zm00001d024349_T001	0	66046841-66047920	66046841-66047920	0	protein_coding	1	1
10	66118354	66118426	-	66118404	28	100	extended	Zm00001d024350	Zm00001d024350_T001	88	66118492-66119148	66118492-66119148	63	protein_coding	73	8
10	67166690	67166690	-	67166690	3	3	3UTR	Zm00001d024365	Zm00001d024365_T001	0	67166621-67173531	67166621-67173531	948	protein_coding	1	1
10	67166721	67166721	-	67166721	3	3	3UTR	Zm00001d024365	Zm00001d024365_T001	0	67166621-67173531	67166621-67173531	948	protein_coding	1	1
10	67167326	67167326	-	67167326	3	3	3UTR	Zm00001d024365	Zm00001d024365_T001	0	67166621-67173531	67166621-67173531	948	protein_coding	1	1
10	68164609	68164638	-	68164609	15	30	extended	Zm00001d024379	Zm00001d024379_T001	339	68164948-68165808	68164948-68165808	0	protein_coding	30	4
10	68164687	68164754	-	68164707	76	310	extended	Zm00001d024379	Zm00001d024379_T001	241	68164948-68165808	68164948-68165808	0	protein_coding	68	20
10	68164813	68164813	-	68164813	39	39	extended	Zm00001d024379	Zm00001d024379_T001	135	68164948-68165808	68164948-68165808	0	protein_coding	1	1
10	68193443	68193443	-	68193443	7	7	intergenic	Zm00001d024379	Zm00001d024379_T001	28495	68164948-68165808	68164948-68165808	0	protein_coding	1	1
10	68270879	68270879	-	68270879	6	6	3UTR	Zm00001d024382	Zm00001d024382_T001	0	68270859-68272288	68270859-68272288	385	protein_coding	1	1
10	68270948	68270960	-	68270948	4	8	3UTR	Zm00001d024382	Zm00001d024382_T001	0	68270859-68272288	68270859-68272288	385	protein_coding	13	2
10	68271019	68271019	-	68271019	27	27	3UTR	Zm00001d024382	Zm00001d024382_T001	0	68270859-68272288	68270859-68272288	385	protein_coding	1	1
10	68271044	68271044	-	68271044	3	3	3UTR	Zm00001d024382	Zm00001d024382_T001	0	68270859-68272288	68270859-68272288	385	protein_coding	1	1
10	68271072	68271073	-	68271073	9	17	3UTR	Zm00001d024382	Zm00001d024382_T001	0	68270859-68272288	68270859-68272288	385	protein_coding	2	2
10	68271110	68271110	-	68271110	4	4	3UTR	Zm00001d024382	Zm00001d024382_T001	0	68270859-68272288	68270859-68272288	385	protein_coding	1	1
10	68324450	68324451	-	68324450	12	17	extended	Zm00001d024386	Zm00001d024386_T001	1	68324451-68325959	68324451-68325959	366	protein_coding	2	2
10	68324492	68324492	-	68324492	5	5	3UTR	Zm00001d024386	Zm00001d024386_T001	0	68324451-68325959	68324451-68325959	366	protein_coding	1	1
10	68324518	68324518	-	68324518	3	3	3UTR	Zm00001d024386	Zm00001d024386_T001	0	68324451-68325959	68324451-68325959	366	protein_coding	1	1
10	68324592	68324595	-	68324595	27	31	3UTR	Zm00001d024386	Zm00001d024386_T001	0	68324451-68325959	68324451-68325959	366	protein_coding	4	2
10	68346090	68346090	-	68346090	3	3	intergenic	Zm00001d024388	Zm00001d024388_T001	3891	68342199-68344908	68342199-68344908	0	protein_coding	1	1
10	68369498	68369499	-	68369498	15	19	extended	Zm00001d024389	Zm00001d024389_T001	220	68369718-68370476	68369718-68370476	0	protein_coding	2	2
10	68584670	68584670	-	68584670	3	3	extended	Zm00001d024393	Zm00001d024393_T002	28	68584698-68594748	68584698-68594748	300	protein_coding	1	1
10	68584698	68584715	-	68584698	3	6	3UTR	Zm00001d024393	Zm00001d024393_T002	0	68584698-68594748	68584698-68594748	300	protein_coding	18	2
10	68584742	68584755	-	68584743	4	11	3UTR	Zm00001d024393	Zm00001d024393_T002	0	68584698-68594748	68584698-68594748	300	protein_coding	14	3
10	68584785	68584847	-	68584833	407	1607	3UTR	Zm00001d024393	Zm00001d024393_T002	0	68584698-68594748	68584698-68594748	300	protein_coding	63	22
10	68584881	68584890	-	68584890	7	11	3UTR	Zm00001d024393	Zm00001d024393_T002	0	68584698-68594748	68584698-68594748	300	protein_coding	10	2
10	69004204	69004211	-	69004204	8	12	intergenic	Zm00001d024401	Zm00001d024401_T001	10399	68993805-68994473	68993805-68994473	0	protein_coding	8	2
10	69196117	69196117	-	69196117	3	3	intergenic	Zm00001d024407	Zm00001d024407_T001	122404	69318521-69319274	69318521-69319274	0	protein_coding	1	1
10	69366184	69366184	-	69366184	3	3	intergenic	Zm00001d024408	Zm00001d024408_T002	381	69366565-69372020	69366565-69372020	289	protein_coding	1	1
10	69366237	69366263	-	69366250	28	95	intergenic	Zm00001d024408	Zm00001d024408_T002	315	69366565-69372020	69366565-69372020	289	protein_coding	27	10
10	69366297	69366321	-	69366320	88	147	intergenic	Zm00001d024408	Zm00001d024408_T002	245	69366565-69372020	69366565-69372020	289	protein_coding	25	6
10	69366365	69366466	-	69366458	37	171	extended	Zm00001d024408	Zm00001d024408_T002	107	69366565-69372020	69366565-69372020	289	protein_coding	102	14
10	69366503	69366636	-	69366579	1585	5412	3UTR	Zm00001d024408	Zm00001d024408_T002	0	69366565-69372020	69366565-69372020	289	protein_coding	134	56
10	69366674	69366698	-	69366674	15	22	3UTR	Zm00001d024408	Zm00001d024408_T002	0	69366565-69372020	69366565-69372020	289	protein_coding	25	3
10	69366986	69366986	-	69366986	3	3	intron	Zm00001d024408	Zm00001d024408_T002	0	69366565-69372020	69366565-69372020	289	protein_coding	1	1
10	69367121	69367121	-	69367121	3	3	intron	Zm00001d024408	Zm00001d024408_T002	0	69366565-69372020	69366565-69372020	289	protein_coding	1	1
10	69367587	69367587	-	69367587	3	3	intron	Zm00001d024408	Zm00001d024408_T002	0	69366565-69372020	69366565-69372020	289	protein_coding	1	1
10	69367618	69367618	-	69367618	6	6	intron	Zm00001d024408	Zm00001d024408_T002	0	69366565-69372020	69366565-69372020	289	protein_coding	1	1
10	69367660	69367660	-	69367660	6	6	intron	Zm00001d024408	Zm00001d024408_T002	0	69366565-69372020	69366565-69372020	289	protein_coding	1	1
10	69368669	69368669	-	69368669	5	5	intron	Zm00001d024408	Zm00001d024408_T002	0	69366565-69372020	69366565-69372020	289	protein_coding	1	1
10	69712333	69712333	-	69712333	11	11	extended	Zm00001d024413	Zm00001d024413_T002	134	69712467-69715466	69712467-69715466	1706	protein_coding	1	1
10	69712367	69712367	-	69712367	4	4	extended	Zm00001d024413	Zm00001d024413_T002	100	69712467-69715466	69712467-69715466	1706	protein_coding	1	1
10	69712398	69712402	-	69712398	27	36	extended	Zm00001d024413	Zm00001d024413_T002	69	69712467-69715466	69712467-69715466	1706	protein_coding	5	2
10	69712471	69712620	-	69712500	283	1108	3UTR	Zm00001d024413	Zm00001d024413_T002	0	69712467-69715466	69712467-69715466	1706	protein_coding	150	31
10	69714185	69714185	-	69714185	3	3	3UTR	Zm00001d024413	Zm00001d024413_T002	0	69712467-69715466	69712467-69715466	1706	protein_coding	1	1
10	69714733	69714733	-	69714733	4	4	3UTR	Zm00001d024413	Zm00001d024413_T002	0	69712467-69715466	69712467-69715466	1706	protein_coding	1	1
10	69770562	69770569	-	69770562	3	6	extended	Zm00001d024414	Zm00001d024414_T001	289	69770851-69771330	69770851-69771330	0	protein_coding	8	2
10	69770691	69770724	-	69770714	5	11	extended	Zm00001d024414	Zm00001d024414_T001	137	69770851-69771330	69770851-69771330	0	protein_coding	34	3
10	69936960	69936960	-	69936960	5	5	intergenic	Zm00001d024416	Zm00001d024416_T001	119035	70055995-70057908	70055995-70057908	0	protein_coding	1	1
10	70052624	70052647	-	70052624	10	28	intergenic	Zm00001d024416	Zm00001d024416_T001	3371	70055995-70057908	70055995-70057908	0	protein_coding	24	4
10	70052676	70052689	-	70052684	11	25	intergenic	Zm00001d024416	Zm00001d024416_T001	3311	70055995-70057908	70055995-70057908	0	protein_coding	14	4
10	70052719	70052748	-	70052748	38	70	intergenic	Zm00001d024416	Zm00001d024416_T001	3247	70055995-70057908	70055995-70057908	0	protein_coding	30	4
10	70053601	70053601	-	70053601	4	4	intergenic	Zm00001d024416	Zm00001d024416_T001	2394	70055995-70057908	70055995-70057908	0	protein_coding	1	1
10	70055733	70055788	-	70055742	38	89	extended	Zm00001d024416	Zm00001d024416_T001	253	70055995-70057908	70055995-70057908	0	protein_coding	56	7
10	70055828	70055883	-	70055873	24	101	extended	Zm00001d024416	Zm00001d024416_T001	122	70055995-70057908	70055995-70057908	0	protein_coding	56	12
10	70056009	70056019	-	70056019	5	8	CDS	Zm00001d024416	Zm00001d024416_T001	0	70055995-70057908	70055995-70057908	0	protein_coding	11	2
10	70186181	70186181	-	70186181	71	71	3UTR	Zm00001d024418	Zm00001d024418_T001	0	70186132-70189912	70186132-70189912	492	protein_coding	1	1
10	70186270	70186270	-	70186270	4	4	3UTR	Zm00001d024418	Zm00001d024418_T001	0	70186132-70189912	70186132-70189912	492	protein_coding	1	1
10	70186945	70186945	-	70186945	3	3	intron	Zm00001d024418	Zm00001d024418_T001	0	70186132-70189912	70186132-70189912	492	protein_coding	1	1
10	70189255	70189278	-	70189255	3	6	intron	Zm00001d024418	Zm00001d024418_T001	0	70186132-70189912	70186132-70189912	492	protein_coding	24	2
10	70277488	70277488	-	70277488	26	26	extended	Zm00001d024420	Zm00001d024420_T002	1	70277489-70282890	70277489-70282890	396	protein_coding	1	1
10	70277514	70277605	-	70277556	95	226	3UTR	Zm00001d024420	Zm00001d024420_T002	0	70277489-70282890	70277489-70282890	396	protein_coding	92	12
10	70312679	70312679	-	70312679	4	4	3UTR	Zm00001d024421	Zm00001d024421_T001	0	70312679-70316001	70312679-70316041	356	protein_coding	1	1
10	70312704	70312787	-	70312768	9	49	3UTR	Zm00001d024421	Zm00001d024421_T001	0	70312679-70316001	70312679-70316041	356	protein_coding	84	9
10	70312816	70312816	-	70312816	6	6	3UTR	Zm00001d024421	Zm00001d024421_T001	0	70312679-70316001	70312679-70316041	356	protein_coding	1	1
10	70312849	70312880	-	70312880	41	77	3UTR	Zm00001d024421	Zm00001d024421_T001	0	70312679-70316001	70312679-70316041	356	protein_coding	32	6
10	70312911	70312936	-	70312934	12	27	3UTR	Zm00001d024421	Zm00001d024421_T001	0	70312679-70316001	70312679-70316041	356	protein_coding	26	4
10	70413775	70413775	-	70413775	4	4	intergenic	Zm00001d024424	Zm00001d024424_T001	463	70414238-70420011	70414238-70420011	2652	protein_coding	1	1
10	70413811	70413811	-	70413811	11	11	intergenic	Zm00001d024424	Zm00001d024424_T001	427	70414238-70420011	70414238-70420011	2652	protein_coding	1	1
10	70414708	70414708	-	70414708	4	4	3UTR	Zm00001d024424	Zm00001d024424_T001	0	70414238-70420011	70414238-70420011	2652	protein_coding	1	1
10	70416797	70416797	-	70416797	5	5	3UTR	Zm00001d024424	Zm00001d024424_T001	0	70414238-70420011	70414238-70420011	2652	protein_coding	1	1
10	70416841	70416856	-	70416841	4	7	3UTR	Zm00001d024424	Zm00001d024424_T001	0	70414238-70420011	70414238-70420011	2652	protein_coding	16	2
10	70418771	70418771	-	70418771	3	3	CDS	Zm00001d024424	Zm00001d024424_T001	0	70414238-70420011	70414238-70420011	2652	protein_coding	1	1
10	70577822	70577822	-	70577822	4	4	3UTR	Zm00001d024429	Zm00001d024429_T001	0	70577739-70579793	70577739-70579793	317	protein_coding	1	1
10	70577864	70577887	-	70577874	45	87	3UTR	Zm00001d024429	Zm00001d024429_T001	0	70577739-70579793	70577739-70579793	317	protein_coding	24	5
10	70577917	70577917	-	70577917	7	7	3UTR	Zm00001d024429	Zm00001d024429_T001	0	70577739-70579793	70577739-70579793	317	protein_coding	1	1
10	70581046	70581095	-	70581075	150	311	3UTR	Zm00001d024430	Zm00001d024430_T001	0	70581048-70587117	70581048-70587119	495	protein_coding	50	14
10	70581124	70581175	-	70581157	90	118	3UTR	Zm00001d024430	Zm00001d024430_T001	0	70581048-70587117	70581048-70587119	495	protein_coding	52	5
10	70581338	70581438	-	70581430	26	108	3UTR	Zm00001d024430	Zm00001d024430_T001	0	70581048-70587117	70581048-70587119	495	protein_coding	101	10
10	71764223	71764258	-	71764223	8	21	extended	Zm00001d024460	Zm00001d024460_T001	99	71764322-71764927	71764322-71764927	0	protein_coding	36	4
10	71764324	71764335	-	71764335	5	8	CDS	Zm00001d024460	Zm00001d024460_T001	0	71764322-71764927	71764322-71764927	0	protein_coding	12	2
10	71764387	71764387	-	71764387	3	3	intron	Zm00001d024460	Zm00001d024460_T001	0	71764322-71764927	71764322-71764927	0	protein_coding	1	1
10	71849330	71849330	-	71849330	4	4	intergenic	Zm00001d024460	Zm00001d024460_T001	85008	71764322-71764927	71764322-71764927	0	protein_coding	1	1
10	71956292	71956292	-	71956292	10	10	extended	Zm00001d024463	Zm00001d024463_T010	130	71956422-71966054	71956367-71966054	97	protein_coding	1	1
10	71956409	71956444	-	71956420	86	205	extended	Zm00001d024463	Zm00001d024463_T010	2	71956422-71966054	71956367-71966054	97	protein_coding	36	14
10	71956486	71956486	-	71956486	4	4	3UTR	Zm00001d024463	Zm00001d024463_T010	0	71956422-71966054	71956367-71966054	97	protein_coding	1	1
10	71956658	71956658	-	71956658	4	4	CDS	Zm00001d024463	Zm00001d024463_T010	0	71956422-71966054	71956367-71966054	97	protein_coding	1	1
10	71958630	71958630	-	71958630	3	3	CDS	Zm00001d024463	Zm00001d024463_T010	0	71956422-71966054	71956367-71966054	97	protein_coding	1	1
10	72127062	72127062	-	72127062	4	4	intergenic	Zm00001d024465	Zm00001d024465_T001	712	72127774-72128574	72127774-72128574	0	protein_coding	1	1
10	72127148	72127148	-	72127148	4	4	intergenic	Zm00001d024465	Zm00001d024465_T001	626	72127774-72128574	72127774-72128574	0	protein_coding	1	1
10	72127187	72127187	-	72127187	3	3	intergenic	Zm00001d024465	Zm00001d024465_T001	587	72127774-72128574	72127774-72128574	0	protein_coding	1	1
10	72128869	72128869	-	72128869	7	7	intergenic	Zm00001d024466	Zm00001d024466_T001	491	72129360-72135148	72129360-72135148	275	protein_coding	1	1
10	72129256	72129377	-	72129314	17	65	extended	Zm00001d024466	Zm00001d024466_T001	46	72129360-72135148	72129360-72135148	275	protein_coding	122	9
10	72129455	72129552	-	72129513	123	360	3UTR	Zm00001d024466	Zm00001d024466_T001	0	72129360-72135148	72129360-72135148	275	protein_coding	98	21
10	72132553	72132553	-	72132553	3	3	intron	Zm00001d024466	Zm00001d024466_T001	0	72129360-72135148	72129360-72135148	275	protein_coding	1	1
10	72229162	72229170	-	72229162	6	9	extended	Zm00001d024468	Zm00001d024468_T001	73	72229235-72232453	72229235-72232453	173	protein_coding	9	2
10	72229199	72229280	-	72229235	69	250	3UTR	Zm00001d024468	Zm00001d024468_T001	0	72229235-72232453	72229235-72232453	173	protein_coding	82	14
10	72229356	72229356	-	72229356	3	3	3UTR	Zm00001d024468	Zm00001d024468_T001	0	72229235-72232453	72229235-72232453	173	protein_coding	1	1
10	72345149	72345149	-	72345149	4	4	extended	Zm00001d024470	Zm00001d024470_T002	67	72345216-72358785	72345216-72358785	259	protein_coding	1	1
10	72345203	72345356	-	72345248	200	656	3UTR	Zm00001d024470	Zm00001d024470_T002	0	72345216-72358785	72345216-72358785	259	protein_coding	154	31
10	72358677	72358677	-	72358677	3	3	5UTR	Zm00001d024470	Zm00001d024470_T002	0	72345216-72358785	72345216-72358785	259	protein_coding	1	1
10	72680521	72680521	-	72680521	3	3	intergenic	Zm00001d024474	Zm00001d024474_T001	105389	72575132-72577927	72575132-72577927	107	protein_coding	1	1
10	73562312	73562312	-	73562312	6	6	intergenic	Zm00001d024481	Zm00001d024481_T002	119852	73442460-73446118	73442460-73446118	331	protein_coding	1	1
10	73839476	73839476	-	73839476	3	3	3UTR	Zm00001d024488	Zm00001d024488_T001	0	73839384-73843136	73839384-73843136	220	protein_coding	1	1
10	74141437	74141437	-	74141437	4	4	extended	Zm00001d024494	Zm00001d024494_T001	305	74141742-74142257	74141742-74142257	0	protein_coding	1	1
10	74141466	74141480	-	74141480	14	21	extended	Zm00001d024494	Zm00001d024494_T001	262	74141742-74142257	74141742-74142257	0	protein_coding	15	2
10	74141528	74141578	-	74141542	67	154	extended	Zm00001d024494	Zm00001d024494_T001	200	74141742-74142257	74141742-74142257	0	protein_coding	51	9
10	74154447	74154448	-	74154447	5	8	3UTR	Zm00001d024497	Zm00001d024497_T001	0	74153903-74159100	74153903-74159100	666	protein_coding	2	2
10	74393962	74394005	-	74393983	6	20	extended	Zm00001d024499	Zm00001d024499_T001	45	74394028-74403109	74394028-74403109	116	protein_coding	44	4
10	74394032	74394032	-	74394032	4	4	3UTR	Zm00001d024499	Zm00001d024499_T001	0	74394028-74403109	74394028-74403109	116	protein_coding	1	1
10	74399081	74399081	-	74399081	3	3	intron	Zm00001d024499	Zm00001d024499_T001	0	74394028-74403109	74394028-74403109	116	protein_coding	1	1
10	74402560	74402568	-	74402560	4	8	intron	Zm00001d024499	Zm00001d024499_T001	0	74394028-74403109	74394028-74403109	116	protein_coding	9	2
10	74832693	74832693	-	74832693	4	4	3UTR	Zm00001d024507	Zm00001d024507_T001	0	74832693-74836584	74832693-74836584	367	protein_coding	1	1
10	74930282	74930315	-	74930314	107	313	3UTR	Zm00001d024510	Zm00001d024510_T002	0	74930192-74935116	74930192-74935116	376	protein_coding	34	15
10	74930361	74930367	-	74930361	4	7	3UTR	Zm00001d024510	Zm00001d024510_T002	0	74930192-74935116	74930192-74935116	376	protein_coding	7	2
10	74930396	74930485	-	74930396	20	129	3UTR	Zm00001d024510	Zm00001d024510_T002	0	74930192-74935116	74930192-74935116	376	protein_coding	90	13
10	74958069	74958069	-	74958069	3	3	intergenic	Zm00001d024510	Zm00001d024510_T002	27877	74930192-74935116	74930192-74935116	376	protein_coding	1	1
10	75069714	75069714	-	75069714	4	4	3UTR	Zm00001d024512	Zm00001d024512_T004	0	75069687-75075183	75069687-75075183	127	protein_coding	1	1
10	75069747	75069768	-	75069747	6	16	3UTR	Zm00001d024512	Zm00001d024512_T004	0	75069687-75075183	75069687-75075183	127	protein_coding	22	4
10	75522467	75522467	-	75522467	3	3	intergenic	Zm00001d024515	Zm00001d024515_T001	9045	75531512-75533071	75531512-75533071	0	protein_coding	1	1
10	75581055	75581058	-	75581055	15	19	3UTR	Zm00001d024516	Zm00001d024516_T001	0	75580964-75584778	75580964-75584778	584	protein_coding	4	2
10	75581084	75581116	-	75581097	48	196	3UTR	Zm00001d024516	Zm00001d024516_T001	0	75580964-75584778	75580964-75584778	584	protein_coding	33	12
10	75581284	75581343	-	75581307	53	108	3UTR	Zm00001d024516	Zm00001d024516_T001	0	75580964-75584778	75580964-75584778	584	protein_coding	60	9
10	75764365	75764398	-	75764388	150	164	3UTR	Zm00001d024519	Zm00001d024519_T002	0	75764386-75780299	75764386-75780299	2749	protein_coding	34	4
10	75767240	75767334	-	75767281	266	1130	3UTR	Zm00001d024519	Zm00001d024519_T002	0	75764386-75780299	75764386-75780299	2749	protein_coding	95	26
10	75776844	75776844	-	75776844	3	3	intron	Zm00001d024519	Zm00001d024519_T002	0	75764386-75780299	75764386-75780299	2749	protein_coding	1	1
10	75861894	75861894	-	75861894	4	4	intergenic	Zm00001d024521	Zm00001d024521_T001	3000	75864894-75867823	75864894-75867823	744	protein_coding	1	1
10	75865565	75865565	-	75865565	3	3	intron	Zm00001d024521	Zm00001d024521_T001	0	75864894-75867823	75864894-75867823	744	protein_coding	1	1
10	75865620	75865691	-	75865645	24	52	3UTR	Zm00001d024521	Zm00001d024521_T001	0	75864894-75867823	75864894-75867823	744	protein_coding	72	7
10	75865743	75865748	-	75865748	4	7	3UTR	Zm00001d024521	Zm00001d024521_T001	0	75864894-75867823	75864894-75867823	744	protein_coding	6	2
10	75867276	75867276	-	75867276	4	4	intron	Zm00001d024521	Zm00001d024521_T001	0	75864894-75867823	75864894-75867823	744	protein_coding	1	1
10	75867325	75867325	-	75867325	3	3	intron	Zm00001d024521	Zm00001d024521_T001	0	75864894-75867823	75864894-75867823	744	protein_coding	1	1
10	75992668	75992668	-	75992668	5	5	intergenic	Zm00001d024523	Zm00001d024523_T003	1160	75993828-76002912	75993828-76002912	560	protein_coding	1	1
10	75993822	75993852	-	75993827	18	47	extended	Zm00001d024523	Zm00001d024523_T003	1	75993828-76002912	75993828-76002912	560	protein_coding	31	4
10	75993879	75994020	-	75993920	104	425	3UTR	Zm00001d024523	Zm00001d024523_T003	0	75993828-76002912	75993828-76002912	560	protein_coding	142	28
10	75994057	75994069	-	75994057	9	14	3UTR	Zm00001d024523	Zm00001d024523_T003	0	75993828-76002912	75993828-76002912	560	protein_coding	13	2
10	75994120	75994123	-	75994123	12	19	3UTR	Zm00001d024523	Zm00001d024523_T003	0	75993828-76002912	75993828-76002912	560	protein_coding	4	2
10	75994176	75994188	-	75994187	17	28	3UTR	Zm00001d024523	Zm00001d024523_T003	0	75993828-76002912	75993828-76002912	560	protein_coding	13	3
10	76302293	76302380	-	76302345	252	754	3UTR	Zm00001d024525	Zm00001d024525_T002	0	76302295-76309059	76302295-76309059	337	protein_coding	88	29
10	76302452	76302452	-	76302452	4	4	3UTR	Zm00001d024525	Zm00001d024525_T002	0	76302295-76309059	76302295-76309059	337	protein_coding	1	1
10	76302501	76302501	-	76302501	25	25	3UTR	Zm00001d024525	Zm00001d024525_T002	0	76302295-76309059	76302295-76309059	337	protein_coding	1	1
10	76303666	76303666	-	76303666	3	3	CDS	Zm00001d024525	Zm00001d024525_T002	0	76302295-76309059	76302295-76309059	337	protein_coding	1	1
10	76461515	76461515	-	76461515	3	3	intergenic	Zm00001d024525	Zm00001d024525_T002	159220	76302295-76309059	76302295-76309059	337	protein_coding	1	1
10	76469878	76469878	-	76469878	4	4	intergenic	Zm00001d024525	Zm00001d024525_T002	167583	76302295-76309059	76302295-76309059	337	protein_coding	1	1
10	76469903	76469908	-	76469908	26	31	intergenic	Zm00001d024525	Zm00001d024525_T002	167613	76302295-76309059	76302295-76309059	337	protein_coding	6	2
10	76470046	76470046	-	76470046	15	15	intergenic	Zm00001d024525	Zm00001d024525_T002	167751	76302295-76309059	76302295-76309059	337	protein_coding	1	1
10	76471618	76471618	-	76471618	4	4	intergenic	Zm00001d024525	Zm00001d024525_T002	169323	76302295-76309059	76302295-76309059	337	protein_coding	1	1
10	76471672	76471675	-	76471675	12	16	intergenic	Zm00001d024525	Zm00001d024525_T002	169380	76302295-76309059	76302295-76309059	337	protein_coding	4	2
10	76471700	76471700	-	76471700	3	3	intergenic	Zm00001d024525	Zm00001d024525_T002	169405	76302295-76309059	76302295-76309059	337	protein_coding	1	1
10	77074344	77074345	-	77074344	5	8	intergenic	Zm00001d024538	Zm00001d024538_T001	4044	77078388-77079341	77078388-77079341	0	protein_coding	2	2
10	77074387	77074485	-	77074443	323	529	intergenic	Zm00001d024538	Zm00001d024538_T001	3945	77078388-77079341	77078388-77079341	0	protein_coding	99	16
10	77078096	77078096	-	77078096	13	13	extended	Zm00001d024538	Zm00001d024538_T001	292	77078388-77079341	77078388-77079341	0	protein_coding	1	1
10	77078241	77078241	-	77078241	4	4	extended	Zm00001d024538	Zm00001d024538_T001	147	77078388-77079341	77078388-77079341	0	protein_coding	1	1
10	77080371	77080371	-	77080371	4	4	intergenic	Zm00001d024538	Zm00001d024538_T001	1983	77078388-77079341	77078388-77079341	0	protein_coding	1	1
10	77144161	77144332	-	77144222	197	1254	3UTR	Zm00001d024540	Zm00001d024540_T001	0	77144191-77149860	77144191-77149860	324	protein_coding	172	42
10	77547267	77547267	-	77547267	3	3	extended	Zm00001d024545	Zm00001d024545_T001	230	77547497-77548246	77547497-77548246	0	protein_coding	1	1
10	77562976	77562976	-	77562976	3	3	intergenic	Zm00001d024545	Zm00001d024545_T001	15479	77547497-77548246	77547497-77548246	0	protein_coding	1	1
10	77698624	77698624	-	77698624	7	7	intergenic	Zm00001d024546	Zm00001d024546_T001	1514	77700138-77703390	77700138-77703390	263	protein_coding	1	1
10	77699899	77699899	-	77699899	3	3	intergenic	Zm00001d024546	Zm00001d024546_T001	239	77700138-77703390	77700138-77703390	263	protein_coding	1	1
10	77700036	77700036	-	77700036	4	4	extended	Zm00001d024546	Zm00001d024546_T001	102	77700138-77703390	77700138-77703390	263	protein_coding	1	1
10	77700131	77700178	-	77700138	55	115	3UTR	Zm00001d024546	Zm00001d024546_T001	0	77700138-77703390	77700138-77703390	263	protein_coding	48	11
10	77700214	77700229	-	77700221	15	50	3UTR	Zm00001d024546	Zm00001d024546_T001	0	77700138-77703390	77700138-77703390	263	protein_coding	16	6
10	77700262	77700284	-	77700284	26	36	3UTR	Zm00001d024546	Zm00001d024546_T001	0	77700138-77703390	77700138-77703390	263	protein_coding	23	3
10	77767602	77767746	-	77767732	133	712	intergenic	Zm00001d024548	Zm00001d024548_T001	4465	77772197-77772878	77772197-77772878	202	protein_coding	145	32
10	77772165	77772330	-	77772301	1565	3479	3UTR	Zm00001d024548	Zm00001d024548_T001	0	77772197-77772878	77772197-77772878	202	protein_coding	166	39
10	77775724	77775724	-	77775724	4	4	intergenic	Zm00001d024549	Zm00001d024549_T001	1364	77777088-77777751	77777088-77777751	195	protein_coding	1	1
10	78547318	78547320	-	78547318	5	8	3UTR	Zm00001d024568	Zm00001d024568_T001	0	78544726-78549479	78544726-78549479	2829	protein_coding	3	2
10	78547356	78547356	-	78547356	3	3	3UTR	Zm00001d024568	Zm00001d024568_T001	0	78544726-78549479	78544726-78549479	2829	protein_coding	1	1
10	78547493	78547493	-	78547493	5	5	3UTR	Zm00001d024568	Zm00001d024568_T001	0	78544726-78549479	78544726-78549479	2829	protein_coding	1	1
10	78696445	78696445	-	78696445	5	5	extended	Zm00001d024571	Zm00001d024571_T001	57	78696502-78699043	78696502-78699043	276	protein_coding	1	1
10	78696506	78696506	-	78696506	4	4	3UTR	Zm00001d024571	Zm00001d024571_T001	0	78696502-78699043	78696502-78699043	276	protein_coding	1	1
10	78696534	78696702	-	78696624	1598	6371	3UTR	Zm00001d024571	Zm00001d024571_T001	0	78696502-78699043	78696502-78699043	276	protein_coding	169	78
10	78696727	78696727	-	78696727	4	4	3UTR	Zm00001d024571	Zm00001d024571_T001	0	78696502-78699043	78696502-78699043	276	protein_coding	1	1
10	78697412	78697412	-	78697412	3	3	intron	Zm00001d024571	Zm00001d024571_T001	0	78696502-78699043	78696502-78699043	276	protein_coding	1	1
10	78697664	78697664	-	78697664	3	3	intron	Zm00001d024571	Zm00001d024571_T001	0	78696502-78699043	78696502-78699043	276	protein_coding	1	1
10	78698467	78698467	-	78698467	5	5	intron	Zm00001d024571	Zm00001d024571_T001	0	78696502-78699043	78696502-78699043	276	protein_coding	1	1
10	78703930	78703970	-	78703954	98	170	3UTR	Zm00001d024572	Zm00001d024572_T002	0	78703945-78707136	78703892-78707138	351	protein_coding	41	9
10	78798577	78798730	-	78798727	556	1658	extended	Zm00001d024573	Zm00001d024573_T001	157	78798884-78799324	78798884-78799324	0	protein_coding	154	37
10	78798808	78798811	-	78798811	4	7	extended	Zm00001d024573	Zm00001d024573_T001	73	78798884-78799324	78798884-78799324	0	protein_coding	4	2
10	78836179	78836179	-	78836179	4	4	extended	Zm00001d024574	Zm00001d024574_T001	189	78836368-78838011	78836368-78838011	0	protein_coding	1	1
10	78836207	78836231	-	78836210	15	47	extended	Zm00001d024574	Zm00001d024574_T001	158	78836368-78838011	78836368-78838011	0	protein_coding	25	4
10	78836261	78836283	-	78836261	5	9	extended	Zm00001d024574	Zm00001d024574_T001	107	78836368-78838011	78836368-78838011	0	protein_coding	23	2
10	78873658	78873658	-	78873658	3	3	intergenic	Zm00001d024575	Zm00001d024575_T001	33993	78839665-78843440	78839665-78843440	463	protein_coding	1	1
10	79474689	79474800	-	79474754	52	453	3UTR	Zm00001d024588	Zm00001d024588_T001	0	79474689-79478403	79474689-79478403	309	protein_coding	112	35
10	79578403	79578476	-	79578476	66	187	3UTR	Zm00001d024591	Zm00001d024591_T001	0	79578452-79580065	79578452-79580065	492	protein_coding	74	10
10	79578507	79578508	-	79578507	66	69	3UTR	Zm00001d024591	Zm00001d024591_T001	0	79578452-79580065	79578452-79580065	492	protein_coding	2	2
10	79578548	79578584	-	79578567	159	301	3UTR	Zm00001d024591	Zm00001d024591_T001	0	79578452-79580065	79578452-79580065	492	protein_coding	37	12
10	79578791	79578819	-	79578816	126	291	3UTR	Zm00001d024591	Zm00001d024591_T001	0	79578452-79580065	79578452-79580065	492	protein_coding	29	12
10	79588483	79588483	-	79588483	3	3	extended	Zm00001d024593	Zm00001d024593_T001	125	79588608-79589422	79588608-79589422	0	protein_coding	1	1
10	79588523	79588540	-	79588540	5	9	extended	Zm00001d024593	Zm00001d024593_T001	68	79588608-79589422	79588608-79589422	0	protein_coding	18	2
10	79831063	79831124	-	79831119	10	40	3UTR	Zm00001d024596	Zm00001d024596_T002	0	79830935-79836122	79830935-79838588	310	protein_coding	62	6
10	79831157	79831203	-	79831175	11	40	3UTR	Zm00001d024596	Zm00001d024596_T002	0	79830935-79836122	79830935-79838588	310	protein_coding	47	7
10	79908854	79908854	-	79908854	3	3	extended	Zm00001d024598	Zm00001d024598_T001	82	79908936-79913706	79908936-79913706	392	protein_coding	1	1
10	79908908	79908986	-	79908958	278	1328	3UTR	Zm00001d024598	Zm00001d024598_T001	0	79908936-79913706	79908936-79913706	392	protein_coding	79	25
10	79909011	79909110	-	79909044	60	189	3UTR	Zm00001d024598	Zm00001d024598_T001	0	79908936-79913706	79908936-79913706	392	protein_coding	100	13
10	79909207	79909243	-	79909208	21	66	3UTR	Zm00001d024598	Zm00001d024598_T001	0	79908936-79913706	79908936-79913706	392	protein_coding	37	10
10	79909287	79909287	-	79909287	10	10	3UTR	Zm00001d024598	Zm00001d024598_T001	0	79908936-79913706	79908936-79913706	392	protein_coding	1	1
10	79909341	79909356	-	79909341	4	11	intron	Zm00001d024598	Zm00001d024598_T001	0	79908936-79913706	79908936-79913706	392	protein_coding	16	3
10	79910465	79910465	-	79910465	7	7	intron	Zm00001d024598	Zm00001d024598_T001	0	79908936-79913706	79908936-79913706	392	protein_coding	1	1
10	79910905	79910905	-	79910905	3	3	CDS	Zm00001d024598	Zm00001d024598_T001	0	79908936-79913706	79908936-79913706	392	protein_coding	1	1
10	80554201	80554206	-	80554201	17	21	intron	Zm00001d024620	Zm00001d024620_T001	0	80551131-80554704	80551131-80554704	157	protein_coding	6	2
10	81355516	81355516	-	81355516	3	3	extended	Zm00001d024635	Zm00001d024635_T001	3	81355519-81359449	81355519-81359449	446	protein_coding	1	1
10	81355762	81355772	-	81355768	17	29	3UTR	Zm00001d024635	Zm00001d024635_T001	0	81355519-81359449	81355519-81359449	446	protein_coding	11	3
10	81355810	81355810	-	81355810	4	4	3UTR	Zm00001d024635	Zm00001d024635_T001	0	81355519-81359449	81355519-81359449	446	protein_coding	1	1
10	81358972	81358972	-	81358972	3	3	intron	Zm00001d024635	Zm00001d024635_T001	0	81355519-81359449	81355519-81359449	446	protein_coding	1	1
10	81908056	81908056	-	81908056	5	5	intergenic	Zm00001d024644	Zm00001d024644_T001	1866	81909922-81912952	81909922-81912952	193	protein_coding	1	1
10	81909617	81909617	-	81909617	3	3	intergenic	Zm00001d024644	Zm00001d024644_T001	305	81909922-81912952	81909922-81912952	193	protein_coding	1	1
10	81909834	81909848	-	81909848	6	11	extended	Zm00001d024644	Zm00001d024644_T001	74	81909922-81912952	81909922-81912952	193	protein_coding	15	2
10	81909902	81910035	-	81909926	152	377	3UTR	Zm00001d024644	Zm00001d024644_T001	0	81909922-81912952	81909922-81912952	193	protein_coding	134	18
10	82010523	82010523	-	82010523	3	3	extended	Zm00001d024646	Zm00001d024646_T001	101	82010624-82014234	82010624-82014234	103	protein_coding	1	1
10	82010582	82010649	-	82010632	77	243	3UTR	Zm00001d024646	Zm00001d024646_T001	0	82010624-82014234	82010624-82014234	103	protein_coding	68	16
10	82010682	82010682	-	82010682	5	5	3UTR	Zm00001d024646	Zm00001d024646_T001	0	82010624-82014234	82010624-82014234	103	protein_coding	1	1
10	82012855	82012855	-	82012855	3	3	intron	Zm00001d024646	Zm00001d024646_T001	0	82010624-82014234	82010624-82014234	103	protein_coding	1	1
10	82133035	82133035	-	82133035	3	3	intron	Zm00001d024651	Zm00001d024651_T001	0	82129612-82135240	82129612-82135240	0	protein_coding	1	1
10	82482089	82482089	-	82482089	3	3	3UTR	Zm00001d024659	Zm00001d024659_T001	0	82482086-82482747	82482086-82482747	141	protein_coding	1	1
10	82539320	82539320	-	82539320	5	5	intergenic	Zm00001d024661	Zm00001d024661_T001	705	82540025-82546173	82540025-82546173	349	protein_coding	1	1
10	82539959	82539967	-	82539959	3	6	extended	Zm00001d024661	Zm00001d024661_T001	66	82540025-82546173	82540025-82546173	349	protein_coding	9	2
10	82540026	82540125	-	82540075	55	296	3UTR	Zm00001d024661	Zm00001d024661_T001	0	82540025-82546173	82540025-82546173	349	protein_coding	100	17
10	82540157	82540157	-	82540157	5	5	3UTR	Zm00001d024661	Zm00001d024661_T001	0	82540025-82546173	82540025-82546173	349	protein_coding	1	1
10	82540192	82540200	-	82540200	58	87	3UTR	Zm00001d024661	Zm00001d024661_T001	0	82540025-82546173	82540025-82546173	349	protein_coding	9	4
10	83032421	83032547	-	83032523	124	469	3UTR	Zm00001d024671	Zm00001d024671_T001	0	83032420-83036654	83032420-83036654	312	protein_coding	127	20
10	83032572	83032572	-	83032572	15	15	3UTR	Zm00001d024671	Zm00001d024671_T001	0	83032420-83036654	83032420-83036654	312	protein_coding	1	1
10	83032619	83032661	-	83032661	4	13	3UTR	Zm00001d024671	Zm00001d024671_T001	0	83032420-83036654	83032420-83036654	312	protein_coding	43	4
10	83034876	83034893	-	83034876	3	6	intron	Zm00001d024671	Zm00001d024671_T001	0	83032420-83036654	83032420-83036654	312	protein_coding	18	2
10	83503892	83503892	-	83503892	4	4	extended	Zm00001d024680	Zm00001d024680_T001	248	83504140-83504892	83504140-83504892	0	protein_coding	1	1
10	83503976	83503991	-	83503976	3	6	extended	Zm00001d024680	Zm00001d024680_T001	164	83504140-83504892	83504140-83504892	0	protein_coding	16	2
10	83536453	83536507	-	83536488	10	42	intergenic	Zm00001d024680	Zm00001d024680_T001	32348	83504140-83504892	83504140-83504892	0	protein_coding	55	7
10	83684944	83684946	-	83684944	4	10	extended	Zm00001d024690	Zm00001d024690_T001	15	83684959-83685031	83684959-83685031	0	tRNA	3	3
10	83884630	83884631	-	83884630	9	13	intergenic	Zm00001d024693	Zm00001d024693_T001	1788	83886418-83901602	83886418-83901602	0	protein_coding	2	2
10	83887783	83887783	-	83887783	3	3	CDS	Zm00001d024693	Zm00001d024693_T001	0	83886418-83901602	83886418-83901602	0	protein_coding	1	1
10	83961956	83961966	-	83961966	9	17	extended	Zm00001d024698	Zm00001d024698_T001	39	83962005-83966353	83962005-83966353	180	protein_coding	11	2
10	83962006	83962037	-	83962008	223	355	3UTR	Zm00001d024698	Zm00001d024698_T001	0	83962005-83966353	83962005-83966353	180	protein_coding	32	8
10	83962265	83962327	-	83962297	73	173	intron	Zm00001d024698	Zm00001d024698_T001	0	83962005-83966353	83962005-83966353	180	protein_coding	63	11
10	84130274	84130296	-	84130291	294	457	extended	Zm00001d024702	Zm00001d024702_T001	15	84130306-84133108	84130306-84133108	203	protein_coding	23	8
10	84130391	84130391	-	84130391	6	6	3UTR	Zm00001d024702	Zm00001d024702_T001	0	84130306-84133108	84130306-84133108	203	protein_coding	1	1
10	84135226	84135226	-	84135226	4	4	3UTR	Zm00001d024703	Zm00001d024703_T004	0	84135184-84142738	84135184-84142738	520	protein_coding	1	1
10	84135278	84135343	-	84135278	36	104	3UTR	Zm00001d024703	Zm00001d024703_T004	0	84135184-84142738	84135184-84142738	520	protein_coding	66	11
10	84135372	84135467	-	84135450	61	233	3UTR	Zm00001d024703	Zm00001d024703_T004	0	84135184-84142738	84135184-84142738	520	protein_coding	96	19
10	84137755	84137765	-	84137755	4	11	CDS	Zm00001d024703	Zm00001d024703_T004	0	84135184-84142738	84135184-84142738	520	protein_coding	11	3
10	84140349	84140349	-	84140349	3	3	5UTR	Zm00001d024703	Zm00001d024703_T004	0	84135184-84142738	84135184-84142738	520	protein_coding	1	1
10	84140418	84140418	-	84140418	3	3	5UTR	Zm00001d024703	Zm00001d024703_T004	0	84135184-84142738	84135184-84142738	520	protein_coding	1	1
10	84140619	84140672	-	84140639	92	201	5UTR	Zm00001d024703	Zm00001d024703_T004	0	84135184-84142738	84135184-84142738	520	protein_coding	54	9
10	84141540	84141556	-	84141540	3	6	intron	Zm00001d024703	Zm00001d024703_T004	0	84135184-84142738	84135184-84142738	520	protein_coding	17	2
10	84181769	84181770	-	84181770	5	9	intergenic	Zm00001d024704	Zm00001d024704_T004	16730	84198500-84212285	84198500-84212285	371	protein_coding	2	2
10	84198521	84198521	-	84198521	3	3	3UTR	Zm00001d024704	Zm00001d024704_T004	0	84198500-84212285	84198500-84212285	371	protein_coding	1	1
10	84198581	84198581	-	84198581	3	3	3UTR	Zm00001d024704	Zm00001d024704_T004	0	84198500-84212285	84198500-84212285	371	protein_coding	1	1
10	84198643	84198679	-	84198643	27	97	3UTR	Zm00001d024704	Zm00001d024704_T004	0	84198500-84212285	84198500-84212285	371	protein_coding	37	5
10	84206436	84206451	-	84206436	5	9	intron	Zm00001d024704	Zm00001d024704_T004	0	84198500-84212285	84198500-84212285	371	protein_coding	16	2
10	84210291	84210308	-	84210291	4	8	intron	Zm00001d024704	Zm00001d024704_T004	0	84198500-84212285	84198500-84212285	371	protein_coding	18	2
10	84436876	84436876	-	84436876	3	3	intergenic	Zm00001d024707	Zm00001d024707_T001	56265	84380611-84382783	84380611-84382783	0	protein_coding	1	1
10	84554485	84554491	-	84554491	20	24	3UTR	Zm00001d024712	Zm00001d024712_T001	0	84554486-84559629	84554486-84559654	164	protein_coding	7	2
10	84554517	84554517	-	84554517	8	8	3UTR	Zm00001d024712	Zm00001d024712_T001	0	84554486-84559629	84554486-84559654	164	protein_coding	1	1
10	84557093	84557093	-	84557093	3	3	intron	Zm00001d024712	Zm00001d024712_T001	0	84554486-84559629	84554486-84559654	164	protein_coding	1	1
10	84560070	84560070	-	84560070	7	7	3UTR	Zm00001d024713	Zm00001d024713_T006	0	84560055-84568649	84560055-84568649	1491	protein_coding	1	1
10	84701493	84701539	-	84701515	7	19	3UTR	Zm00001d024715	Zm00001d024715_T001	0	84701374-84706220	84701374-84706220	401	protein_coding	47	4
10	84704173	84704173	-	84704173	4	4	CDS	Zm00001d024715	Zm00001d024715_T001	0	84701374-84706220	84701374-84706220	401	protein_coding	1	1
10	84950222	84950222	-	84950222	3	3	extended	Zm00001d024718	Zm00001d024718_T001	27	84950249-84953020	84950249-84953025	294	protein_coding	1	1
10	84950258	84950258	-	84950258	6	6	3UTR	Zm00001d024718	Zm00001d024718_T001	0	84950249-84953020	84950249-84953025	294	protein_coding	1	1
10	84950294	84950319	-	84950296	102	270	3UTR	Zm00001d024718	Zm00001d024718_T001	0	84950249-84953020	84950249-84953025	294	protein_coding	26	8
10	84950352	84950383	-	84950359	22	65	3UTR	Zm00001d024718	Zm00001d024718_T001	0	84950249-84953020	84950249-84953025	294	protein_coding	32	4
10	85127995	85128006	-	85127995	4	7	extended	Zm00001d024723	Zm00001d024723_T002	128	85128123-85133157	85128123-85133157	158	protein_coding	12	2
10	85128057	85128082	-	85128057	4	10	extended	Zm00001d024723	Zm00001d024723_T002	66	85128123-85133157	85128123-85133157	158	protein_coding	26	3
10	85128132	85128168	-	85128158	78	216	3UTR	Zm00001d024723	Zm00001d024723_T002	0	85128123-85133157	85128123-85133157	158	protein_coding	37	10
10	85200518	85200518	-	85200518	3	3	intergenic	Zm00001d024723	Zm00001d024723_T002	72395	85128123-85133157	85128123-85133157	158	protein_coding	1	1
10	85359925	85359925	-	85359925	3	3	extended	Zm00001d024726	Zm00001d024726_T001	299	85360224-85361291	85360224-85361291	0	protein_coding	1	1
10	85508316	85508316	-	85508316	3	3	3UTR	Zm00001d024729	Zm00001d024729_T001	0	85508260-85512046	85508260-85512046	455	protein_coding	1	1
10	85508357	85508380	-	85508359	48	102	3UTR	Zm00001d024729	Zm00001d024729_T001	0	85508260-85512046	85508260-85512046	455	protein_coding	24	9
10	85593139	85593168	-	85593139	19	30	intron	Zm00001d024733	Zm00001d024733_T002	0	85592812-85596617	85592812-85596617	1496	protein_coding	30	3
10	85593201	85593209	-	85593201	19	34	intron	Zm00001d024733	Zm00001d024733_T002	0	85592812-85596617	85592812-85596617	1496	protein_coding	9	2
10	85593266	85593266	-	85593266	5	5	intron	Zm00001d024733	Zm00001d024733_T002	0	85592812-85596617	85592812-85596617	1496	protein_coding	1	1
10	85593331	85593331	-	85593331	4	4	3UTR	Zm00001d024733	Zm00001d024733_T002	0	85592812-85596617	85592812-85596617	1496	protein_coding	1	1
10	85593431	85593431	-	85593431	3	3	3UTR	Zm00001d024733	Zm00001d024733_T002	0	85592812-85596617	85592812-85596617	1496	protein_coding	1	1
10	85796018	85796018	-	85796018	4	4	intergenic	Zm00001d024741	Zm00001d024741_T001	1162	85797180-85797602	85797180-85797602	0	protein_coding	1	1
10	86469169	86469202	-	86469187	13	60	extended	Zm00001d024756	Zm00001d024756_T004	3	86469190-86473935	86469146-86473935	338	protein_coding	34	8
10	86469229	86469251	-	86469242	6	16	3UTR	Zm00001d024756	Zm00001d024756_T004	0	86469190-86473935	86469146-86473935	338	protein_coding	23	4
10	86469282	86469282	-	86469282	3	3	3UTR	Zm00001d024756	Zm00001d024756_T004	0	86469190-86473935	86469146-86473935	338	protein_coding	1	1
10	86471471	86471471	-	86471471	3	3	intron	Zm00001d024756	Zm00001d024756_T004	0	86469190-86473935	86469146-86473935	338	protein_coding	1	1
10	86563210	86563213	-	86563210	6	15	extended	Zm00001d024759	Zm00001d024759_T001	103	86563313-86576507	86563313-86576507	244	protein_coding	4	3
10	86563247	86563428	-	86563337	67	313	3UTR	Zm00001d024759	Zm00001d024759_T001	0	86563313-86576507	86563313-86576507	244	protein_coding	182	23
10	86563454	86563463	-	86563454	5	10	3UTR	Zm00001d024759	Zm00001d024759_T001	0	86563313-86576507	86563313-86576507	244	protein_coding	10	2
10	86732521	86732522	-	86732521	5	8	extended	Zm00001d024762	Zm00001d024762_T001	46	86732567-86742134	86732567-86742134	288	protein_coding	2	2
10	86732599	86732634	-	86732611	139	204	3UTR	Zm00001d024762	Zm00001d024762_T001	0	86732567-86742134	86732567-86742134	288	protein_coding	36	8
10	87223189	87223189	-	87223189	4	4	extended	Zm00001d024768	Zm00001d024768_T001	206	87223395-87228172	87223395-87228172	0	protein_coding	1	1
10	87223214	87223242	-	87223219	145	295	extended	Zm00001d024768	Zm00001d024768_T001	176	87223395-87228172	87223395-87228172	0	protein_coding	29	11
10	87265402	87265440	-	87265425	191	480	3UTR	Zm00001d024770	Zm00001d024770_T001	0	87265402-87267750	87265402-87267750	488	protein_coding	39	10
10	87265489	87265489	-	87265489	3	3	3UTR	Zm00001d024770	Zm00001d024770_T001	0	87265402-87267750	87265402-87267750	488	protein_coding	1	1
10	87265563	87265593	-	87265576	5	11	3UTR	Zm00001d024770	Zm00001d024770_T001	0	87265402-87267750	87265402-87267750	488	protein_coding	31	3
10	87265669	87265669	-	87265669	5	5	3UTR	Zm00001d024770	Zm00001d024770_T001	0	87265402-87267750	87265402-87267750	488	protein_coding	1	1
10	87291331	87291331	-	87291331	3	3	intergenic	Zm00001d024771	Zm00001d024771_T001	315	87291646-87292414	87291646-87292414	79	protein_coding	1	1
10	87291372	87291374	-	87291372	6	12	intergenic	Zm00001d024771	Zm00001d024771_T001	274	87291646-87292414	87291646-87292414	79	protein_coding	3	2
10	87291471	87291471	-	87291471	5	5	intergenic	Zm00001d024771	Zm00001d024771_T001	175	87291646-87292414	87291646-87292414	79	protein_coding	1	1
10	87291643	87291643	-	87291643	4	4	extended	Zm00001d024771	Zm00001d024771_T001	3	87291646-87292414	87291646-87292414	79	protein_coding	1	1
10	87316061	87316065	-	87316061	19	29	intergenic	Zm00001d024771	Zm00001d024771_T001	24415	87291646-87292414	87291646-87292414	79	protein_coding	5	3
10	87316133	87316133	-	87316133	3	3	intergenic	Zm00001d024771	Zm00001d024771_T001	24487	87291646-87292414	87291646-87292414	79	protein_coding	1	1
10	87316176	87316176	-	87316176	3	3	intergenic	Zm00001d024771	Zm00001d024771_T001	24530	87291646-87292414	87291646-87292414	79	protein_coding	1	1
10	87316201	87316228	-	87316228	6	16	intergenic	Zm00001d024771	Zm00001d024771_T001	24582	87291646-87292414	87291646-87292414	79	protein_coding	28	3
10	87316319	87316334	-	87316319	5	9	intergenic	Zm00001d024771	Zm00001d024771_T001	24673	87291646-87292414	87291646-87292414	79	protein_coding	16	2
10	87316421	87316421	-	87316421	5	5	intergenic	Zm00001d024771	Zm00001d024771_T001	24775	87291646-87292414	87291646-87292414	79	protein_coding	1	1
10	87316611	87316611	-	87316611	8	8	intergenic	Zm00001d024771	Zm00001d024771_T001	24965	87291646-87292414	87291646-87292414	79	protein_coding	1	1
10	87398844	87398844	-	87398844	3	3	intergenic	Zm00001d024778	Zm00001d024778_T001	2525	87401369-87401545	87401369-87401545	0	protein_coding	1	1
10	87400112	87400112	-	87400112	3	3	intergenic	Zm00001d024778	Zm00001d024778_T001	1257	87401369-87401545	87401369-87401545	0	protein_coding	1	1
10	87400962	87400974	-	87400966	10	16	extended	Zm00001d024778	Zm00001d024778_T001	403	87401369-87401545	87401369-87401545	0	protein_coding	13	3
10	87401110	87401132	-	87401124	113	264	extended	Zm00001d024778	Zm00001d024778_T001	245	87401369-87401545	87401369-87401545	0	protein_coding	23	11
10	87401157	87401350	-	87401185	7651	21106	extended	Zm00001d024778	Zm00001d024778_T001	184	87401369-87401545	87401369-87401545	0	protein_coding	194	128
10	87401423	87401423	-	87401423	3	3	CDS	Zm00001d024778	Zm00001d024778_T001	0	87401369-87401545	87401369-87401545	0	protein_coding	1	1
10	87401580	87401589	-	87401580	38	54	extended	Zm00001d024778	Zm00001d024778_T001	211	87401369-87401545	87401369-87401545	0	protein_coding	10	2
10	87450626	87450626	-	87450626	5	5	intergenic	Zm00001d024778	Zm00001d024778_T001	49257	87401369-87401545	87401369-87401545	0	protein_coding	1	1
10	87450684	87450684	-	87450684	11	11	intergenic	Zm00001d024778	Zm00001d024778_T001	49315	87401369-87401545	87401369-87401545	0	protein_coding	1	1
10	87450723	87450726	-	87450726	5	9	intergenic	Zm00001d024778	Zm00001d024778_T001	49357	87401369-87401545	87401369-87401545	0	protein_coding	4	2
10	87964162	87964164	-	87964162	5	8	intergenic	Zm00001d024784	Zm00001d024784_T001	9315	87973477-87976336	87973477-87976336	0	protein_coding	3	2
10	87973488	87973488	-	87973488	3	3	CDS	Zm00001d024784	Zm00001d024784_T001	0	87973477-87976336	87973477-87976336	0	protein_coding	1	1
10	87973816	87973839	-	87973839	13	21	intron	Zm00001d024784	Zm00001d024784_T001	0	87973477-87976336	87973477-87976336	0	protein_coding	24	3
10	88284772	88284773	-	88284773	5	8	intergenic	Zm00001d024788	Zm00001d024788_T002	82651	88367424-88377930	88367424-88377930	348	protein_coding	2	2
10	88357917	88357922	-	88357917	5	9	intergenic	Zm00001d024788	Zm00001d024788_T002	9507	88367424-88377930	88367424-88377930	348	protein_coding	6	2
10	88358018	88358018	-	88358018	4	4	intergenic	Zm00001d024788	Zm00001d024788_T002	9406	88367424-88377930	88367424-88377930	348	protein_coding	1	1
10	88367423	88367480	-	88367452	13	39	3UTR	Zm00001d024788	Zm00001d024788_T002	0	88367424-88377930	88367424-88377930	348	protein_coding	58	5
10	88367536	88367536	-	88367536	4	4	3UTR	Zm00001d024788	Zm00001d024788_T002	0	88367424-88377930	88367424-88377930	348	protein_coding	1	1
10	88367563	88367651	-	88367607	103	360	3UTR	Zm00001d024788	Zm00001d024788_T002	0	88367424-88377930	88367424-88377930	348	protein_coding	89	16
10	88557796	88557820	-	88557796	5	10	intergenic	Zm00001d023137	Zm00001d023137_T001	57777	88500019-88502710	88500019-88502710	0	lincRNA	25	2
10	88561349	88561349	-	88561349	3	3	intergenic	Zm00001d023137	Zm00001d023137_T001	61330	88500019-88502710	88500019-88502710	0	lincRNA	1	1
10	88593540	88593540	-	88593540	3	3	intergenic	Zm00001d024798	Zm00001d024798_T001	79967	88673507-88673767	88673507-88673767	0	protein_coding	1	1
10	88673345	88673354	-	88673345	6	10	extended	Zm00001d024798	Zm00001d024798_T001	162	88673507-88673767	88673507-88673767	0	protein_coding	10	2
10	88685123	88685123	-	88685123	5	5	intergenic	Zm00001d024799	Zm00001d024799_T001	1062	88684061-88684357	88684061-88684357	0	protein_coding	1	1
10	88685187	88685187	-	88685187	5	5	intergenic	Zm00001d024799	Zm00001d024799_T001	1126	88684061-88684357	88684061-88684357	0	protein_coding	1	1
10	88699372	88699402	-	88699387	7	15	extended	Zm00001d024800	Zm00001d024800_T001	290	88699677-88699964	88699677-88699964	0	protein_coding	31	3
10	88699541	88699560	-	88699541	5	8	extended	Zm00001d024800	Zm00001d024800_T001	136	88699677-88699964	88699677-88699964	0	protein_coding	20	2
10	88761804	88761924	-	88761834	110	466	3UTR	Zm00001d024804	Zm00001d024804_T003	0	88761813-88768843	88761813-88768843	4971	protein_coding	121	32
10	88765361	88765385	-	88765361	4	8	3UTR	Zm00001d024804	Zm00001d024804_T003	0	88761813-88768843	88761813-88768843	4971	protein_coding	25	2
10	89226185	89226185	-	89226185	5	5	intergenic	Zm00001d023138	Zm00001d023138_T001	44103	89270288-89271539	89270288-89271539	0	lincRNA	1	1
10	89308026	89308068	-	89308068	34	69	extended	Zm00001d024815	Zm00001d024815_T003	141	89308209-89313475	89308209-89313475	241	protein_coding	43	5
10	89308117	89308135	-	89308135	11	21	extended	Zm00001d024815	Zm00001d024815_T003	74	89308209-89313475	89308209-89313475	241	protein_coding	19	2
10	89308172	89308344	-	89308231	640	2608	3UTR	Zm00001d024815	Zm00001d024815_T003	0	89308209-89313475	89308209-89313475	241	protein_coding	173	51
10	89309263	89309294	-	89309283	4	10	CDS	Zm00001d024815	Zm00001d024815_T003	0	89308209-89313475	89308209-89313475	241	protein_coding	32	3
10	89310659	89310659	-	89310659	5	5	CDS	Zm00001d024815	Zm00001d024815_T003	0	89308209-89313475	89308209-89313475	241	protein_coding	1	1
10	89312228	89312228	-	89312228	5	5	CDS	Zm00001d024815	Zm00001d024815_T003	0	89308209-89313475	89308209-89313475	241	protein_coding	1	1
10	89407967	89408110	-	89408049	661	1548	3UTR	Zm00001d024816	Zm00001d024816_T010	0	89407915-89426926	89407915-89426926	308	protein_coding	144	22
10	89408760	89408760	-	89408760	3	3	CDS	Zm00001d024816	Zm00001d024816_T010	0	89407915-89426926	89407915-89426926	308	protein_coding	1	1
10	89686453	89686453	-	89686453	4	4	intergenic	Zm00001d024824	Zm00001d024824_T001	810	89687263-89690813	89687263-89690813	415	protein_coding	1	1
10	89687275	89687436	-	89687316	605	1275	3UTR	Zm00001d024824	Zm00001d024824_T001	0	89687263-89690813	89687263-89690813	415	protein_coding	162	34
10	89687470	89687470	-	89687470	3	3	3UTR	Zm00001d024824	Zm00001d024824_T001	0	89687263-89690813	89687263-89690813	415	protein_coding	1	1
10	89687586	89687586	-	89687586	6	6	3UTR	Zm00001d024824	Zm00001d024824_T001	0	89687263-89690813	89687263-89690813	415	protein_coding	1	1
10	89687879	89687879	-	89687879	3	3	CDS	Zm00001d024824	Zm00001d024824_T001	0	89687263-89690813	89687263-89690813	415	protein_coding	1	1
10	89688108	89688108	-	89688108	3	3	CDS	Zm00001d024824	Zm00001d024824_T001	0	89687263-89690813	89687263-89690813	415	protein_coding	1	1
10	89691601	89691601	-	89691601	6	6	intergenic	Zm00001d024824	Zm00001d024824_T001	4338	89687263-89690813	89687263-89690813	415	protein_coding	1	1
10	89691631	89691631	-	89691631	4	4	intergenic	Zm00001d024824	Zm00001d024824_T001	4368	89687263-89690813	89687263-89690813	415	protein_coding	1	1
10	89732674	89732674	-	89732674	6	6	intergenic	Zm00001d024825	Zm00001d024825_T002	482	89733156-89739279	89733156-89739279	369	protein_coding	1	1
10	89732699	89732699	-	89732699	43	43	intergenic	Zm00001d024825	Zm00001d024825_T002	457	89733156-89739279	89733156-89739279	369	protein_coding	1	1
10	89732806	89732806	-	89732806	12	12	intergenic	Zm00001d024825	Zm00001d024825_T002	350	89733156-89739279	89733156-89739279	369	protein_coding	1	1
10	89732946	89732946	-	89732946	3	3	intergenic	Zm00001d024825	Zm00001d024825_T002	210	89733156-89739279	89733156-89739279	369	protein_coding	1	1
10	89733210	89733300	-	89733243	53	136	3UTR	Zm00001d024825	Zm00001d024825_T002	0	89733156-89739279	89733156-89739279	369	protein_coding	91	12
10	89733325	89733327	-	89733327	7	10	3UTR	Zm00001d024825	Zm00001d024825_T002	0	89733156-89739279	89733156-89739279	369	protein_coding	3	2
10	89733352	89733421	-	89733402	133	461	3UTR	Zm00001d024825	Zm00001d024825_T002	0	89733156-89739279	89733156-89739279	369	protein_coding	70	22
10	89737313	89737313	-	89737313	3	3	intron	Zm00001d024825	Zm00001d024825_T002	0	89733156-89739279	89733156-89739279	369	protein_coding	1	1
10	89889720	89889759	-	89889720	14	55	intergenic	Zm00001d024827	Zm00001d024827_T001	42231	89847489-89852336	89847489-89852336	0	protein_coding	40	6
10	90131309	90131381	-	90131381	39	103	extended	Zm00001d024831	Zm00001d024831_T001	285	90131666-90133501	90131666-90133501	0	protein_coding	73	9
10	90131429	90131452	-	90131440	11	21	extended	Zm00001d024831	Zm00001d024831_T001	226	90131666-90133501	90131666-90133501	0	protein_coding	24	3
10	90131559	90131559	-	90131559	4	4	extended	Zm00001d024831	Zm00001d024831_T001	107	90131666-90133501	90131666-90133501	0	protein_coding	1	1
10	90131619	90131619	-	90131619	3	3	extended	Zm00001d024831	Zm00001d024831_T001	47	90131666-90133501	90131666-90133501	0	protein_coding	1	1
10	90195363	90195397	-	90195384	17	63	3UTR	Zm00001d024835	Zm00001d024835_T001	0	90195370-90197131	90195370-90197131	257	protein_coding	35	9
10	90195425	90195425	-	90195425	15	15	3UTR	Zm00001d024835	Zm00001d024835_T001	0	90195370-90197131	90195370-90197131	257	protein_coding	1	1
10	90195477	90195489	-	90195489	7	10	3UTR	Zm00001d024835	Zm00001d024835_T001	0	90195370-90197131	90195370-90197131	257	protein_coding	13	2
10	90382315	90382367	-	90382325	16	66	intergenic	Zm00001d024839	Zm00001d024839_T001	2109	90384434-90385822	90384434-90385822	214	protein_coding	53	9
10	90383206	90383206	-	90383206	3	3	intergenic	Zm00001d024839	Zm00001d024839_T001	1228	90384434-90385822	90384434-90385822	214	protein_coding	1	1
10	90384352	90384352	-	90384352	3	3	extended	Zm00001d024839	Zm00001d024839_T001	82	90384434-90385822	90384434-90385822	214	protein_coding	1	1
10	90384388	90384587	-	90384460	6730	12772	3UTR	Zm00001d024839	Zm00001d024839_T001	0	90384434-90385822	90384434-90385822	214	protein_coding	200	62
10	90456387	90456387	-	90456387	9	9	extended	Zm00001d024843	Zm00001d024843_T001	63	90456450-90457394	90456450-90457394	0	protein_coding	1	1
10	90671415	90671415	-	90671415	3	3	intergenic	Zm00001d024855	Zm00001d024855_T005	239	90671654-90682705	90671654-90682705	273	protein_coding	1	1
10	90671522	90671524	-	90671524	16	21	extended	Zm00001d024855	Zm00001d024855_T005	130	90671654-90682705	90671654-90682705	273	protein_coding	3	2
10	90671582	90671590	-	90671590	8	12	extended	Zm00001d024855	Zm00001d024855_T005	64	90671654-90682705	90671654-90682705	273	protein_coding	9	2
10	90671629	90671704	-	90671671	398	856	3UTR	Zm00001d024855	Zm00001d024855_T005	0	90671654-90682705	90671654-90682705	273	protein_coding	76	20
10	90671735	90671735	-	90671735	12	12	3UTR	Zm00001d024855	Zm00001d024855_T005	0	90671654-90682705	90671654-90682705	273	protein_coding	1	1
10	90671782	90671782	-	90671782	3	3	3UTR	Zm00001d024855	Zm00001d024855_T005	0	90671654-90682705	90671654-90682705	273	protein_coding	1	1
10	90671817	90672037	-	90671886	712	4509	intron	Zm00001d024855	Zm00001d024855_T005	0	90671654-90682705	90671654-90682705	273	protein_coding	221	80
10	90672062	90672067	-	90672062	3	6	intron	Zm00001d024855	Zm00001d024855_T005	0	90671654-90682705	90671654-90682705	273	protein_coding	6	2
10	91044116	91044129	-	91044116	8	15	intergenic	Zm00001d024861	Zm00001d024861_T005	185	91044301-91048715	91044298-91048715	182	protein_coding	14	3
10	91044252	91044298	-	91044298	46	94	extended	Zm00001d024861	Zm00001d024861_T005	3	91044301-91048715	91044298-91048715	182	protein_coding	47	7
10	91320080	91320080	-	91320080	3	3	extended	Zm00001d024866	Zm00001d024866_T001	303	91320383-91321483	91320383-91321483	0	protein_coding	1	1
10	91402049	91402063	-	91402049	11	16	extended	Zm00001d024868	Zm00001d024868_T001	78	91402127-91402991	91402127-91402991	0	protein_coding	15	2
10	91636650	91636650	-	91636650	4	4	intergenic	Zm00001d024872	Zm00001d024872_T001	37972	91598678-91600142	91598678-91600142	174	protein_coding	1	1
10	91818426	91818430	-	91818426	10	17	extended	Zm00001d024876	Zm00001d024876_T001	160	91818586-91820109	91818586-91820109	0	protein_coding	5	2
10	91818471	91818495	-	91818471	8	23	extended	Zm00001d024876	Zm00001d024876_T001	115	91818586-91820109	91818586-91820109	0	protein_coding	25	4
10	91886783	91886905	-	91886806	351	835	extended	Zm00001d024878	Zm00001d024878_T001	264	91887070-91894300	91887070-91894300	0	protein_coding	123	24
10	92160598	92160598	-	92160598	12	12	extended	Zm00001d024883	Zm00001d024883_T001	191	92160789-92164199	92160789-92164199	0	protein_coding	1	1
10	92160664	92160664	-	92160664	5	5	extended	Zm00001d024883	Zm00001d024883_T001	125	92160789-92164199	92160789-92164199	0	protein_coding	1	1
10	92214969	92214969	-	92214969	7	7	intergenic	Zm00001d024883	Zm00001d024883_T001	54180	92160789-92164199	92160789-92164199	0	protein_coding	1	1
10	92687729	92687729	-	92687729	3	3	intergenic	Zm00001d024885	Zm00001d024885_T001	357431	92330298-92332490	92330298-92332490	0	protein_coding	1	1
10	92687835	92687859	-	92687859	6	10	intergenic	Zm00001d024885	Zm00001d024885_T001	357561	92330298-92332490	92330298-92332490	0	protein_coding	25	2
10	92761236	92761236	-	92761236	5	5	intergenic	Zm00001d024890	Zm00001d024890_T001	291183	93052419-93060560	93052419-93060560	119	protein_coding	1	1
10	93052386	93052486	-	93052469	93	373	3UTR	Zm00001d024890	Zm00001d024890_T001	0	93052419-93060560	93052419-93060560	119	protein_coding	101	14
10	93052520	93052520	-	93052520	3	3	3UTR	Zm00001d024890	Zm00001d024890_T001	0	93052419-93060560	93052419-93060560	119	protein_coding	1	1
10	93052909	93052909	-	93052909	3	3	intron	Zm00001d024890	Zm00001d024890_T001	0	93052419-93060560	93052419-93060560	119	protein_coding	1	1
10	93137386	93137397	-	93137386	3	6	extended	Zm00001d024891	Zm00001d024891_T001	19	93137405-93143070	93137405-93143070	113	protein_coding	12	2
10	93705856	93705875	-	93705873	47	198	intergenic	Zm00001d024900	Zm00001d024900_T001	10992	93694881-93695192	93694881-93695192	0	protein_coding	20	13
10	94179509	94179509	-	94179509	3	3	intergenic	Zm00001d024905	Zm00001d024905_T001	53328	94232837-94233649	94232837-94233649	0	protein_coding	1	1
10	94179548	94179548	-	94179548	17	17	intergenic	Zm00001d024905	Zm00001d024905_T001	53289	94232837-94233649	94232837-94233649	0	protein_coding	1	1
10	94232384	94232384	-	94232384	4	4	extended	Zm00001d024905	Zm00001d024905_T001	453	94232837-94233649	94232837-94233649	0	protein_coding	1	1
10	94232431	94232441	-	94232431	37	48	extended	Zm00001d024905	Zm00001d024905_T001	406	94232837-94233649	94232837-94233649	0	protein_coding	11	4
10	94232520	94232520	-	94232520	9	9	extended	Zm00001d024905	Zm00001d024905_T001	317	94232837-94233649	94232837-94233649	0	protein_coding	1	1
10	94232548	94232548	-	94232548	6	6	extended	Zm00001d024905	Zm00001d024905_T001	289	94232837-94233649	94232837-94233649	0	protein_coding	1	1
10	94232590	94232619	-	94232619	37	65	extended	Zm00001d024905	Zm00001d024905_T001	218	94232837-94233649	94232837-94233649	0	protein_coding	30	5
10	94248528	94248580	-	94248559	29	51	3UTR	Zm00001d024906	Zm00001d024906_T001	0	94248547-94249743	94248547-94249743	93	protein_coding	53	4
10	94269797	94269819	-	94269819	6	10	3UTR	Zm00001d024907	Zm00001d024907_T001	0	94269707-94271102	94269707-94271102	224	protein_coding	23	2
10	94274241	94274313	-	94274281	29	135	3UTR	Zm00001d024908	Zm00001d024908_T003	0	94274262-94281820	94274262-94281820	282	protein_coding	73	11
10	94274461	94274534	-	94274500	233	825	3UTR	Zm00001d024908	Zm00001d024908_T003	0	94274262-94281820	94274262-94281820	282	protein_coding	74	22
10	94430639	94430639	-	94430639	3	3	extended	Zm00001d024909	Zm00001d024909_T001	211	94430850-94433495	94430850-94433495	0	protein_coding	1	1
10	94784473	94784479	-	94784473	11	16	intergenic	Zm00001d024916	Zm00001d024916_T001	120472	94904945-94907435	94904945-94907435	285	protein_coding	7	2
10	94784606	94784606	-	94784606	11	11	intergenic	Zm00001d024916	Zm00001d024916_T001	120339	94904945-94907435	94904945-94907435	285	protein_coding	1	1
10	94784674	94784674	-	94784674	7	7	intergenic	Zm00001d024916	Zm00001d024916_T001	120271	94904945-94907435	94904945-94907435	285	protein_coding	1	1
10	94784887	94784890	-	94784890	11	15	intergenic	Zm00001d024916	Zm00001d024916_T001	120055	94904945-94907435	94904945-94907435	285	protein_coding	4	2
10	94784998	94784998	-	94784998	4	4	intergenic	Zm00001d024916	Zm00001d024916_T001	119947	94904945-94907435	94904945-94907435	285	protein_coding	1	1
10	94904961	94904965	-	94904961	14	19	3UTR	Zm00001d024916	Zm00001d024916_T001	0	94904945-94907435	94904945-94907435	285	protein_coding	5	2
10	94905030	94905065	-	94905030	6	21	3UTR	Zm00001d024916	Zm00001d024916_T001	0	94904945-94907435	94904945-94907435	285	protein_coding	36	5
10	94908317	94908317	-	94908317	3	3	intergenic	Zm00001d024916	Zm00001d024916_T001	3372	94904945-94907435	94904945-94907435	285	protein_coding	1	1
10	94908524	94908621	-	94908599	131	564	intergenic	Zm00001d024916	Zm00001d024916_T001	3654	94904945-94907435	94904945-94907435	285	protein_coding	98	28
10	94908656	94908656	-	94908656	17	17	intergenic	Zm00001d024916	Zm00001d024916_T001	3711	94904945-94907435	94904945-94907435	285	protein_coding	1	1
10	94917326	94917343	-	94917343	20	23	intergenic	Zm00001d024916	Zm00001d024916_T001	12398	94904945-94907435	94904945-94907435	285	protein_coding	18	2
10	94917390	94917390	-	94917390	5	5	intergenic	Zm00001d024916	Zm00001d024916_T001	12445	94904945-94907435	94904945-94907435	285	protein_coding	1	1
10	94917859	94917859	-	94917859	3	3	intergenic	Zm00001d024916	Zm00001d024916_T001	12914	94904945-94907435	94904945-94907435	285	protein_coding	1	1
10	94918020	94918020	-	94918020	4	4	intergenic	Zm00001d024916	Zm00001d024916_T001	13075	94904945-94907435	94904945-94907435	285	protein_coding	1	1
10	94927895	94927895	-	94927895	5	5	intergenic	Zm00001d024916	Zm00001d024916_T001	22950	94904945-94907435	94904945-94907435	285	protein_coding	1	1
10	94986867	94986867	-	94986867	3	3	intergenic	Zm00001d024919	Zm00001d024919_T001	2497	94989364-94991623	94989364-94991623	0	protein_coding	1	1
10	94988854	94988854	-	94988854	5	5	intergenic	Zm00001d024919	Zm00001d024919_T001	510	94989364-94991623	94989364-94991623	0	protein_coding	1	1
10	94988882	94988889	-	94988889	6	10	intergenic	Zm00001d024919	Zm00001d024919_T001	475	94989364-94991623	94989364-94991623	0	protein_coding	8	2
10	95280553	95280588	-	95280555	26	85	3UTR	Zm00001d024925	Zm00001d024925_T001	0	95280553-95281923	95280553-95281923	218	protein_coding	36	9
10	95280639	95280639	-	95280639	3	3	3UTR	Zm00001d024925	Zm00001d024925_T001	0	95280553-95281923	95280553-95281923	218	protein_coding	1	1
10	95315190	95315190	-	95315190	3	3	extended	Zm00001d024926	Zm00001d024926_T001	220	95315410-95315850	95315410-95315850	0	protein_coding	1	1
10	95451194	95451194	-	95451194	3	3	3UTR	Zm00001d024928	Zm00001d024928_T004	0	95451163-95473347	95451163-95473347	394	protein_coding	1	1
10	95451289	95451350	-	95451315	48	127	3UTR	Zm00001d024928	Zm00001d024928_T004	0	95451163-95473347	95451163-95473347	394	protein_coding	62	8
10	95451380	95451380	-	95451380	6	6	3UTR	Zm00001d024928	Zm00001d024928_T004	0	95451163-95473347	95451163-95473347	394	protein_coding	1	1
10	95472479	95472479	-	95472479	4	4	intron	Zm00001d024928	Zm00001d024928_T004	0	95451163-95473347	95451163-95473347	394	protein_coding	1	1
10	95472527	95472528	-	95472527	3	6	intron	Zm00001d024928	Zm00001d024928_T004	0	95451163-95473347	95451163-95473347	394	protein_coding	2	2
10	95623586	95623586	-	95623586	3	3	intergenic	Zm00001d024934	Zm00001d024934_T001	576	95624162-95627278	95624162-95627278	420	protein_coding	1	1
10	95623996	95623996	-	95623996	7	7	intergenic	Zm00001d024934	Zm00001d024934_T001	166	95624162-95627278	95624162-95627278	420	protein_coding	1	1
10	95624104	95624217	-	95624171	91	262	3UTR	Zm00001d024934	Zm00001d024934_T001	0	95624162-95627278	95624162-95627278	420	protein_coding	114	13
10	95624331	95624331	-	95624331	33	33	3UTR	Zm00001d024934	Zm00001d024934_T001	0	95624162-95627278	95624162-95627278	420	protein_coding	1	1
10	95666083	95666112	-	95666083	62	90	CDS	Zm00001d024935	Zm00001d024935_T001	0	95666017-95669076	95666017-95669076	0	protein_coding	30	3
10	95666167	95666169	-	95666169	5	8	intron	Zm00001d024935	Zm00001d024935_T001	0	95666017-95669076	95666017-95669076	0	protein_coding	3	2
10	95666208	95666251	-	95666251	83	104	intron	Zm00001d024935	Zm00001d024935_T001	0	95666017-95669076	95666017-95669076	0	protein_coding	44	6
10	95805299	95805299	-	95805299	3	3	intergenic	Zm00001d024939	Zm00001d024939_T002	127823	95933122-95935711	95933122-95935711	243	protein_coding	1	1
10	95933119	95933121	-	95933119	3	6	extended	Zm00001d024939	Zm00001d024939_T002	3	95933122-95935711	95933122-95935711	243	protein_coding	3	2
10	95933150	95933307	-	95933249	530	1080	3UTR	Zm00001d024939	Zm00001d024939_T002	0	95933122-95935711	95933122-95935711	243	protein_coding	158	31
10	96016369	96016391	-	96016369	19	48	3UTR	Zm00001d024941	Zm00001d024941_T002	0	96015969-96019744	96015969-96019757	667	protein_coding	23	4
10	96016460	96016467	-	96016466	33	45	3UTR	Zm00001d024941	Zm00001d024941_T002	0	96015969-96019744	96015969-96019757	667	protein_coding	8	3
10	96016492	96016516	-	96016510	43	101	3UTR	Zm00001d024941	Zm00001d024941_T002	0	96015969-96019744	96015969-96019757	667	protein_coding	25	6
10	96016598	96016598	-	96016598	5	5	3UTR	Zm00001d024941	Zm00001d024941_T002	0	96015969-96019744	96015969-96019757	667	protein_coding	1	1
10	96016915	96016928	-	96016915	8	14	CDS	Zm00001d024941	Zm00001d024941_T002	0	96015969-96019744	96015969-96019757	667	protein_coding	14	3
10	96016958	96016958	-	96016958	7	7	intron	Zm00001d024941	Zm00001d024941_T002	0	96015969-96019744	96015969-96019757	667	protein_coding	1	1
10	96017220	96017220	-	96017220	5	5	intron	Zm00001d024941	Zm00001d024941_T002	0	96015969-96019744	96015969-96019757	667	protein_coding	1	1
10	96017295	96017295	-	96017295	4	4	intron	Zm00001d024941	Zm00001d024941_T002	0	96015969-96019744	96015969-96019757	667	protein_coding	1	1
10	96017479	96017479	-	96017479	3	3	intron	Zm00001d024941	Zm00001d024941_T002	0	96015969-96019744	96015969-96019757	667	protein_coding	1	1
10	96017689	96017689	-	96017689	4	4	intron	Zm00001d024941	Zm00001d024941_T002	0	96015969-96019744	96015969-96019757	667	protein_coding	1	1
10	96358484	96358488	-	96358484	11	15	3UTR	Zm00001d024947	Zm00001d024947_T003	0	96358474-96363316	96358474-96363316	275	protein_coding	5	2
10	96358637	96358637	-	96358637	5	5	3UTR	Zm00001d024947	Zm00001d024947_T003	0	96358474-96363316	96358474-96363316	275	protein_coding	1	1
10	96586373	96586373	-	96586373	8	8	3UTR	Zm00001d024952	Zm00001d024952_T002	0	96586361-96592679	96586361-96592679	468	protein_coding	1	1
10	96586433	96586531	-	96586497	174	465	3UTR	Zm00001d024952	Zm00001d024952_T002	0	96586361-96592679	96586361-96592679	468	protein_coding	99	17
10	96586563	96586563	-	96586563	5	5	3UTR	Zm00001d024952	Zm00001d024952_T002	0	96586361-96592679	96586361-96592679	468	protein_coding	1	1
10	96594241	96594241	-	96594241	3	3	intergenic	Zm00001d024952	Zm00001d024952_T002	7880	96586361-96592679	96586361-96592679	468	protein_coding	1	1
10	96630776	96630787	-	96630776	38	68	3UTR	Zm00001d024953	Zm00001d024953_T005	0	96630696-96658868	96630696-96658868	1098	protein_coding	12	5
10	96630836	96630855	-	96630855	11	17	3UTR	Zm00001d024953	Zm00001d024953_T005	0	96630696-96658868	96630696-96658868	1098	protein_coding	20	2
10	96631761	96631761	-	96631761	13	13	3UTR	Zm00001d024953	Zm00001d024953_T005	0	96630696-96658868	96630696-96658868	1098	protein_coding	1	1
10	96641717	96641717	-	96641717	3	3	intron	Zm00001d024953	Zm00001d024953_T005	0	96630696-96658868	96630696-96658868	1098	protein_coding	1	1
10	96654765	96654765	-	96654765	4	4	intron	Zm00001d024953	Zm00001d024953_T005	0	96630696-96658868	96630696-96658868	1098	protein_coding	1	1
10	96940097	96940097	-	96940097	3	3	intergenic	Zm00001d024961	Zm00001d024961_T001	8167	96948264-96950890	96948264-96950890	250	protein_coding	1	1
10	96951108	96951108	-	96951108	5	5	intergenic	Zm00001d024961	Zm00001d024961_T001	2844	96948264-96950890	96948264-96950890	250	protein_coding	1	1
10	96969373	96969374	-	96969374	83	88	extended	Zm00001d024963	Zm00001d024963_T001	138	96969512-96970459	96969512-96970459	138	protein_coding	2	2
10	96969427	96969599	-	96969564	2820	7906	3UTR	Zm00001d024963	Zm00001d024963_T001	0	96969512-96970459	96969512-96970459	138	protein_coding	173	54
10	97101560	97101564	-	97101560	3	6	extended	Zm00001d024965	Zm00001d024965_T004	90	97101650-97106765	97101650-97106765	469	protein_coding	5	2
10	97101674	97101726	-	97101697	85	173	3UTR	Zm00001d024965	Zm00001d024965_T004	0	97101650-97106765	97101650-97106765	469	protein_coding	53	14
10	97101829	97101889	-	97101847	427	1107	3UTR	Zm00001d024965	Zm00001d024965_T004	0	97101650-97106765	97101650-97106765	469	protein_coding	61	27
10	97101938	97101951	-	97101938	3	6	3UTR	Zm00001d024965	Zm00001d024965_T004	0	97101650-97106765	97101650-97106765	469	protein_coding	14	2
10	97204696	97204699	-	97204696	15	18	3UTR	Zm00001d024966	Zm00001d024966_T001	0	97204693-97208271	97204693-97208271	230	protein_coding	4	2
10	97204726	97204836	-	97204753	191	478	3UTR	Zm00001d024966	Zm00001d024966_T001	0	97204693-97208271	97204693-97208271	230	protein_coding	111	23
10	97249521	97249528	-	97249528	54	63	extended	Zm00001d024967	Zm00001d024967_T001	276	97249804-97279351	97249804-97279351	0	protein_coding	8	2
10	97261200	97261215	-	97261215	38	44	intron	Zm00001d024967	Zm00001d024967_T001	0	97249804-97279351	97249804-97279351	0	protein_coding	16	2
10	97272557	97272557	-	97272557	3	3	intron	Zm00001d024967	Zm00001d024967_T001	0	97249804-97279351	97249804-97279351	0	protein_coding	1	1
10	97882511	97882522	-	97882522	20	26	extended	Zm00001d024982	Zm00001d024982_T001	2	97882524-97885868	97882524-97885868	41	protein_coding	12	2
10	98173958	98173958	-	98173958	3	3	intergenic	Zm00001d024990	Zm00001d024990_T001	74286	98099672-98113821	98099672-98113821	278	protein_coding	1	1
10	98297335	98297335	-	98297335	3	3	intergenic	Zm00001d024995	Zm00001d024995_T001	18998	98278337-98280161	98278337-98280161	116	protein_coding	1	1
10	98768626	98768654	-	98768631	46	83	extended	Zm00001d025002	Zm00001d025002_T002	2	98768633-98772678	98768633-98772678	663	protein_coding	29	5
10	99104369	99104381	-	99104369	5	12	intergenic	Zm00001d025005	Zm00001d025005_T001	113017	99217386-99219471	99217386-99219471	494	protein_coding	13	3
10	99104447	99104455	-	99104455	4	7	intergenic	Zm00001d025005	Zm00001d025005_T001	112931	99217386-99219471	99217386-99219471	494	protein_coding	9	2
10	99217388	99217388	-	99217388	4	4	3UTR	Zm00001d025005	Zm00001d025005_T001	0	99217386-99219471	99217386-99219471	494	protein_coding	1	1
10	99217492	99217492	-	99217492	4	4	3UTR	Zm00001d025005	Zm00001d025005_T001	0	99217386-99219471	99217386-99219471	494	protein_coding	1	1
10	99217542	99217542	-	99217542	4	4	3UTR	Zm00001d025005	Zm00001d025005_T001	0	99217386-99219471	99217386-99219471	494	protein_coding	1	1
10	99248860	99248860	-	99248860	6	6	intergenic	Zm00001d025005	Zm00001d025005_T001	31474	99217386-99219471	99217386-99219471	494	protein_coding	1	1
10	99311345	99311345	-	99311345	5	5	intergenic	Zm00001d025006	Zm00001d025006_T001	4626	99306719-99308794	99306719-99308794	0	protein_coding	1	1
10	99428659	99428680	-	99428674	104	215	3UTR	Zm00001d025008	Zm00001d025008_T001	0	99428647-99432260	99428647-99432260	438	protein_coding	22	9
10	99428713	99428713	-	99428713	7	7	3UTR	Zm00001d025008	Zm00001d025008_T001	0	99428647-99432260	99428647-99432260	438	protein_coding	1	1
10	99428743	99428750	-	99428750	13	22	3UTR	Zm00001d025008	Zm00001d025008_T001	0	99428647-99432260	99428647-99432260	438	protein_coding	8	3
10	99428791	99428794	-	99428791	3	6	3UTR	Zm00001d025008	Zm00001d025008_T001	0	99428647-99432260	99428647-99432260	438	protein_coding	4	2
10	99429044	99429044	-	99429044	14	14	3UTR	Zm00001d025008	Zm00001d025008_T001	0	99428647-99432260	99428647-99432260	438	protein_coding	1	1
10	99533847	99533854	-	99533854	9	12	extended	Zm00001d025010	Zm00001d025010_T007	59	99533913-99544932	99533913-99544932	3046	protein_coding	8	2
10	99533919	99534070	-	99533933	207	581	3UTR	Zm00001d025010	Zm00001d025010_T007	0	99533913-99544932	99533913-99544932	3046	protein_coding	152	27
10	99534106	99534110	-	99534106	12	25	3UTR	Zm00001d025010	Zm00001d025010_T007	0	99533913-99544932	99533913-99544932	3046	protein_coding	5	3
10	99534142	99534201	-	99534161	19	77	3UTR	Zm00001d025010	Zm00001d025010_T007	0	99533913-99544932	99533913-99544932	3046	protein_coding	60	7
10	99537745	99537745	-	99537745	4	4	3UTR	Zm00001d025010	Zm00001d025010_T007	0	99533913-99544932	99533913-99544932	3046	protein_coding	1	1
10	99634985	99634985	-	99634985	3	3	intergenic	Zm00001d025011	Zm00001d025011_T001	858	99635843-99638554	99635843-99638554	373	protein_coding	1	1
10	99635846	99635846	-	99635846	4	4	3UTR	Zm00001d025011	Zm00001d025011_T001	0	99635843-99638554	99635843-99638554	373	protein_coding	1	1
10	99635877	99636037	-	99636007	115	655	3UTR	Zm00001d025011	Zm00001d025011_T001	0	99635843-99638554	99635843-99638554	373	protein_coding	161	38
10	99642386	99642386	-	99642386	5	5	3UTR	Zm00001d025012	Zm00001d025012_T002	0	99642235-99660548	99642235-99660548	392	protein_coding	1	1
10	99642435	99642462	-	99642437	31	42	3UTR	Zm00001d025012	Zm00001d025012_T002	0	99642235-99660548	99642235-99660548	392	protein_coding	28	4
10	99642502	99642514	-	99642502	6	9	3UTR	Zm00001d025012	Zm00001d025012_T002	0	99642235-99660548	99642235-99660548	392	protein_coding	13	2
10	99642544	99642563	-	99642544	56	60	3UTR	Zm00001d025012	Zm00001d025012_T002	0	99642235-99660548	99642235-99660548	392	protein_coding	20	2
10	99717215	99717239	-	99717215	28	36	intergenic	Zm00001d025012	Zm00001d025012_T002	74980	99642235-99660548	99642235-99660548	392	protein_coding	25	3
10	99718479	99718536	-	99718505	24	96	intergenic	Zm00001d025012	Zm00001d025012_T002	76270	99642235-99660548	99642235-99660548	392	protein_coding	58	10
10	99718573	99718590	-	99718590	4	7	intergenic	Zm00001d025012	Zm00001d025012_T002	76355	99642235-99660548	99642235-99660548	392	protein_coding	18	2
10	99718622	99718653	-	99718653	344	1236	intergenic	Zm00001d025012	Zm00001d025012_T002	76418	99642235-99660548	99642235-99660548	392	protein_coding	32	16
10	99816440	99816440	-	99816440	3	3	intergenic	Zm00001d025017	Zm00001d025017_T001	1046	99817486-99819538	99817486-99819538	1379	protein_coding	1	1
10	99826236	99826236	-	99826236	3	3	intergenic	Zm00001d025017	Zm00001d025017_T001	8750	99817486-99819538	99817486-99819538	1379	protein_coding	1	1
10	99859551	99859551	-	99859551	4	4	intergenic	Zm00001d025017	Zm00001d025017_T001	42065	99817486-99819538	99817486-99819538	1379	protein_coding	1	1
10	99992743	99992772	-	99992765	512	1543	3UTR	Zm00001d025020	Zm00001d025020_T002	0	99992761-99998509	99992757-99998509	246	protein_coding	30	20
10	99992801	99992929	-	99992841	267	976	3UTR	Zm00001d025020	Zm00001d025020_T002	0	99992761-99998509	99992757-99998509	246	protein_coding	129	37
10	99994022	99994022	-	99994022	3	3	intron	Zm00001d025020	Zm00001d025020_T002	0	99992761-99998509	99992757-99998509	246	protein_coding	1	1
10	99997616	99997616	-	99997616	6	6	intron	Zm00001d025020	Zm00001d025020_T002	0	99992761-99998509	99992757-99998509	246	protein_coding	1	1
10	99997641	99997662	-	99997643	16	34	intron	Zm00001d025020	Zm00001d025020_T002	0	99992761-99998509	99992757-99998509	246	protein_coding	22	3
10	99997691	99997701	-	99997701	14	26	intron	Zm00001d025020	Zm00001d025020_T002	0	99992761-99998509	99992757-99998509	246	protein_coding	11	3
10	99997785	99997785	-	99997785	5	5	intron	Zm00001d025020	Zm00001d025020_T002	0	99992761-99998509	99992757-99998509	246	protein_coding	1	1
10	100002432	100002457	-	100002432	19	42	3UTR	Zm00001d025021	Zm00001d025021_T003	0	100002393-100008219	100002393-100008244	167	protein_coding	26	3
10	100002527	100002527	-	100002527	3	3	3UTR	Zm00001d025021	Zm00001d025021_T003	0	100002393-100008219	100002393-100008244	167	protein_coding	1	1
10	100002561	100002561	-	100002561	3	3	CDS	Zm00001d025021	Zm00001d025021_T003	0	100002393-100008219	100002393-100008244	167	protein_coding	1	1
10	100055457	100055464	-	100055458	62	90	3UTR	Zm00001d025023	Zm00001d025023_T001	0	100055458-100060317	100055458-100060317	236	protein_coding	8	4
10	100055497	100055511	-	100055504	11	26	3UTR	Zm00001d025023	Zm00001d025023_T001	0	100055458-100060317	100055458-100060317	236	protein_coding	15	4
10	100055563	100055565	-	100055563	21	29	3UTR	Zm00001d025023	Zm00001d025023_T001	0	100055458-100060317	100055458-100060317	236	protein_coding	3	2
10	100056825	100056825	-	100056825	3	3	intron	Zm00001d025023	Zm00001d025023_T001	0	100055458-100060317	100055458-100060317	236	protein_coding	1	1
10	100056936	100056936	-	100056936	4	4	intron	Zm00001d025023	Zm00001d025023_T001	0	100055458-100060317	100055458-100060317	236	protein_coding	1	1
10	100278388	100278388	-	100278388	5	5	extended	Zm00001d025025	Zm00001d025025_T001	40	100278428-100281818	100278428-100281818	138	protein_coding	1	1
10	100278433	100278462	-	100278456	57	73	3UTR	Zm00001d025025	Zm00001d025025_T001	0	100278428-100281818	100278428-100281818	138	protein_coding	30	4
10	100278504	100278521	-	100278504	12	19	3UTR	Zm00001d025025	Zm00001d025025_T001	0	100278428-100281818	100278428-100281818	138	protein_coding	18	3
10	100543845	100543848	-	100543845	15	19	3UTR	Zm00001d025031	Zm00001d025031_T002	0	100543845-100549482	100543845-100549482	143	protein_coding	4	2
10	100593503	100593595	-	100593577	106	166	extended	Zm00001d025033	Zm00001d025033_T001	189	100593766-100594296	100593766-100594296	0	protein_coding	93	11
10	100649027	100649122	-	100649028	149	536	3UTR	Zm00001d025034	Zm00001d025034_T003	0	100648946-100657147	100648946-100657147	417	protein_coding	96	21
10	100649156	100649156	-	100649156	5	5	3UTR	Zm00001d025034	Zm00001d025034_T003	0	100648946-100657147	100648946-100657147	417	protein_coding	1	1
10	100649184	100649215	-	100649215	31	39	3UTR	Zm00001d025034	Zm00001d025034_T003	0	100648946-100657147	100648946-100657147	417	protein_coding	32	3
10	100649240	100649240	-	100649240	5	5	3UTR	Zm00001d025034	Zm00001d025034_T003	0	100648946-100657147	100648946-100657147	417	protein_coding	1	1
10	100748310	100748396	-	100748327	13	54	extended	Zm00001d025035	Zm00001d025035_T001	250	100748577-100750979	100748577-100750979	0	protein_coding	87	9
10	100773427	100773428	-	100773427	4	7	3UTR	Zm00001d025036	Zm00001d025036_T003	0	100773356-100775278	100773356-100775278	194	protein_coding	2	2
10	101193560	101193560	-	101193560	3	3	intergenic	Zm00001d025043	Zm00001d025043_T001	13362	101206922-101214479	101206922-101214479	306	protein_coding	1	1
10	101206921	101207082	-	101207035	205	915	3UTR	Zm00001d025043	Zm00001d025043_T001	0	101206922-101214479	101206922-101214479	306	protein_coding	162	41
10	101207399	101207399	-	101207399	3	3	intron	Zm00001d025043	Zm00001d025043_T001	0	101206922-101214479	101206922-101214479	306	protein_coding	1	1
10	101378922	101378922	-	101378922	4	4	intergenic	Zm00001d025047	Zm00001d025047_T001	147031	101525953-101527964	101525953-101527964	286	protein_coding	1	1
10	101526026	101526030	-	101526026	21	29	3UTR	Zm00001d025047	Zm00001d025047_T001	0	101525953-101527964	101525953-101527964	286	protein_coding	5	2
10	101561278	101561355	-	101561329	317	769	extended	Zm00001d025048	Zm00001d025048_T003	16	101561345-101582556	101561345-101582556	230	protein_coding	78	22
10	101561388	101561388	-	101561388	3	3	3UTR	Zm00001d025048	Zm00001d025048_T003	0	101561345-101582556	101561345-101582556	230	protein_coding	1	1
10	101581873	101581873	-	101581873	3	3	intron	Zm00001d025048	Zm00001d025048_T003	0	101561345-101582556	101561345-101582556	230	protein_coding	1	1
10	101582053	101582053	-	101582053	11	11	intron	Zm00001d025048	Zm00001d025048_T003	0	101561345-101582556	101561345-101582556	230	protein_coding	1	1
10	101582103	101582107	-	101582103	4	8	intron	Zm00001d025048	Zm00001d025048_T003	0	101561345-101582556	101561345-101582556	230	protein_coding	5	2
10	101678323	101678325	-	101678325	5	12	3UTR	Zm00001d025050	Zm00001d025050_T002	0	101678128-101682830	101678128-101682933	956	protein_coding	3	3
10	101678390	101678390	-	101678390	5	5	3UTR	Zm00001d025050	Zm00001d025050_T002	0	101678128-101682830	101678128-101682933	956	protein_coding	1	1
10	101678462	101678462	-	101678462	8	8	3UTR	Zm00001d025050	Zm00001d025050_T002	0	101678128-101682830	101678128-101682933	956	protein_coding	1	1
10	101678740	101678763	-	101678763	29	32	3UTR	Zm00001d025050	Zm00001d025050_T002	0	101678128-101682830	101678128-101682933	956	protein_coding	24	2
10	101678794	101678797	-	101678794	9	15	3UTR	Zm00001d025050	Zm00001d025050_T002	0	101678128-101682830	101678128-101682933	956	protein_coding	4	2
10	101678969	101678969	-	101678969	20	20	3UTR	Zm00001d025050	Zm00001d025050_T002	0	101678128-101682830	101678128-101682933	956	protein_coding	1	1
10	101679012	101679077	-	101679026	107	280	3UTR	Zm00001d025050	Zm00001d025050_T002	0	101678128-101682830	101678128-101682933	956	protein_coding	66	16
10	102067848	102067848	-	102067848	3	3	intergenic	Zm00001d025056	Zm00001d025056_T001	146707	101921141-101923394	101921141-101923394	0	protein_coding	1	1
10	102246860	102246865	-	102246860	14	18	extended	Zm00001d025062	Zm00001d025062_T001	53	102246913-102250054	102246913-102250054	253	protein_coding	6	2
10	102246904	102247063	-	102246983	324	1754	3UTR	Zm00001d025062	Zm00001d025062_T001	0	102246913-102250054	102246913-102250054	253	protein_coding	160	43
10	102254405	102254406	-	102254405	9	12	extended	Zm00001d025063	Zm00001d025063_T005	53	102254458-102258676	102254458-102258676	244	protein_coding	2	2
10	102254434	102254569	-	102254486	157	1313	3UTR	Zm00001d025063	Zm00001d025063_T005	0	102254458-102258676	102254458-102258676	244	protein_coding	136	39
10	102258113	102258113	-	102258113	4	4	5UTR	Zm00001d025063	Zm00001d025063_T005	0	102254458-102258676	102254458-102258676	244	protein_coding	1	1
10	102424618	102424651	-	102424651	10	24	extended	Zm00001d025067	Zm00001d025067_T002	4	102424655-102432854	102424604-102432854	669	protein_coding	34	4
10	102424677	102424720	-	102424677	14	27	3UTR	Zm00001d025067	Zm00001d025067_T002	0	102424655-102432854	102424604-102432854	669	protein_coding	44	3
10	102424746	102424760	-	102424759	11	23	3UTR	Zm00001d025067	Zm00001d025067_T002	0	102424655-102432854	102424604-102432854	669	protein_coding	15	3
10	102424790	102424859	-	102424794	12	29	3UTR	Zm00001d025067	Zm00001d025067_T002	0	102424655-102432854	102424604-102432854	669	protein_coding	70	6
10	102425089	102425101	-	102425100	18	24	3UTR	Zm00001d025067	Zm00001d025067_T002	0	102424655-102432854	102424604-102432854	669	protein_coding	13	3
10	102595534	102595534	-	102595534	7	7	intergenic	Zm00001d025073	Zm00001d025073_T001	42995	102552539-102554879	102552539-102554879	146	protein_coding	1	1
10	102770423	102770515	-	102770494	127	337	3UTR	Zm00001d025075	Zm00001d025075_T004	0	102770463-102774619	102770463-102774619	216	protein_coding	93	17
10	102770597	102770597	-	102770597	5	5	3UTR	Zm00001d025075	Zm00001d025075_T004	0	102770463-102774619	102770463-102774619	216	protein_coding	1	1
10	102821177	102821327	-	102821308	56	199	3UTR	Zm00001d025079	Zm00001d025079_T001	0	102821133-102823238	102821133-102823238	546	protein_coding	151	17
10	102821371	102821371	-	102821371	3	3	3UTR	Zm00001d025079	Zm00001d025079_T001	0	102821133-102823238	102821133-102823238	546	protein_coding	1	1
10	102821478	102821492	-	102821478	15	34	3UTR	Zm00001d025079	Zm00001d025079_T001	0	102821133-102823238	102821133-102823238	546	protein_coding	15	4
10	102827238	102827241	-	102827241	4	7	intergenic	Zm00001d025080	Zm00001d025080_T001	978	102828219-102829001	102828219-102829001	0	protein_coding	4	2
10	102828284	102828284	-	102828284	4	4	intron	Zm00001d025080	Zm00001d025080_T001	0	102828219-102829001	102828219-102829001	0	protein_coding	1	1
10	102849952	102849952	-	102849952	4	4	intergenic	Zm00001d023150	Zm00001d023150_T001	1159	102851111-102851750	102851111-102851750	0	lincRNA	1	1
10	102855788	102855799	-	102855798	10	25	3UTR	Zm00001d025081	Zm00001d025081_T002	0	102855786-102857533	102855786-102857533	246	protein_coding	12	3
10	102855840	102855864	-	102855863	32	38	3UTR	Zm00001d025081	Zm00001d025081_T002	0	102855786-102857533	102855786-102857533	246	protein_coding	25	3
10	102855902	102855961	-	102855910	503	793	3UTR	Zm00001d025081	Zm00001d025081_T002	0	102855786-102857533	102855786-102857533	246	protein_coding	60	14
10	102856176	102856185	-	102856176	13	19	intron	Zm00001d025081	Zm00001d025081_T002	0	102855786-102857533	102855786-102857533	246	protein_coding	10	3
10	102856254	102856272	-	102856258	59	118	intron	Zm00001d025081	Zm00001d025081_T002	0	102855786-102857533	102855786-102857533	246	protein_coding	19	8
10	102856301	102856301	-	102856301	6	6	intron	Zm00001d025081	Zm00001d025081_T002	0	102855786-102857533	102855786-102857533	246	protein_coding	1	1
10	103787243	103787243	-	103787243	4	4	intergenic	Zm00001d025094	Zm00001d025094_T002	89660	103697583-103700217	103697583-103700217	863	protein_coding	1	1
10	103948290	103948290	-	103948290	3	3	intron	Zm00001d025099	Zm00001d025099_T001	0	103947429-103948783	103947429-103948783	0	protein_coding	1	1
10	104005221	104005296	-	104005288	98	181	3UTR	Zm00001d025100	Zm00001d025100_T003	0	104005267-104026749	104005267-104026749	3134	protein_coding	76	10
10	104005321	104005444	-	104005380	740	2635	3UTR	Zm00001d025100	Zm00001d025100_T003	0	104005267-104026749	104005267-104026749	3134	protein_coding	124	42
10	104005854	104005878	-	104005870	4	13	intron	Zm00001d025100	Zm00001d025100_T003	0	104005267-104026749	104005267-104026749	3134	protein_coding	25	4
10	104005914	104005915	-	104005915	5	9	intron	Zm00001d025100	Zm00001d025100_T003	0	104005267-104026749	104005267-104026749	3134	protein_coding	2	2
10	104005943	104005948	-	104005948	7	12	intron	Zm00001d025100	Zm00001d025100_T003	0	104005267-104026749	104005267-104026749	3134	protein_coding	6	2
10	104010180	104010180	-	104010180	4	4	intron	Zm00001d025100	Zm00001d025100_T003	0	104005267-104026749	104005267-104026749	3134	protein_coding	1	1
10	104165034	104165036	-	104165034	13	16	intergenic	Zm00001d025103	Zm00001d025103_T001	54127	104219161-104224390	104219161-104224390	273	protein_coding	3	2
10	104219051	104219051	-	104219051	5	5	extended	Zm00001d025103	Zm00001d025103_T001	110	104219161-104224390	104219161-104224390	273	protein_coding	1	1
10	104219187	104219191	-	104219187	5	9	3UTR	Zm00001d025103	Zm00001d025103_T001	0	104219161-104224390	104219161-104224390	273	protein_coding	5	2
10	104219298	104219298	-	104219298	3	3	3UTR	Zm00001d025103	Zm00001d025103_T001	0	104219161-104224390	104219161-104224390	273	protein_coding	1	1
10	104272554	104272619	-	104272562	27	81	extended	Zm00001d025104	Zm00001d025104_T002	263	104272825-104280111	104272691-104280111	0	protein_coding	66	8
10	104272662	104272662	-	104272662	8	8	extended	Zm00001d025104	Zm00001d025104_T002	163	104272825-104280111	104272691-104280111	0	protein_coding	1	1
10	104272690	104272724	-	104272710	149	287	extended	Zm00001d025104	Zm00001d025104_T002	115	104272825-104280111	104272691-104280111	0	protein_coding	35	8
10	104272923	104272923	-	104272923	3	3	CDS	Zm00001d025104	Zm00001d025104_T002	0	104272825-104280111	104272691-104280111	0	protein_coding	1	1
10	104320860	104320860	-	104320860	7	7	intergenic	Zm00001d025105	Zm00001d025105_T001	37783	104358643-104361481	104358643-104361481	0	protein_coding	1	1
10	104330896	104330896	-	104330896	4	4	intergenic	Zm00001d025105	Zm00001d025105_T001	27747	104358643-104361481	104358643-104361481	0	protein_coding	1	1
10	104574163	104574370	-	104574345	215	837	extended	Zm00001d025107	Zm00001d025107_T001	72	104574417-104575544	104574417-104575544	0	protein_coding	208	42
10	104595745	104595745	-	104595745	3	3	intergenic	Zm00001d025107	Zm00001d025107_T001	21328	104574417-104575544	104574417-104575544	0	protein_coding	1	1
10	104739466	104739468	-	104739468	6	9	intergenic	Zm00001d025108	Zm00001d025108_T001	4470	104743938-104745122	104743938-104745122	0	protein_coding	3	2
10	104816795	104816810	-	104816795	3	6	extended	Zm00001d025110	Zm00001d025110_T001	447	104816348-104816420	104816348-104816420	0	tRNA	16	2
10	104817396	104817411	-	104817411	11	14	3UTR	Zm00001d025111	Zm00001d025111_T007	0	104817352-104841697	104817352-104841697	1126	protein_coding	16	2
10	104817443	104817443	-	104817443	3	3	3UTR	Zm00001d025111	Zm00001d025111_T007	0	104817352-104841697	104817352-104841697	1126	protein_coding	1	1
10	104817471	104817486	-	104817486	8	13	3UTR	Zm00001d025111	Zm00001d025111_T007	0	104817352-104841697	104817352-104841697	1126	protein_coding	16	2
10	104817514	104817514	-	104817514	5	5	3UTR	Zm00001d025111	Zm00001d025111_T007	0	104817352-104841697	104817352-104841697	1126	protein_coding	1	1
10	104817573	104817639	-	104817597	51	182	3UTR	Zm00001d025111	Zm00001d025111_T007	0	104817352-104841697	104817352-104841697	1126	protein_coding	67	11
10	104817667	104817699	-	104817674	168	345	3UTR	Zm00001d025111	Zm00001d025111_T007	0	104817352-104841697	104817352-104841697	1126	protein_coding	33	12
10	105639659	105639886	-	105639854	160	845	intron	Zm00001d025128	Zm00001d025128_T004	0	105638368-105648955	105638368-105648955	27	protein_coding	228	47
10	105644168	105644168	-	105644168	3	3	CDS	Zm00001d025128	Zm00001d025128_T004	0	105638368-105648955	105638368-105648955	27	protein_coding	1	1
10	105645075	105645075	-	105645075	5	5	intron	Zm00001d025128	Zm00001d025128_T004	0	105638368-105648955	105638368-105648955	27	protein_coding	1	1
10	105692268	105692268	-	105692268	4	4	intergenic	Zm00001d025130	Zm00001d025130_T001	158	105692426-105720443	105692426-105720443	196	protein_coding	1	1
10	105692320	105692344	-	105692320	3	6	extended	Zm00001d025130	Zm00001d025130_T001	106	105692426-105720443	105692426-105720443	196	protein_coding	25	2
10	105692424	105692424	-	105692424	5	5	extended	Zm00001d025130	Zm00001d025130_T001	2	105692426-105720443	105692426-105720443	196	protein_coding	1	1
10	105692495	105692495	-	105692495	7	7	3UTR	Zm00001d025130	Zm00001d025130_T001	0	105692426-105720443	105692426-105720443	196	protein_coding	1	1
10	105692546	105692546	-	105692546	3	3	3UTR	Zm00001d025130	Zm00001d025130_T001	0	105692426-105720443	105692426-105720443	196	protein_coding	1	1
10	105692580	105692580	-	105692580	9	9	3UTR	Zm00001d025130	Zm00001d025130_T001	0	105692426-105720443	105692426-105720443	196	protein_coding	1	1
10	105715372	105715372	-	105715372	5	5	intron	Zm00001d025130	Zm00001d025130_T001	0	105692426-105720443	105692426-105720443	196	protein_coding	1	1
10	106318785	106318815	-	106318813	156	204	3UTR	Zm00001d025141	Zm00001d025141_T002	0	106318787-106321238	106318787-106321238	296	protein_coding	31	7
10	106318862	106318862	-	106318862	3	3	3UTR	Zm00001d025141	Zm00001d025141_T002	0	106318787-106321238	106318787-106321238	296	protein_coding	1	1
10	106318900	106318900	-	106318900	8	8	3UTR	Zm00001d025141	Zm00001d025141_T002	0	106318787-106321238	106318787-106321238	296	protein_coding	1	1
10	106319670	106319670	-	106319670	15	15	intron	Zm00001d025141	Zm00001d025141_T002	0	106318787-106321238	106318787-106321238	296	protein_coding	1	1
10	106319702	106319702	-	106319702	6	6	intron	Zm00001d025141	Zm00001d025141_T002	0	106318787-106321238	106318787-106321238	296	protein_coding	1	1
10	106320136	106320136	-	106320136	3	3	intron	Zm00001d025141	Zm00001d025141_T002	0	106318787-106321238	106318787-106321238	296	protein_coding	1	1
10	106376722	106376722	-	106376722	3	3	intergenic	Zm00001d025142	Zm00001d025142_T001	1046	106377768-106379081	106377768-106379081	0	protein_coding	1	1
10	106620161	106620161	-	106620161	3	3	intergenic	Zm00001d025149	Zm00001d025149_T001	8849	106629010-106638259	106629010-106638259	0	protein_coding	1	1
10	106628577	106628591	-	106628591	5	8	extended	Zm00001d025149	Zm00001d025149_T001	419	106629010-106638259	106629010-106638259	0	protein_coding	15	2
10	106628706	106628945	-	106628789	167	958	extended	Zm00001d025149	Zm00001d025149_T001	221	106629010-106638259	106629010-106638259	0	protein_coding	240	42
10	106628972	106628972	-	106628972	3	3	extended	Zm00001d025149	Zm00001d025149_T001	38	106629010-106638259	106629010-106638259	0	protein_coding	1	1
10	106763893	106763893	-	106763893	4	4	extended	Zm00001d025152	Zm00001d025152_T001	118	106764011-106766200	106764011-106766200	0	protein_coding	1	1
10	106763947	106764026	-	106763997	7	31	extended	Zm00001d025152	Zm00001d025152_T001	14	106764011-106766200	106764011-106766200	0	protein_coding	80	6
10	106777064	106777150	-	106777103	131	412	3UTR	Zm00001d025153	Zm00001d025153_T004	0	106777076-106807515	106777076-106807515	143	protein_coding	87	15
10	106790192	106790192	-	106790192	5	5	intron	Zm00001d025153	Zm00001d025153_T004	0	106777076-106807515	106777076-106807515	143	protein_coding	1	1
10	106797742	106797742	-	106797742	4	4	intron	Zm00001d025153	Zm00001d025153_T004	0	106777076-106807515	106777076-106807515	143	protein_coding	1	1
10	106807051	106807051	-	106807051	3	3	5UTR	Zm00001d025153	Zm00001d025153_T004	0	106777076-106807515	106777076-106807515	143	protein_coding	1	1
10	107030410	107030410	-	107030410	3	3	intergenic	Zm00001d025162	Zm00001d025162_T001	508	107030918-107032108	107030918-107032108	0	protein_coding	1	1
10	107030487	107030511	-	107030511	13	20	extended	Zm00001d025162	Zm00001d025162_T001	407	107030918-107032108	107030918-107032108	0	protein_coding	25	3
10	107030595	107030595	-	107030595	3	3	extended	Zm00001d025162	Zm00001d025162_T001	323	107030918-107032108	107030918-107032108	0	protein_coding	1	1
10	107030858	107030858	-	107030858	23	23	extended	Zm00001d025162	Zm00001d025162_T001	60	107030918-107032108	107030918-107032108	0	protein_coding	1	1
10	107030899	107030920	-	107030920	6	9	CDS	Zm00001d025162	Zm00001d025162_T001	0	107030918-107032108	107030918-107032108	0	protein_coding	22	2
10	107031381	107031407	-	107031407	14	25	intron	Zm00001d025162	Zm00001d025162_T001	0	107030918-107032108	107030918-107032108	0	protein_coding	27	3
10	107141779	107141795	-	107141779	3	6	extended	Zm00001d025166	Zm00001d025166_T001	128	107141907-107144555	107141907-107144555	309	protein_coding	17	2
10	107141857	107142121	-	107141970	632	5003	3UTR	Zm00001d025166	Zm00001d025166_T001	0	107141907-107144555	107141907-107144555	309	protein_coding	265	85
10	107144110	107144161	-	107144126	9	20	intron	Zm00001d025166	Zm00001d025166_T001	0	107141907-107144555	107141907-107144555	309	protein_coding	52	4
10	107185715	107185736	-	107185715	3	6	intergenic	Zm00001d025166	Zm00001d025166_T001	43808	107141907-107144555	107141907-107144555	309	protein_coding	22	2
10	107513112	107513112	-	107513112	3	3	intergenic	Zm00001d025171	Zm00001d025171_T002	3071	107516183-107521020	107516183-107521020	261	protein_coding	1	1
10	107516057	107516057	-	107516057	4	4	extended	Zm00001d025171	Zm00001d025171_T002	126	107516183-107521020	107516183-107521020	261	protein_coding	1	1
10	107516106	107516106	-	107516106	3	3	extended	Zm00001d025171	Zm00001d025171_T002	77	107516183-107521020	107516183-107521020	261	protein_coding	1	1
10	107516142	107516302	-	107516194	193	678	3UTR	Zm00001d025171	Zm00001d025171_T002	0	107516183-107521020	107516183-107521020	261	protein_coding	161	25
10	107649551	107649551	-	107649551	4	4	extended	Zm00001d025174	Zm00001d025174_T001	3	107649554-107658355	107649554-107658355	645	protein_coding	1	1
10	107649586	107649599	-	107649586	31	41	3UTR	Zm00001d025174	Zm00001d025174_T001	0	107649554-107658355	107649554-107658355	645	protein_coding	14	3
10	107649747	107649849	-	107649769	437	1702	3UTR	Zm00001d025174	Zm00001d025174_T001	0	107649554-107658355	107649554-107658355	645	protein_coding	103	30
10	107649901	107649922	-	107649903	30	38	3UTR	Zm00001d025174	Zm00001d025174_T001	0	107649554-107658355	107649554-107658355	645	protein_coding	22	3
10	107649962	107649962	-	107649962	5	5	3UTR	Zm00001d025174	Zm00001d025174_T001	0	107649554-107658355	107649554-107658355	645	protein_coding	1	1
10	107649990	107650021	-	107650017	77	112	3UTR	Zm00001d025174	Zm00001d025174_T001	0	107649554-107658355	107649554-107658355	645	protein_coding	32	9
10	107650134	107650134	-	107650134	4	4	3UTR	Zm00001d025174	Zm00001d025174_T001	0	107649554-107658355	107649554-107658355	645	protein_coding	1	1
10	107655851	107655851	-	107655851	3	3	intron	Zm00001d025174	Zm00001d025174_T001	0	107649554-107658355	107649554-107658355	645	protein_coding	1	1
10	107821849	107821849	-	107821849	3	3	intergenic	Zm00001d025178	Zm00001d025178_T001	29950	107851799-107857271	107851799-107857271	448	protein_coding	1	1
10	107821912	107821912	-	107821912	8	8	intergenic	Zm00001d025178	Zm00001d025178_T001	29887	107851799-107857271	107851799-107857271	448	protein_coding	1	1
10	107851805	107851852	-	107851852	14	41	3UTR	Zm00001d025178	Zm00001d025178_T001	0	107851799-107857271	107851799-107857271	448	protein_coding	48	7
10	107851900	107851952	-	107851924	15	91	3UTR	Zm00001d025178	Zm00001d025178_T001	0	107851799-107857271	107851799-107857271	448	protein_coding	53	10
10	107851984	107852146	-	107852012	220	792	3UTR	Zm00001d025178	Zm00001d025178_T001	0	107851799-107857271	107851799-107857271	448	protein_coding	163	34
10	107999245	107999259	-	107999245	4	8	3UTR	Zm00001d025180	Zm00001d025180_T001	0	107999211-108003428	107999211-108003428	324	protein_coding	15	2
10	107999305	107999381	-	107999348	33	100	3UTR	Zm00001d025180	Zm00001d025180_T001	0	107999211-108003428	107999211-108003428	324	protein_coding	77	12
10	107999406	107999473	-	107999443	247	729	3UTR	Zm00001d025180	Zm00001d025180_T001	0	107999211-108003428	107999211-108003428	324	protein_coding	68	14
10	107999533	107999538	-	107999538	5	8	CDS	Zm00001d025180	Zm00001d025180_T001	0	107999211-108003428	107999211-108003428	324	protein_coding	6	2
10	108126791	108126791	-	108126791	3	3	intergenic	Zm00001d025180	Zm00001d025180_T001	127580	107999211-108003428	107999211-108003428	324	protein_coding	1	1
10	108319030	108319030	-	108319030	6	6	intergenic	Zm00001d025183	Zm00001d025183_T002	43396	108275634-108280028	108275634-108280028	540	protein_coding	1	1
10	108319058	108319074	-	108319074	6	10	intergenic	Zm00001d025183	Zm00001d025183_T002	43440	108275634-108280028	108275634-108280028	540	protein_coding	17	2
10	108391329	108391329	-	108391329	8	8	intergenic	Zm00001d025186	Zm00001d025186_T001	34169	108425498-108434020	108425498-108434020	0	protein_coding	1	1
10	108514635	108514635	-	108514635	3	3	intergenic	Zm00001d025191	Zm00001d025191_T001	59930	108454705-108457901	108454705-108457901	0	protein_coding	1	1
10	108514692	108514692	-	108514692	3	3	intergenic	Zm00001d025191	Zm00001d025191_T001	59987	108454705-108457901	108454705-108457901	0	protein_coding	1	1
10	109117633	109117633	-	109117633	6	6	intergenic	Zm00001d025208	Zm00001d025208_T002	54262	109171895-109178235	109171895-109178235	114	protein_coding	1	1
10	109141827	109141827	-	109141827	3	3	intergenic	Zm00001d025208	Zm00001d025208_T002	30068	109171895-109178235	109171895-109178235	114	protein_coding	1	1
10	109171852	109171852	-	109171852	3	3	extended	Zm00001d025208	Zm00001d025208_T002	43	109171895-109178235	109171895-109178235	114	protein_coding	1	1
10	109171893	109171948	-	109171948	20	71	3UTR	Zm00001d025208	Zm00001d025208_T002	0	109171895-109178235	109171895-109178235	114	protein_coding	56	7
10	109224792	109224820	-	109224792	12	21	3UTR	Zm00001d025210	Zm00001d025210_T001	0	109224790-109231836	109224790-109231836	325	protein_coding	29	3
10	109225729	109225892	-	109225766	427	2042	intron	Zm00001d025210	Zm00001d025210_T001	0	109224790-109231836	109224790-109231836	325	protein_coding	164	45
10	109225956	109225988	-	109225956	43	66	intron	Zm00001d025210	Zm00001d025210_T001	0	109224790-109231836	109224790-109231836	325	protein_coding	33	4
10	109657924	109657935	-	109657935	11	15	extended	Zm00001d025218	Zm00001d025218_T001	41	109657976-109659501	109657976-109659501	112	protein_coding	12	2
10	109657966	109657989	-	109657989	41	66	3UTR	Zm00001d025218	Zm00001d025218_T001	0	109657976-109659501	109657976-109659501	112	protein_coding	24	5
10	109658034	109658038	-	109658038	20	24	3UTR	Zm00001d025218	Zm00001d025218_T001	0	109657976-109659501	109657976-109659501	112	protein_coding	5	2
10	110237193	110237193	-	110237193	3	3	extended	Zm00001d025233	Zm00001d025233_T001	18	110237211-110238274	110237211-110238274	197	protein_coding	1	1
10	110239064	110239064	-	110239064	10	10	intergenic	Zm00001d025233	Zm00001d025233_T001	1853	110237211-110238274	110237211-110238274	197	protein_coding	1	1
10	110239218	110239218	-	110239218	5	5	intergenic	Zm00001d025233	Zm00001d025233_T001	2007	110237211-110238274	110237211-110238274	197	protein_coding	1	1
10	110442751	110442771	-	110442762	19	50	extended	Zm00001d025236	Zm00001d025236_T001	13	110442775-110445367	110442775-110445367	342	protein_coding	21	4
10	110442820	110442820	-	110442820	30	30	3UTR	Zm00001d025236	Zm00001d025236_T001	0	110442775-110445367	110442775-110445367	342	protein_coding	1	1
10	110442861	110442866	-	110442861	5	13	3UTR	Zm00001d025236	Zm00001d025236_T001	0	110442775-110445367	110442775-110445367	342	protein_coding	6	3
10	110442910	110442910	-	110442910	6	6	3UTR	Zm00001d025236	Zm00001d025236_T001	0	110442775-110445367	110442775-110445367	342	protein_coding	1	1
10	110556146	110556146	-	110556146	7	7	intergenic	Zm00001d025239	Zm00001d025239_T001	23827	110579973-110588202	110579973-110588202	331	protein_coding	1	1
10	110579930	110579930	-	110579930	4	4	extended	Zm00001d025239	Zm00001d025239_T001	43	110579973-110588202	110579973-110588202	331	protein_coding	1	1
10	110579971	110580113	-	110580032	467	2358	3UTR	Zm00001d025239	Zm00001d025239_T001	0	110579973-110588202	110579973-110588202	331	protein_coding	143	43
10	111156794	111156823	-	111156799	13	43	extended	Zm00001d025252	Zm00001d025252_T001	139	111156938-111166083	111156938-111166083	6940	protein_coding	30	5
10	111156854	111156862	-	111156855	121	156	extended	Zm00001d025252	Zm00001d025252_T001	83	111156938-111166083	111156938-111166083	6940	protein_coding	9	5
10	111156892	111156984	-	111156934	53	203	extended	Zm00001d025252	Zm00001d025252_T001	4	111156938-111166083	111156938-111166083	6940	protein_coding	93	17
10	111157013	111157013	-	111157013	4	4	3UTR	Zm00001d025252	Zm00001d025252_T001	0	111156938-111166083	111156938-111166083	6940	protein_coding	1	1
10	111165316	111165316	-	111165316	3	3	intron	Zm00001d025252	Zm00001d025252_T001	0	111156938-111166083	111156938-111166083	6940	protein_coding	1	1
10	111165434	111165434	-	111165434	15	15	intron	Zm00001d025252	Zm00001d025252_T001	0	111156938-111166083	111156938-111166083	6940	protein_coding	1	1
10	111165501	111165507	-	111165507	9	13	intron	Zm00001d025252	Zm00001d025252_T001	0	111156938-111166083	111156938-111166083	6940	protein_coding	7	2
10	111399341	111399341	-	111399341	4	4	intergenic	Zm00001d025255	Zm00001d025255_T001	51618	111450959-111453781	111450959-111453781	0	protein_coding	1	1
10	111804073	111804123	-	111804114	14	33	intron	Zm00001d025266	Zm00001d025266_T001	0	111794975-111805082	111794975-111805082	257	protein_coding	51	6
10	111804154	111804154	-	111804154	3	3	intron	Zm00001d025266	Zm00001d025266_T001	0	111794975-111805082	111794975-111805082	257	protein_coding	1	1
10	111867617	111867617	-	111867617	13	13	3UTR	Zm00001d025268	Zm00001d025268_T001	0	111867459-111872204	111867459-111872204	668	protein_coding	1	1
10	111867643	111867643	-	111867643	3	3	3UTR	Zm00001d025268	Zm00001d025268_T001	0	111867459-111872204	111867459-111872204	668	protein_coding	1	1
10	111867713	111867826	-	111867718	57	317	3UTR	Zm00001d025268	Zm00001d025268_T001	0	111867459-111872204	111867459-111872204	668	protein_coding	114	23
10	112116850	112117117	-	112116929	326	2730	3UTR	Zm00001d025273	Zm00001d025273_T003	0	112116864-112124493	112116864-112124493	445	protein_coding	268	76
10	112122768	112122768	-	112122768	5	5	intron	Zm00001d025273	Zm00001d025273_T003	0	112116864-112124493	112116864-112124493	445	protein_coding	1	1
10	112168340	112168340	-	112168340	3	3	3UTR	Zm00001d025275	Zm00001d025275_T001	0	112168325-112188744	112168325-112188744	173	protein_coding	1	1
10	112504794	112504794	-	112504794	4	4	intergenic	Zm00001d025280	Zm00001d025280_T001	3662	112501132-112504248	112501132-112504248	0	protein_coding	1	1
10	112727197	112727197	-	112727197	5	5	extended	Zm00001d025287	Zm00001d025287_T001	383	112727580-112728092	112727580-112728092	0	protein_coding	1	1
10	112727277	112727277	-	112727277	6	6	extended	Zm00001d025287	Zm00001d025287_T001	303	112727580-112728092	112727580-112728092	0	protein_coding	1	1
10	112727311	112727384	-	112727367	93	438	extended	Zm00001d025287	Zm00001d025287_T001	213	112727580-112728092	112727580-112728092	0	protein_coding	74	27
10	112727414	112727461	-	112727444	356	586	extended	Zm00001d025287	Zm00001d025287_T001	136	112727580-112728092	112727580-112728092	0	protein_coding	48	20
10	112727499	112727502	-	112727499	12	22	extended	Zm00001d025287	Zm00001d025287_T001	81	112727580-112728092	112727580-112728092	0	protein_coding	4	3
10	113290817	113290817	-	113290817	3	3	3UTR	Zm00001d025300	Zm00001d025300_T003	0	113290815-113298776	113290809-113298776	517	protein_coding	1	1
10	113291143	113291149	-	113291143	7	11	3UTR	Zm00001d025300	Zm00001d025300_T003	0	113290815-113298776	113290809-113298776	517	protein_coding	7	2
10	113291224	113291253	-	113291240	51	102	3UTR	Zm00001d025300	Zm00001d025300_T003	0	113290815-113298776	113290809-113298776	517	protein_coding	30	5
10	113291708	113291708	-	113291708	3	3	intron	Zm00001d025300	Zm00001d025300_T003	0	113290815-113298776	113290809-113298776	517	protein_coding	1	1
10	113291757	113291757	-	113291757	5	5	intron	Zm00001d025300	Zm00001d025300_T003	0	113290815-113298776	113290809-113298776	517	protein_coding	1	1
10	113466387	113466387	-	113466387	4	4	intergenic	Zm00001d025304	Zm00001d025304_T001	4862	113471249-113475000	113471249-113475000	1528	protein_coding	1	1
10	113470501	113470508	-	113470501	7	13	intergenic	Zm00001d025304	Zm00001d025304_T001	748	113471249-113475000	113471249-113475000	1528	protein_coding	8	2
10	113470973	113470973	-	113470973	3	3	intergenic	Zm00001d025304	Zm00001d025304_T001	276	113471249-113475000	113471249-113475000	1528	protein_coding	1	1
10	113471185	113471203	-	113471203	6	10	extended	Zm00001d025304	Zm00001d025304_T001	46	113471249-113475000	113471249-113475000	1528	protein_coding	19	2
10	113471240	113471355	-	113471255	126	235	3UTR	Zm00001d025304	Zm00001d025304_T001	0	113471249-113475000	113471249-113475000	1528	protein_coding	116	13
10	113480664	113480928	-	113480729	856	4270	3UTR	Zm00001d025305	Zm00001d025305_T001	0	113480669-113484076	113480669-113484076	314	protein_coding	265	94
10	113483392	113483392	-	113483392	4	4	intron	Zm00001d025305	Zm00001d025305_T001	0	113480669-113484076	113480669-113484076	314	protein_coding	1	1
10	113605169	113605194	-	113605181	8	35	3UTR	Zm00001d025307	Zm00001d025307_T001	0	113605145-113609868	113605145-113609868	298	protein_coding	26	6
10	113838284	113838294	-	113838294	21	24	3UTR	Zm00001d025310	Zm00001d025310_T001	0	113838140-113839870	113838140-113839870	441	protein_coding	11	2
10	113838319	113838334	-	113838319	11	17	3UTR	Zm00001d025310	Zm00001d025310_T001	0	113838140-113839870	113838140-113839870	441	protein_coding	16	3
10	113916161	113916161	-	113916161	6	6	intergenic	Zm00001d025310	Zm00001d025310_T001	78021	113838140-113839870	113838140-113839870	441	protein_coding	1	1
10	114051143	114051145	-	114051143	16	20	extended	Zm00001d025322	Zm00001d025322_T001	6	114051149-114052377	114051149-114052377	486	protein_coding	3	2
10	114052781	114052781	-	114052781	8	8	extended	Zm00001d025323	Zm00001d025323_T004	61	114052842-114057299	114052762-114058481	320	protein_coding	1	1
10	114052814	114052816	-	114052816	20	23	extended	Zm00001d025323	Zm00001d025323_T004	26	114052842-114057299	114052762-114058481	320	protein_coding	3	2
10	114052842	114052842	-	114052842	8	8	3UTR	Zm00001d025323	Zm00001d025323_T004	0	114052842-114057299	114052762-114058481	320	protein_coding	1	1
10	114052870	114052870	-	114052870	9	9	3UTR	Zm00001d025323	Zm00001d025323_T004	0	114052842-114057299	114052762-114058481	320	protein_coding	1	1
10	114052903	114052903	-	114052903	18	18	3UTR	Zm00001d025323	Zm00001d025323_T004	0	114052842-114057299	114052762-114058481	320	protein_coding	1	1
10	114052950	114052950	-	114052950	5	5	3UTR	Zm00001d025323	Zm00001d025323_T004	0	114052842-114057299	114052762-114058481	320	protein_coding	1	1
10	114052975	114053012	-	114052980	215	306	3UTR	Zm00001d025323	Zm00001d025323_T004	0	114052842-114057299	114052762-114058481	320	protein_coding	38	6
10	114253908	114253908	-	114253908	6	6	intron	Zm00001d025326	Zm00001d025326_T002	0	114247285-114255287	114247261-114255287	238	protein_coding	1	1
10	114254453	114254453	-	114254453	3	3	intron	Zm00001d025326	Zm00001d025326_T002	0	114247285-114255287	114247261-114255287	238	protein_coding	1	1
10	114459772	114459772	-	114459772	3	3	intergenic	Zm00001d025331	Zm00001d025331_T002	95826	114363946-114370019	114363845-114370019	0	protein_coding	1	1
10	114698906	114698941	-	114698941	7	21	3UTR	Zm00001d025338	Zm00001d025338_T001	0	114698888-114700369	114698888-114700369	322	protein_coding	36	5
10	114699031	114699075	-	114699053	17	49	3UTR	Zm00001d025338	Zm00001d025338_T001	0	114698888-114700369	114698888-114700369	322	protein_coding	45	7
10	114701667	114701807	-	114701772	1218	3764	3UTR	Zm00001d025339	Zm00001d025339_T004	0	114701647-114705196	114701647-114705196	317	protein_coding	141	56
10	114701849	114701862	-	114701862	8	13	3UTR	Zm00001d025339	Zm00001d025339_T004	0	114701647-114705196	114701647-114705196	317	protein_coding	14	2
10	114703041	114703041	-	114703041	8	8	intron	Zm00001d025339	Zm00001d025339_T004	0	114701647-114705196	114701647-114705196	317	protein_coding	1	1
10	114734172	114734172	-	114734172	5	5	extended	Zm00001d025340	Zm00001d025340_T002	44	114734216-114741274	114734216-114741281	269	protein_coding	1	1
10	114734221	114734365	-	114734353	63	425	3UTR	Zm00001d025340	Zm00001d025340_T002	0	114734216-114741274	114734216-114741281	269	protein_coding	145	29
10	114817308	114817344	-	114817336	14	47	extended	Zm00001d025342	Zm00001d025342_T003	28	114817364-114821325	114817295-114821325	268	protein_coding	37	6
10	114817419	114817445	-	114817431	192	280	3UTR	Zm00001d025342	Zm00001d025342_T003	0	114817364-114821325	114817295-114821325	268	protein_coding	27	5
10	114817474	114817500	-	114817474	3	9	3UTR	Zm00001d025342	Zm00001d025342_T003	0	114817364-114821325	114817295-114821325	268	protein_coding	27	3
10	114817550	114817571	-	114817571	8	15	3UTR	Zm00001d025342	Zm00001d025342_T003	0	114817364-114821325	114817295-114821325	268	protein_coding	22	3
10	115002368	115002368	-	115002368	4	4	intergenic	Zm00001d025346	Zm00001d025346_T001	22699	115025067-115026953	115025067-115026953	771	protein_coding	1	1
10	115365934	115365934	-	115365934	4	4	intergenic	Zm00001d025354	Zm00001d025354_T001	121977	115243957-115246970	115243957-115246970	152	protein_coding	1	1
10	115366210	115366273	-	115366273	21	49	intergenic	Zm00001d025354	Zm00001d025354_T001	122316	115243957-115246970	115243957-115246970	152	protein_coding	64	5
10	115366301	115366307	-	115366307	8	13	intergenic	Zm00001d025354	Zm00001d025354_T001	122350	115243957-115246970	115243957-115246970	152	protein_coding	7	2
10	115366386	115366388	-	115366387	13	33	intergenic	Zm00001d025354	Zm00001d025354_T001	122430	115243957-115246970	115243957-115246970	152	protein_coding	3	3
10	115366419	115366419	-	115366419	3	3	intergenic	Zm00001d025354	Zm00001d025354_T001	122462	115243957-115246970	115243957-115246970	152	protein_coding	1	1
10	115366559	115366559	-	115366559	3	3	intergenic	Zm00001d025354	Zm00001d025354_T001	122602	115243957-115246970	115243957-115246970	152	protein_coding	1	1
10	115525745	115525750	-	115525745	12	29	extended	Zm00001d025360	Zm00001d025360_T001	294	115526039-115526965	115526039-115526965	0	protein_coding	6	3
10	115525892	115525892	-	115525892	3	3	extended	Zm00001d025360	Zm00001d025360_T001	147	115526039-115526965	115526039-115526965	0	protein_coding	1	1
10	115670797	115670797	-	115670797	3	3	intergenic	Zm00001d025363	Zm00001d025363_T001	66554	115737351-115738852	115737351-115738852	0	protein_coding	1	1
10	115750797	115750838	-	115750797	26	44	intergenic	Zm00001d025366	Zm00001d025366_T001	2075	115752872-115753270	115752872-115753270	0	protein_coding	42	4
10	115921597	115921597	-	115921597	3	3	3UTR	Zm00001d025371	Zm00001d025371_T001	0	115921553-115922847	115921553-115922847	239	protein_coding	1	1
10	115921689	115921689	-	115921689	3	3	3UTR	Zm00001d025371	Zm00001d025371_T001	0	115921553-115922847	115921553-115922847	239	protein_coding	1	1
10	115983599	115983737	-	115983629	199	693	extended	Zm00001d025373	Zm00001d025373_T001	181	115983810-115986401	115983810-115986401	0	protein_coding	139	24
10	115983782	115983782	-	115983782	4	4	extended	Zm00001d025373	Zm00001d025373_T001	28	115983810-115986401	115983810-115986401	0	protein_coding	1	1
10	116183327	116183365	-	116183365	8	20	3UTR	Zm00001d025375	Zm00001d025375_T003	0	116183302-116188328	116183302-116188328	300	protein_coding	39	4
10	116183419	116183462	-	116183430	45	136	3UTR	Zm00001d025375	Zm00001d025375_T003	0	116183302-116188328	116183302-116188328	300	protein_coding	44	9
10	116187789	116187789	-	116187789	3	3	intron	Zm00001d025375	Zm00001d025375_T003	0	116183302-116188328	116183302-116188328	300	protein_coding	1	1
10	116719065	116719073	-	116719073	44	58	intergenic	Zm00001d025389	Zm00001d025389_T001	830	116719903-116722089	116719903-116722089	148	protein_coding	9	5
10	116910280	116910280	-	116910280	18	18	extended	Zm00001d025397	Zm00001d025397_T002	1	116910281-116918062	116910281-116918062	881	protein_coding	1	1
10	116910313	116910328	-	116910323	24	45	3UTR	Zm00001d025397	Zm00001d025397_T002	0	116910281-116918062	116910281-116918062	881	protein_coding	16	5
10	116910372	116910372	-	116910372	7	7	3UTR	Zm00001d025397	Zm00001d025397_T002	0	116910281-116918062	116910281-116918062	881	protein_coding	1	1
10	116910428	116910428	-	116910428	12	12	3UTR	Zm00001d025397	Zm00001d025397_T002	0	116910281-116918062	116910281-116918062	881	protein_coding	1	1
10	116910660	116910660	-	116910660	4	4	3UTR	Zm00001d025397	Zm00001d025397_T002	0	116910281-116918062	116910281-116918062	881	protein_coding	1	1
10	116910876	116910901	-	116910894	157	230	3UTR	Zm00001d025397	Zm00001d025397_T002	0	116910281-116918062	116910281-116918062	881	protein_coding	26	6
10	116917070	116917070	-	116917070	3	3	intron	Zm00001d025397	Zm00001d025397_T002	0	116910281-116918062	116910281-116918062	881	protein_coding	1	1
10	117126722	117126934	-	117126810	5483	11688	3UTR	Zm00001d025401	Zm00001d025401_T001	0	117126777-117127673	117126777-117127673	338	protein_coding	213	78
10	117127455	117127458	-	117127457	15	22	CDS	Zm00001d025401	Zm00001d025401_T001	0	117126777-117127673	117126777-117127673	338	protein_coding	4	3
10	117256776	117256776	-	117256776	3	3	intergenic	Zm00001d023161	Zm00001d023161_T001	63608	117193168-117193554	117193168-117193554	0	lincRNA	1	1
10	117359292	117359292	-	117359292	3	3	intergenic	Zm00001d023161	Zm00001d023161_T001	166124	117193168-117193554	117193168-117193554	0	lincRNA	1	1
10	117683185	117683185	-	117683185	4	4	intergenic	Zm00001d025407	Zm00001d025407_T001	434	117683619-117686883	117683619-117686883	276	protein_coding	1	1
10	117683476	117683476	-	117683476	4	4	extended	Zm00001d025407	Zm00001d025407_T001	143	117683619-117686883	117683619-117686883	276	protein_coding	1	1
10	117683571	117683571	-	117683571	6	6	extended	Zm00001d025407	Zm00001d025407_T001	48	117683619-117686883	117683619-117686883	276	protein_coding	1	1
10	117683598	117683635	-	117683617	104	259	extended	Zm00001d025407	Zm00001d025407_T001	2	117683619-117686883	117683619-117686883	276	protein_coding	38	9
10	117683667	117683701	-	117683682	14	29	3UTR	Zm00001d025407	Zm00001d025407_T001	0	117683619-117686883	117683619-117686883	276	protein_coding	35	4
10	117683731	117683826	-	117683745	80	323	3UTR	Zm00001d025407	Zm00001d025407_T001	0	117683619-117686883	117683619-117686883	276	protein_coding	96	15
10	117737238	117737243	-	117737238	10	14	intergenic	Zm00001d025409	Zm00001d025409_T001	11081	117748319-117749080	117748319-117749080	0	protein_coding	6	2
10	117748085	117748085	-	117748085	34	34	extended	Zm00001d025409	Zm00001d025409_T001	234	117748319-117749080	117748319-117749080	0	protein_coding	1	1
10	117748147	117748203	-	117748167	7	24	extended	Zm00001d025409	Zm00001d025409_T001	152	117748319-117749080	117748319-117749080	0	protein_coding	57	5
10	117939341	117939341	-	117939341	3	3	intergenic	Zm00001d025415	Zm00001d025415_T001	2265	117937076-117938826	117937076-117938826	0	protein_coding	1	1
10	118110363	118110363	-	118110363	39	39	intergenic	Zm00001d025420	Zm00001d025420_T001	202	118110565-118111819	118110565-118111819	32	protein_coding	1	1
10	118111155	118111155	-	118111155	4	4	intron	Zm00001d025420	Zm00001d025420_T001	0	118110565-118111819	118110565-118111819	32	protein_coding	1	1
10	118293843	118293843	-	118293843	14	14	extended	Zm00001d025424	Zm00001d025424_T001	76	118293767-118293838	118293767-118293838	0	tRNA	1	1
10	118293885	118293885	-	118293885	6	6	extended	Zm00001d025425	Zm00001d025425_T001	41	118293926-118295084	118293926-118295084	304	protein_coding	1	1
10	118293913	118293926	-	118293916	4	10	extended	Zm00001d025425	Zm00001d025425_T001	10	118293926-118295084	118293926-118295084	304	protein_coding	14	3
10	118293976	118294134	-	118294010	100	728	3UTR	Zm00001d025425	Zm00001d025425_T001	0	118293926-118295084	118293926-118295084	304	protein_coding	159	38
10	118602235	118602271	-	118602247	173	304	3UTR	Zm00001d025431	Zm00001d025431_T001	0	118602247-118606546	118602247-118606546	200	protein_coding	37	6
10	118612097	118612281	-	118612160	161	868	3UTR	Zm00001d025433	Zm00001d025433_T001	0	118612121-118615983	118612121-118615983	702	protein_coding	185	32
10	118612310	118612313	-	118612313	5	9	3UTR	Zm00001d025433	Zm00001d025433_T001	0	118612121-118615983	118612121-118615983	702	protein_coding	4	2
10	118612651	118612651	-	118612651	3	3	3UTR	Zm00001d025433	Zm00001d025433_T001	0	118612121-118615983	118612121-118615983	702	protein_coding	1	1
10	118813769	118813778	-	118813778	5	8	extended	zma-MIR2118c	zma-mir2118c	164	118813614-118813746	118813614-118813746	0	miRNA	10	2
10	118814011	118814011	-	118814011	3	3	extended	zma-MIR2118c	zma-mir2118c	397	118813614-118813746	118813614-118813746	0	miRNA	1	1
10	118846940	118846954	-	118846946	7	14	3UTR	Zm00001d025445	Zm00001d025445_T001	0	118846883-118849706	118846883-118849706	325	protein_coding	15	3
10	118846980	118847094	-	118847025	41	140	3UTR	Zm00001d025445	Zm00001d025445_T001	0	118846883-118849706	118846883-118849706	325	protein_coding	115	17
10	118852715	118852715	-	118852715	9	9	extended	Zm00001d025446	Zm00001d025446_T003	33	118852748-118859926	118852748-118859926	244	protein_coding	1	1
10	118852743	118852743	-	118852743	3	3	extended	Zm00001d025446	Zm00001d025446_T003	5	118852748-118859926	118852748-118859926	244	protein_coding	1	1
10	118852806	118852830	-	118852825	136	158	3UTR	Zm00001d025446	Zm00001d025446_T003	0	118852748-118859926	118852748-118859926	244	protein_coding	25	6
10	118852873	118852873	-	118852873	3	3	3UTR	Zm00001d025446	Zm00001d025446_T003	0	118852748-118859926	118852748-118859926	244	protein_coding	1	1
10	118856317	118856362	-	118856352	4	17	5UTR	Zm00001d025446	Zm00001d025446_T003	0	118852748-118859926	118852748-118859926	244	protein_coding	46	5
10	118858160	118858160	-	118858160	4	4	5UTR	Zm00001d025446	Zm00001d025446_T003	0	118852748-118859926	118852748-118859926	244	protein_coding	1	1
10	118888344	118888344	-	118888344	3	3	extended	Zm00001d025449	Zm00001d025449_T002	110	118888454-118897515	118888454-118897515	356	protein_coding	1	1
10	118888418	118888540	-	118888511	143	366	3UTR	Zm00001d025449	Zm00001d025449_T002	0	118888454-118897515	118888454-118897515	356	protein_coding	123	22
10	118888580	118888580	-	118888580	3	3	3UTR	Zm00001d025449	Zm00001d025449_T002	0	118888454-118897515	118888454-118897515	356	protein_coding	1	1
10	118888646	118888646	-	118888646	6	6	3UTR	Zm00001d025449	Zm00001d025449_T002	0	118888454-118897515	118888454-118897515	356	protein_coding	1	1
10	118888733	118888733	-	118888733	3	3	3UTR	Zm00001d025449	Zm00001d025449_T002	0	118888454-118897515	118888454-118897515	356	protein_coding	1	1
10	119060815	119060910	-	119060828	315	614	3UTR	Zm00001d025453	Zm00001d025453_T002	0	119060827-119068182	119060827-119068182	2835	protein_coding	96	23
10	119060937	119061014	-	119060976	24	66	3UTR	Zm00001d025453	Zm00001d025453_T002	0	119060827-119068182	119060827-119068182	2835	protein_coding	78	9
10	119207638	119207638	-	119207638	4	4	3UTR	Zm00001d025460	Zm00001d025460_T002	0	119207603-119213288	119207603-119213288	389	protein_coding	1	1
10	119207698	119207700	-	119207698	6	9	3UTR	Zm00001d025460	Zm00001d025460_T002	0	119207603-119213288	119207603-119213288	389	protein_coding	3	2
10	119207759	119207786	-	119207786	13	39	3UTR	Zm00001d025460	Zm00001d025460_T002	0	119207603-119213288	119207603-119213288	389	protein_coding	28	5
10	119207811	119207883	-	119207853	25	95	3UTR	Zm00001d025460	Zm00001d025460_T002	0	119207603-119213288	119207603-119213288	389	protein_coding	73	10
10	119220677	119220677	-	119220677	3	3	extended	Zm00001d025461	Zm00001d025461_T003	121	119220798-119232248	119220775-119232248	835	protein_coding	1	1
10	119220730	119220737	-	119220730	3	6	extended	Zm00001d025461	Zm00001d025461_T003	68	119220798-119232248	119220775-119232248	835	protein_coding	8	2
10	119220769	119220820	-	119220798	107	158	3UTR	Zm00001d025461	Zm00001d025461_T003	0	119220798-119232248	119220775-119232248	835	protein_coding	52	8
10	119220848	119220851	-	119220848	4	7	3UTR	Zm00001d025461	Zm00001d025461_T003	0	119220798-119232248	119220775-119232248	835	protein_coding	4	2
10	119220935	119220951	-	119220935	5	10	3UTR	Zm00001d025461	Zm00001d025461_T003	0	119220798-119232248	119220775-119232248	835	protein_coding	17	2
10	119220983	119220986	-	119220983	5	9	3UTR	Zm00001d025461	Zm00001d025461_T003	0	119220798-119232248	119220775-119232248	835	protein_coding	4	2
10	119221073	119221118	-	119221078	192	377	3UTR	Zm00001d025461	Zm00001d025461_T003	0	119220798-119232248	119220775-119232248	835	protein_coding	46	10
10	119223884	119223884	-	119223884	3	3	intron	Zm00001d025461	Zm00001d025461_T003	0	119220798-119232248	119220775-119232248	835	protein_coding	1	1
10	119226418	119226418	-	119226418	3	3	intron	Zm00001d025461	Zm00001d025461_T003	0	119220798-119232248	119220775-119232248	835	protein_coding	1	1
10	119227057	119227057	-	119227057	3	3	intron	Zm00001d025461	Zm00001d025461_T003	0	119220798-119232248	119220775-119232248	835	protein_coding	1	1
10	119794350	119794350	-	119794350	15	15	intergenic	Zm00001d025467	Zm00001d025467_T001	30777	119825127-119826659	119825127-119826659	0	protein_coding	1	1
10	119824655	119824655	-	119824655	3	3	intergenic	Zm00001d025467	Zm00001d025467_T001	472	119825127-119826659	119825127-119826659	0	protein_coding	1	1
10	119824772	119824777	-	119824774	4	11	extended	Zm00001d025467	Zm00001d025467_T001	353	119825127-119826659	119825127-119826659	0	protein_coding	6	3
10	119824819	119824860	-	119824819	6	13	extended	Zm00001d025467	Zm00001d025467_T001	308	119825127-119826659	119825127-119826659	0	protein_coding	42	3
10	119894534	119894539	-	119894534	3	6	3UTR	Zm00001d025472	Zm00001d025472_T001	0	119894515-119896773	119894515-119896773	313	protein_coding	6	2
10	119967482	119967484	-	119967483	10	16	3UTR	Zm00001d025474	Zm00001d025474_T003	0	119967321-119981337	119967321-119981337	503	protein_coding	3	3
10	119967517	119967660	-	119967579	231	825	3UTR	Zm00001d025474	Zm00001d025474_T003	0	119967321-119981337	119967321-119981337	503	protein_coding	144	25
10	119967686	119967696	-	119967694	39	73	3UTR	Zm00001d025474	Zm00001d025474_T003	0	119967321-119981337	119967321-119981337	503	protein_coding	11	4
10	119967730	119967730	-	119967730	4	4	3UTR	Zm00001d025474	Zm00001d025474_T003	0	119967321-119981337	119967321-119981337	503	protein_coding	1	1
10	119968848	119968848	-	119968848	8	8	CDS	Zm00001d025474	Zm00001d025474_T003	0	119967321-119981337	119967321-119981337	503	protein_coding	1	1
10	119969789	119969789	-	119969789	3	3	intron	Zm00001d025474	Zm00001d025474_T003	0	119967321-119981337	119967321-119981337	503	protein_coding	1	1
10	119998670	119998670	-	119998670	3	3	intergenic	Zm00001d025475	Zm00001d025475_T001	16547	120015217-120017158	120015217-120017158	0	protein_coding	1	1
10	120015062	120015070	-	120015062	3	6	extended	Zm00001d025475	Zm00001d025475_T001	155	120015217-120017158	120015217-120017158	0	protein_coding	9	2
10	120015543	120015543	-	120015543	3	3	CDS	Zm00001d025475	Zm00001d025475_T001	0	120015217-120017158	120015217-120017158	0	protein_coding	1	1
10	120017925	120017925	-	120017925	3	3	intergenic	Zm00001d025475	Zm00001d025475_T001	2708	120015217-120017158	120015217-120017158	0	protein_coding	1	1
10	120021416	120021433	-	120021433	5	8	3UTR	Zm00001d025476	Zm00001d025476_T001	0	120021298-120023576	120021298-120023576	837	protein_coding	18	2
10	120021569	120021606	-	120021575	12	51	3UTR	Zm00001d025476	Zm00001d025476_T001	0	120021298-120023576	120021298-120023576	837	protein_coding	38	9
10	120021684	120021699	-	120021684	3	6	3UTR	Zm00001d025476	Zm00001d025476_T001	0	120021298-120023576	120021298-120023576	837	protein_coding	16	2
10	120021724	120021724	-	120021724	7	7	3UTR	Zm00001d025476	Zm00001d025476_T001	0	120021298-120023576	120021298-120023576	837	protein_coding	1	1
10	120021770	120021770	-	120021770	5	5	3UTR	Zm00001d025476	Zm00001d025476_T001	0	120021298-120023576	120021298-120023576	837	protein_coding	1	1
10	120022203	120022203	-	120022203	4	4	CDS	Zm00001d025476	Zm00001d025476_T001	0	120021298-120023576	120021298-120023576	837	protein_coding	1	1
10	120022635	120022635	-	120022635	4	4	intron	Zm00001d025476	Zm00001d025476_T001	0	120021298-120023576	120021298-120023576	837	protein_coding	1	1
10	120107881	120107913	-	120107913	23	55	3UTR	Zm00001d025480	Zm00001d025480_T001	0	120107897-120111131	120107897-120111131	257	protein_coding	33	6
10	120154573	120154573	-	120154573	3	3	intergenic	Zm00001d025482	Zm00001d025482_T001	22703	120131870-120132917	120131870-120132917	362	protein_coding	1	1
10	120193772	120193773	-	120193773	5	8	intergenic	Zm00001d025483	Zm00001d025483_T001	357	120194130-120195766	120194130-120195766	212	protein_coding	2	2
10	120230754	120230754	-	120230754	3	3	intergenic	Zm00001d025484	Zm00001d025484_T002	8583	120222171-120229249	120222171-120229249	2578	protein_coding	1	1
10	120429741	120429741	-	120429741	4	4	extended	Zm00001d025490	Zm00001d025490_T001	204	120429945-120430385	120429945-120430385	0	protein_coding	1	1
10	120429772	120429772	-	120429772	4	4	extended	Zm00001d025490	Zm00001d025490_T001	173	120429945-120430385	120429945-120430385	0	protein_coding	1	1
10	120773395	120773395	-	120773395	7	7	intergenic	Zm00001d025507	Zm00001d025507_T010	22251	120795646-120808976	120795646-120808976	215	protein_coding	1	1
10	120876056	120876074	-	120876060	216	514	extended	Zm00001d025509	Zm00001d025509_T001	1	120876061-120876869	120876061-120876869	232	protein_coding	19	13
10	120876099	120876218	-	120876171	2747	6742	3UTR	Zm00001d025509	Zm00001d025509_T001	0	120876061-120876869	120876061-120876869	232	protein_coding	120	53
10	120968587	120968587	-	120968587	3	3	intergenic	Zm00001d025514	Zm00001d025514_T001	498	120969085-120970263	120969085-120970263	0	protein_coding	1	1
10	120968912	120969053	-	120969027	148	495	extended	Zm00001d025514	Zm00001d025514_T001	58	120969085-120970263	120969085-120970263	0	protein_coding	142	26
10	121027329	121027330	-	121027329	4	7	intergenic	Zm00001d025518	Zm00001d025518_T001	6292	121033621-121033953	121033621-121033953	0	protein_coding	2	2
10	121027422	121027422	-	121027422	5	5	intergenic	Zm00001d025518	Zm00001d025518_T001	6199	121033621-121033953	121033621-121033953	0	protein_coding	1	1
10	121059279	121059279	-	121059279	4	4	intergenic	Zm00001d025520	Zm00001d025520_T001	23123	121082402-121084106	121082402-121084106	0	protein_coding	1	1
10	121063522	121063522	-	121063522	9	9	intergenic	Zm00001d025520	Zm00001d025520_T001	18880	121082402-121084106	121082402-121084106	0	protein_coding	1	1
10	121064506	121064520	-	121064520	8	11	intergenic	Zm00001d025520	Zm00001d025520_T001	17882	121082402-121084106	121082402-121084106	0	protein_coding	15	2
10	121274384	121274397	-	121274384	3	9	intergenic	Zm00001d025520	Zm00001d025520_T001	191982	121082402-121084106	121082402-121084106	0	protein_coding	14	3
10	121274637	121274664	-	121274638	6	18	intergenic	Zm00001d025520	Zm00001d025520_T001	192236	121082402-121084106	121082402-121084106	0	protein_coding	28	4
10	121274691	121274691	-	121274691	18	18	intergenic	Zm00001d025520	Zm00001d025520_T001	192289	121082402-121084106	121082402-121084106	0	protein_coding	1	1
10	121759810	121759810	-	121759810	3	3	intergenic	Zm00001d025542	Zm00001d025542_T002	775	121760585-121762717	121760585-121762717	152	protein_coding	1	1
10	121759839	121759847	-	121759839	3	6	intergenic	Zm00001d025542	Zm00001d025542_T002	746	121760585-121762717	121760585-121762717	152	protein_coding	9	2
10	121759927	121759927	-	121759927	3	3	intergenic	Zm00001d025542	Zm00001d025542_T002	658	121760585-121762717	121760585-121762717	152	protein_coding	1	1
10	121760273	121760273	-	121760273	9	9	intergenic	Zm00001d025542	Zm00001d025542_T002	312	121760585-121762717	121760585-121762717	152	protein_coding	1	1
10	121760317	121760383	-	121760359	61	123	intergenic	Zm00001d025542	Zm00001d025542_T002	226	121760585-121762717	121760585-121762717	152	protein_coding	67	10
10	121760420	121760420	-	121760420	3	3	intergenic	Zm00001d025542	Zm00001d025542_T002	165	121760585-121762717	121760585-121762717	152	protein_coding	1	1
10	121760528	121760528	-	121760528	3	3	extended	Zm00001d025542	Zm00001d025542_T002	57	121760585-121762717	121760585-121762717	152	protein_coding	1	1
10	121760556	121760680	-	121760590	331	1042	3UTR	Zm00001d025542	Zm00001d025542_T002	0	121760585-121762717	121760585-121762717	152	protein_coding	125	36
10	121761593	121761593	-	121761593	3	3	intron	Zm00001d025542	Zm00001d025542_T002	0	121760585-121762717	121760585-121762717	152	protein_coding	1	1
10	121886006	121886006	-	121886006	7	7	3UTR	Zm00001d025547	Zm00001d025547_T001	0	121886003-121888304	121886003-121888304	332	protein_coding	1	1
10	121886034	121886034	-	121886034	3	3	3UTR	Zm00001d025547	Zm00001d025547_T001	0	121886003-121888304	121886003-121888304	332	protein_coding	1	1
10	121886121	121886121	-	121886121	6	6	3UTR	Zm00001d025547	Zm00001d025547_T001	0	121886003-121888304	121886003-121888304	332	protein_coding	1	1
10	121886229	121886229	-	121886229	3	3	3UTR	Zm00001d025547	Zm00001d025547_T001	0	121886003-121888304	121886003-121888304	332	protein_coding	1	1
10	121921886	121921997	-	121921922	388	1012	3UTR	Zm00001d025548	Zm00001d025548_T001	0	121921907-121926936	121921907-121926936	498	protein_coding	112	20
10	121922230	121922230	-	121922230	3	3	3UTR	Zm00001d025548	Zm00001d025548_T001	0	121921907-121926936	121921907-121926936	498	protein_coding	1	1
10	121925770	121925770	-	121925770	4	4	intron	Zm00001d025548	Zm00001d025548_T001	0	121921907-121926936	121921907-121926936	498	protein_coding	1	1
10	122405755	122405769	-	122405755	30	55	3UTR	Zm00001d025564	Zm00001d025564_T001	0	122405745-122406727	122405745-122406727	164	protein_coding	15	5
10	122514903	122514903	-	122514903	5	5	extended	Zm00001d025567	Zm00001d025567_T001	264	122515167-122515565	122515167-122515565	0	protein_coding	1	1
10	122514978	122515000	-	122514985	16	65	extended	Zm00001d025567	Zm00001d025567_T001	182	122515167-122515565	122515167-122515565	0	protein_coding	23	7
10	122547636	122547669	-	122547656	201	273	extended	Zm00001d025568	Zm00001d025568_T001	96	122547752-122549122	122547752-122549122	0	protein_coding	34	8
10	122602738	122602930	-	122602850	38	318	3UTR	Zm00001d025570	Zm00001d025570_T003	0	122602824-122612949	122602824-122612949	272	protein_coding	193	28
10	122602983	122603016	-	122602991	11	51	3UTR	Zm00001d025570	Zm00001d025570_T003	0	122602824-122612949	122602824-122612949	272	protein_coding	34	9
10	122641922	122641922	-	122641922	3	3	3UTR	Zm00001d025572	Zm00001d025572_T001	0	122641857-122645133	122641857-122645133	241	protein_coding	1	1
10	122708857	122708857	-	122708857	4	4	extended	Zm00001d025573	Zm00001d025573_T001	8	122708865-122710678	122708865-122710678	120	protein_coding	1	1
10	122794377	122794377	-	122794377	4	4	intergenic	Zm00001d025575	Zm00001d025575_T003	27337	122821714-122833327	122821714-122833327	391	protein_coding	1	1
10	122821579	122821595	-	122821579	4	8	extended	Zm00001d025575	Zm00001d025575_T003	135	122821714-122833327	122821714-122833327	391	protein_coding	17	2
10	122821629	122821629	-	122821629	3	3	extended	Zm00001d025575	Zm00001d025575_T003	85	122821714-122833327	122821714-122833327	391	protein_coding	1	1
10	122821658	122821734	-	122821695	112	481	extended	Zm00001d025575	Zm00001d025575_T003	19	122821714-122833327	122821714-122833327	391	protein_coding	77	20
10	122821791	122821939	-	122821849	701	1612	3UTR	Zm00001d025575	Zm00001d025575_T003	0	122821714-122833327	122821714-122833327	391	protein_coding	149	34
10	122826910	122826910	-	122826910	3	3	intron	Zm00001d025575	Zm00001d025575_T003	0	122821714-122833327	122821714-122833327	391	protein_coding	1	1
10	122850686	122850689	-	122850687	13	27	extended	Zm00001d025578	Zm00001d025578_T001	35	122850722-122850793	122850722-122850793	0	tRNA	4	4
10	122855592	122855631	-	122855608	109	221	3UTR	Zm00001d025580	Zm00001d025580_T001	0	122855595-122861043	122855595-122861043	202	protein_coding	40	7
10	122855668	122855668	-	122855668	3	3	3UTR	Zm00001d025580	Zm00001d025580_T001	0	122855595-122861043	122855595-122861043	202	protein_coding	1	1
10	122860354	122860354	-	122860354	4	4	intron	Zm00001d025580	Zm00001d025580_T001	0	122855595-122861043	122855595-122861043	202	protein_coding	1	1
10	123296543	123296543	-	123296543	5	5	intergenic	Zm00001d025587	Zm00001d025587_T001	845	123297388-123299277	123297388-123299277	160	protein_coding	1	1
10	123297286	123297287	-	123297287	4	7	extended	Zm00001d025587	Zm00001d025587_T001	101	123297388-123299277	123297388-123299277	160	protein_coding	2	2
10	123297342	123297471	-	123297396	146	776	3UTR	Zm00001d025587	Zm00001d025587_T001	0	123297388-123299277	123297388-123299277	160	protein_coding	130	30
10	123297711	123297711	-	123297711	3	3	intron	Zm00001d025587	Zm00001d025587_T001	0	123297388-123299277	123297388-123299277	160	protein_coding	1	1
10	123300081	123300216	-	123300084	238	1156	3UTR	Zm00001d025588	Zm00001d025588_T001	0	123299914-123302153	123299914-123302351	425	protein_coding	136	51
10	123321324	123321324	-	123321324	7	7	extended	Zm00001d025590	Zm00001d025590_T001	38	123321362-123327947	123321362-123328119	552	protein_coding	1	1
10	123321377	123321377	-	123321377	5	5	3UTR	Zm00001d025590	Zm00001d025590_T001	0	123321362-123327947	123321362-123328119	552	protein_coding	1	1
10	123321523	123321615	-	123321585	32	199	3UTR	Zm00001d025590	Zm00001d025590_T001	0	123321362-123327947	123321362-123328119	552	protein_coding	93	13
10	123321645	123321727	-	123321689	9	53	3UTR	Zm00001d025590	Zm00001d025590_T001	0	123321362-123327947	123321362-123328119	552	protein_coding	83	12
10	123321752	123321784	-	123321757	51	75	3UTR	Zm00001d025590	Zm00001d025590_T001	0	123321362-123327947	123321362-123328119	552	protein_coding	33	6
10	123896697	123896786	-	123896713	118	284	intergenic	Zm00001d025614	Zm00001d025614_T001	14530	123911243-123912298	123911243-123912298	0	protein_coding	90	16
10	123896811	123896828	-	123896828	12	23	intergenic	Zm00001d025614	Zm00001d025614_T001	14415	123911243-123912298	123911243-123912298	0	protein_coding	18	2
10	123910795	123910795	-	123910795	3	3	extended	Zm00001d025614	Zm00001d025614_T001	448	123911243-123912298	123911243-123912298	0	protein_coding	1	1
10	123910859	123910864	-	123910859	6	10	extended	Zm00001d025614	Zm00001d025614_T001	384	123911243-123912298	123911243-123912298	0	protein_coding	6	2
10	123910900	123910983	-	123910900	25	69	extended	Zm00001d025614	Zm00001d025614_T001	343	123911243-123912298	123911243-123912298	0	protein_coding	84	10
10	123911019	123911036	-	123911019	34	57	extended	Zm00001d025614	Zm00001d025614_T001	224	123911243-123912298	123911243-123912298	0	protein_coding	18	5
10	123911063	123911148	-	123911087	1049	1855	extended	Zm00001d025614	Zm00001d025614_T001	156	123911243-123912298	123911243-123912298	0	protein_coding	86	29
10	123911173	123911194	-	123911173	8	16	extended	Zm00001d025614	Zm00001d025614_T001	70	123911243-123912298	123911243-123912298	0	protein_coding	22	3
10	124227166	124227166	-	124227166	6	6	intergenic	Zm00001d025619	Zm00001d025619_T001	596	124227762-124229007	124227762-124229007	265	protein_coding	1	1
10	124227686	124227757	-	124227717	25	95	extended	Zm00001d025619	Zm00001d025619_T001	45	124227762-124229007	124227762-124229007	265	protein_coding	72	9
10	124227785	124227967	-	124227908	1689	4780	3UTR	Zm00001d025619	Zm00001d025619_T001	0	124227762-124229007	124227762-124229007	265	protein_coding	183	68
10	124228013	124228029	-	124228013	7	11	3UTR	Zm00001d025619	Zm00001d025619_T001	0	124227762-124229007	124227762-124229007	265	protein_coding	17	2
10	124266686	124266786	-	124266711	596	1329	3UTR	Zm00001d025623	Zm00001d025623_T002	0	124266701-124269223	124266698-124269223	237	protein_coding	101	21
10	124266813	124266833	-	124266813	11	20	3UTR	Zm00001d025623	Zm00001d025623_T002	0	124266701-124269223	124266698-124269223	237	protein_coding	21	3
10	124266860	124266872	-	124266872	7	16	3UTR	Zm00001d025623	Zm00001d025623_T002	0	124266701-124269223	124266698-124269223	237	protein_coding	13	3
10	124268743	124268743	-	124268743	10	10	5UTR	Zm00001d025623	Zm00001d025623_T002	0	124266701-124269223	124266698-124269223	237	protein_coding	1	1
10	124405388	124405418	-	124405418	48	87	intergenic	Zm00001d025625	Zm00001d025625_T001	1837	124407255-124409576	124407255-124409576	0	protein_coding	31	5
10	124406745	124406745	-	124406745	3	3	intergenic	Zm00001d025625	Zm00001d025625_T001	510	124407255-124409576	124407255-124409576	0	protein_coding	1	1
10	124409853	124409894	-	124409891	2886	3883	3UTR	Zm00001d025626	Zm00001d025626_T003	0	124409879-124415115	124409879-124415115	286	protein_coding	42	18
10	124409925	124409981	-	124409944	74	235	3UTR	Zm00001d025626	Zm00001d025626_T003	0	124409879-124415115	124409879-124415115	286	protein_coding	57	14
10	124410028	124410073	-	124410053	134	178	3UTR	Zm00001d025626	Zm00001d025626_T003	0	124409879-124415115	124409879-124415115	286	protein_coding	46	6
10	124414177	124414177	-	124414177	3	3	intron	Zm00001d025626	Zm00001d025626_T003	0	124409879-124415115	124409879-124415115	286	protein_coding	1	1
10	124522349	124522373	-	124522360	4	10	intergenic	Zm00001d025629	Zm00001d025629_T002	99903	124622263-124638488	124622263-124638536	800	protein_coding	25	3
10	124522441	124522553	-	124522510	91	520	intergenic	Zm00001d025629	Zm00001d025629_T002	99753	124622263-124638488	124622263-124638536	800	protein_coding	113	33
10	124522648	124522648	-	124522648	6	6	intergenic	Zm00001d025629	Zm00001d025629_T002	99615	124622263-124638488	124622263-124638536	800	protein_coding	1	1
10	124760767	124760767	-	124760767	3	3	intergenic	Zm00001d025640	Zm00001d025640_T001	182	124760949-124764322	124760949-124764322	718	protein_coding	1	1
10	124776376	124776382	-	124776376	4	7	intergenic	Zm00001d025640	Zm00001d025640_T001	15427	124760949-124764322	124760949-124764322	718	protein_coding	7	2
10	124896393	124896393	-	124896393	3	3	intergenic	Zm00001d025647	Zm00001d025647_T001	1198	124897591-124901710	124897591-124901710	0	protein_coding	1	1
10	124926861	124926861	-	124926861	3	3	intergenic	Zm00001d025650	Zm00001d025650_T001	522	124927383-124928855	124927383-124928855	0	protein_coding	1	1
10	124927251	124927255	-	124927255	4	7	extended	Zm00001d025650	Zm00001d025650_T001	128	124927383-124928855	124927383-124928855	0	protein_coding	5	2
10	124927312	124927312	-	124927312	3	3	extended	Zm00001d025650	Zm00001d025650_T001	71	124927383-124928855	124927383-124928855	0	protein_coding	1	1
10	125013203	125013252	-	125013252	22	63	3UTR	Zm00001d025651	Zm00001d025651_T001	0	125013169-125020527	125013169-125020527	431	protein_coding	50	7
10	125013305	125013364	-	125013341	45	184	3UTR	Zm00001d025651	Zm00001d025651_T001	0	125013169-125020527	125013169-125020527	431	protein_coding	60	15
10	125013411	125013555	-	125013529	76	355	3UTR	Zm00001d025651	Zm00001d025651_T001	0	125013169-125020527	125013169-125020527	431	protein_coding	145	27
10	125013614	125013614	-	125013614	7	7	CDS	Zm00001d025651	Zm00001d025651_T001	0	125013169-125020527	125013169-125020527	431	protein_coding	1	1
10	125019829	125019830	-	125019830	4	7	intron	Zm00001d025651	Zm00001d025651_T001	0	125013169-125020527	125013169-125020527	431	protein_coding	2	2
10	125102930	125103042	-	125103028	141	588	3UTR	Zm00001d025652	Zm00001d025652_T004	0	125102976-125107740	125102974-125107740	258	protein_coding	113	19
10	125107937	125108106	-	125108068	830	2687	3UTR	Zm00001d025653	Zm00001d025653_T002	0	125107974-125113328	125107974-125113328	1114	protein_coding	170	58
10	125108131	125108328	-	125108157	103	790	3UTR	Zm00001d025653	Zm00001d025653_T002	0	125107974-125113328	125107974-125113328	1114	protein_coding	198	40
10	125109688	125109688	-	125109688	4	4	intron	Zm00001d025653	Zm00001d025653_T002	0	125107974-125113328	125107974-125113328	1114	protein_coding	1	1
10	125206467	125206467	-	125206467	7	7	extended	Zm00001d025656	Zm00001d025656_T001	405	125206872-125209697	125206872-125209697	0	protein_coding	1	1
10	125206536	125206541	-	125206536	7	10	extended	Zm00001d025656	Zm00001d025656_T001	336	125206872-125209697	125206872-125209697	0	protein_coding	6	2
10	125206625	125206629	-	125206629	13	17	extended	Zm00001d025656	Zm00001d025656_T001	243	125206872-125209697	125206872-125209697	0	protein_coding	5	2
10	125210842	125210848	-	125210848	10	14	intergenic	Zm00001d025657	Zm00001d025657_T003	155	125211003-125215696	125211002-125215696	1543	protein_coding	7	2
10	125210879	125210879	-	125210879	11	11	extended	Zm00001d025657	Zm00001d025657_T003	124	125211003-125215696	125211002-125215696	1543	protein_coding	1	1
10	125210965	125210965	-	125210965	3	3	extended	Zm00001d025657	Zm00001d025657_T003	38	125211003-125215696	125211002-125215696	1543	protein_coding	1	1
10	125211000	125211288	-	125211108	79	393	3UTR	Zm00001d025657	Zm00001d025657_T003	0	125211003-125215696	125211002-125215696	1543	protein_coding	289	33
10	125211324	125211324	-	125211324	3	3	3UTR	Zm00001d025657	Zm00001d025657_T003	0	125211003-125215696	125211002-125215696	1543	protein_coding	1	1
10	125214750	125214750	-	125214750	3	3	intron	Zm00001d025657	Zm00001d025657_T003	0	125211003-125215696	125211002-125215696	1543	protein_coding	1	1
10	125214859	125214859	-	125214859	3	3	intron	Zm00001d025657	Zm00001d025657_T003	0	125211003-125215696	125211002-125215696	1543	protein_coding	1	1
10	125254611	125254734	-	125254703	66	285	3UTR	Zm00001d025658	Zm00001d025658_T002	0	125254612-125261724	125254612-125261724	458	protein_coding	124	17
10	125254773	125254807	-	125254807	12	37	3UTR	Zm00001d025658	Zm00001d025658_T002	0	125254612-125261724	125254612-125261724	458	protein_coding	35	6
10	125254838	125254857	-	125254838	11	23	3UTR	Zm00001d025658	Zm00001d025658_T002	0	125254612-125261724	125254612-125261724	458	protein_coding	20	3
10	125254896	125254920	-	125254915	42	89	3UTR	Zm00001d025658	Zm00001d025658_T002	0	125254612-125261724	125254612-125261724	458	protein_coding	25	6
10	125277430	125277430	-	125277430	3	3	intergenic	Zm00001d025659	Zm00001d025659_T001	178	125277608-125279663	125277608-125279663	215	protein_coding	1	1
10	125277544	125277548	-	125277546	24	30	extended	Zm00001d025659	Zm00001d025659_T001	62	125277608-125279663	125277608-125279663	215	protein_coding	5	3
10	125277598	125277686	-	125277613	200	510	3UTR	Zm00001d025659	Zm00001d025659_T001	0	125277608-125279663	125277608-125279663	215	protein_coding	89	20
10	125277712	125277716	-	125277712	17	31	3UTR	Zm00001d025659	Zm00001d025659_T001	0	125277608-125279663	125277608-125279663	215	protein_coding	5	3
10	125277761	125277838	-	125277817	14	54	3UTR	Zm00001d025659	Zm00001d025659_T001	0	125277608-125279663	125277608-125279663	215	protein_coding	78	9
10	125277935	125277937	-	125277937	6	9	CDS	Zm00001d025659	Zm00001d025659_T001	0	125277608-125279663	125277608-125279663	215	protein_coding	3	2
10	125278042	125278071	-	125278042	9	15	CDS	Zm00001d025659	Zm00001d025659_T001	0	125277608-125279663	125277608-125279663	215	protein_coding	30	3
10	125342311	125342311	-	125342311	3	3	intergenic	Zm00001d025662	Zm00001d025662_T001	20479	125362790-125363050	125362790-125363050	0	protein_coding	1	1
10	125364067	125364112	-	125364091	17	35	3UTR	Zm00001d025663	Zm00001d025663_T003	0	125363945-125369623	125363945-125369623	1807	protein_coding	46	5
10	125364170	125364190	-	125364170	5	8	3UTR	Zm00001d025663	Zm00001d025663_T003	0	125363945-125369623	125363945-125369623	1807	protein_coding	21	2
10	125364223	125364353	-	125364279	77	445	3UTR	Zm00001d025663	Zm00001d025663_T003	0	125363945-125369623	125363945-125369623	1807	protein_coding	131	29
10	125364411	125364482	-	125364439	344	527	3UTR	Zm00001d025663	Zm00001d025663_T003	0	125363945-125369623	125363945-125369623	1807	protein_coding	72	16
10	125366834	125366834	-	125366834	4	4	3UTR	Zm00001d025663	Zm00001d025663_T003	0	125363945-125369623	125363945-125369623	1807	protein_coding	1	1
10	125366888	125367044	-	125366981	723	1404	3UTR	Zm00001d025663	Zm00001d025663_T003	0	125363945-125369623	125363945-125369623	1807	protein_coding	157	26
10	125367072	125367072	-	125367072	3	3	3UTR	Zm00001d025663	Zm00001d025663_T003	0	125363945-125369623	125363945-125369623	1807	protein_coding	1	1
10	125367750	125367750	-	125367750	4	4	CDS	Zm00001d025663	Zm00001d025663_T003	0	125363945-125369623	125363945-125369623	1807	protein_coding	1	1
10	125367777	125367777	-	125367777	3	3	intron	Zm00001d025663	Zm00001d025663_T003	0	125363945-125369623	125363945-125369623	1807	protein_coding	1	1
10	125369869	125369869	-	125369869	9	9	3UTR	Zm00001d025664	Zm00001d025664_T001	0	125369798-125371471	125369798-125371471	342	protein_coding	1	1
10	125373182	125373244	-	125373241	42	133	3UTR	Zm00001d025665	Zm00001d025665_T002	0	125373155-125379315	125373155-125379315	305	protein_coding	63	12
10	125373269	125373307	-	125373305	63	157	3UTR	Zm00001d025665	Zm00001d025665_T002	0	125373155-125379315	125373155-125379315	305	protein_coding	39	7
10	125373383	125373383	-	125373383	4	4	3UTR	Zm00001d025665	Zm00001d025665_T002	0	125373155-125379315	125373155-125379315	305	protein_coding	1	1
10	125375231	125375231	-	125375231	5	5	CDS	Zm00001d025665	Zm00001d025665_T002	0	125373155-125379315	125373155-125379315	305	protein_coding	1	1
10	125377867	125377867	-	125377867	3	3	intron	Zm00001d025665	Zm00001d025665_T002	0	125373155-125379315	125373155-125379315	305	protein_coding	1	1
10	125382420	125382420	-	125382420	5	5	intergenic	Zm00001d025665	Zm00001d025665_T002	9265	125373155-125379315	125373155-125379315	305	protein_coding	1	1
10	125488381	125488484	-	125488454	81	324	3UTR	Zm00001d025667	Zm00001d025667_T001	0	125488390-125491008	125488390-125491008	326	protein_coding	104	16
10	125488512	125488519	-	125488517	17	38	3UTR	Zm00001d025667	Zm00001d025667_T001	0	125488390-125491008	125488390-125491008	326	protein_coding	8	3
10	125488544	125488544	-	125488544	12	12	3UTR	Zm00001d025667	Zm00001d025667_T001	0	125488390-125491008	125488390-125491008	326	protein_coding	1	1
10	125488595	125488664	-	125488641	12	40	3UTR	Zm00001d025667	Zm00001d025667_T001	0	125488390-125491008	125488390-125491008	326	protein_coding	70	7
10	125572920	125572945	-	125572938	90	162	3UTR	Zm00001d025668	Zm00001d025668_T002	0	125572844-125579987	125572844-125579987	425	protein_coding	26	9
10	125572982	125573014	-	125573014	15	36	3UTR	Zm00001d025668	Zm00001d025668_T002	0	125572844-125579987	125572844-125579987	425	protein_coding	33	4
10	125573090	125573090	-	125573090	5	5	3UTR	Zm00001d025668	Zm00001d025668_T002	0	125572844-125579987	125572844-125579987	425	protein_coding	1	1
10	125573128	125573129	-	125573128	7	13	3UTR	Zm00001d025668	Zm00001d025668_T002	0	125572844-125579987	125572844-125579987	425	protein_coding	2	2
10	125578498	125578498	-	125578498	4	4	intron	Zm00001d025668	Zm00001d025668_T002	0	125572844-125579987	125572844-125579987	425	protein_coding	1	1
10	125756409	125756409	-	125756409	3	3	extended	Zm00001d025669	Zm00001d025669_T002	43	125756452-125761608	125756452-125761608	279	protein_coding	1	1
10	125756438	125756438	-	125756438	21	21	extended	Zm00001d025669	Zm00001d025669_T002	14	125756452-125761608	125756452-125761608	279	protein_coding	1	1
10	125756465	125756465	-	125756465	15	15	3UTR	Zm00001d025669	Zm00001d025669_T002	0	125756452-125761608	125756452-125761608	279	protein_coding	1	1
10	125756490	125756551	-	125756520	55	111	3UTR	Zm00001d025669	Zm00001d025669_T002	0	125756452-125761608	125756452-125761608	279	protein_coding	62	13
10	125786150	125786150	-	125786150	6	6	intergenic	Zm00001d025670	Zm00001d025670_T001	1515	125787665-125792972	125787665-125792972	2397	protein_coding	1	1
10	125787649	125787672	-	125787672	6	12	3UTR	Zm00001d025670	Zm00001d025670_T001	0	125787665-125792972	125787665-125792972	2397	protein_coding	24	3
10	125787704	125787704	-	125787704	3	3	3UTR	Zm00001d025670	Zm00001d025670_T001	0	125787665-125792972	125787665-125792972	2397	protein_coding	1	1
10	125787788	125787830	-	125787805	12	29	3UTR	Zm00001d025670	Zm00001d025670_T001	0	125787665-125792972	125787665-125792972	2397	protein_coding	43	4
10	125986614	125986614	-	125986614	3	3	intergenic	Zm00001d025675	Zm00001d025675_T001	12599	125999213-126000706	125999213-126000706	0	protein_coding	1	1
10	125989231	125989231	-	125989231	4	4	intergenic	Zm00001d025675	Zm00001d025675_T001	9982	125999213-126000706	125999213-126000706	0	protein_coding	1	1
10	125997890	125997890	-	125997890	5	5	intergenic	Zm00001d025675	Zm00001d025675_T001	1323	125999213-126000706	125999213-126000706	0	protein_coding	1	1
10	125998837	125998972	-	125998940	83	466	extended	Zm00001d025675	Zm00001d025675_T001	273	125999213-126000706	125999213-126000706	0	protein_coding	136	25
10	125999022	125999032	-	125999032	18	24	extended	Zm00001d025675	Zm00001d025675_T001	181	125999213-126000706	125999213-126000706	0	protein_coding	11	3
10	126092302	126092302	-	126092302	4	4	intergenic	Zm00001d025677	Zm00001d025677_T001	65071	126027231-126028126	126027231-126028126	0	protein_coding	1	1
10	126185654	126185654	-	126185654	3	3	extended	Zm00001d025684	Zm00001d025684_T001	349	126186003-126189175	126186003-126189175	0	protein_coding	1	1
10	126185771	126185814	-	126185792	8	30	extended	Zm00001d025684	Zm00001d025684_T001	211	126186003-126189175	126186003-126189175	0	protein_coding	44	5
10	126191630	126191630	-	126191630	3	3	intergenic	Zm00001d025684	Zm00001d025684_T001	5627	126186003-126189175	126186003-126189175	0	protein_coding	1	1
10	126290985	126290985	-	126290985	10	10	extended	Zm00001d025689	Zm00001d025689_T003	78	126291063-126294862	126291063-126294862	217	protein_coding	1	1
10	126291020	126291070	-	126291069	275	346	3UTR	Zm00001d025689	Zm00001d025689_T003	0	126291063-126294862	126291063-126294862	217	protein_coding	51	11
10	126291120	126291205	-	126291123	50	234	3UTR	Zm00001d025689	Zm00001d025689_T003	0	126291063-126294862	126291063-126294862	217	protein_coding	86	16
10	126292619	126292619	-	126292619	3	3	intron	Zm00001d025689	Zm00001d025689_T003	0	126291063-126294862	126291063-126294862	217	protein_coding	1	1
10	126319931	126319931	-	126319931	3	3	3UTR	Zm00001d025690	Zm00001d025690_T002	0	126319920-126323617	126319920-126323617	356	protein_coding	1	1
10	126319981	126320088	-	126320072	446	622	3UTR	Zm00001d025690	Zm00001d025690_T002	0	126319920-126323617	126319920-126323617	356	protein_coding	108	17
10	126320120	126320218	-	126320170	178	348	intron	Zm00001d025690	Zm00001d025690_T002	0	126319920-126323617	126319920-126323617	356	protein_coding	99	18
10	126320255	126320260	-	126320255	5	8	3UTR	Zm00001d025690	Zm00001d025690_T002	0	126319920-126323617	126319920-126323617	356	protein_coding	6	2
10	126320308	126320316	-	126320308	4	7	3UTR	Zm00001d025690	Zm00001d025690_T002	0	126319920-126323617	126319920-126323617	356	protein_coding	9	2
10	126530134	126530144	-	126530134	9	18	extended	Zm00001d025695	Zm00001d025695_T001	24	126530158-126532242	126530158-126532242	0	protein_coding	11	3
10	126530185	126530185	-	126530185	3	3	CDS	Zm00001d025695	Zm00001d025695_T001	0	126530158-126532242	126530158-126532242	0	protein_coding	1	1
10	126536055	126536055	-	126536055	3	3	intergenic	Zm00001d025695	Zm00001d025695_T001	5897	126530158-126532242	126530158-126532242	0	protein_coding	1	1
10	126536162	126536197	-	126536166	19	36	intergenic	Zm00001d025695	Zm00001d025695_T001	6008	126530158-126532242	126530158-126532242	0	protein_coding	36	6
10	126536231	126536231	-	126536231	5	5	intergenic	Zm00001d025695	Zm00001d025695_T001	6073	126530158-126532242	126530158-126532242	0	protein_coding	1	1
10	126625049	126625058	-	126625049	24	32	intergenic	Zm00001d025697	Zm00001d025697_T002	23823	126601226-126609111	126601226-126609111	396	protein_coding	10	2
10	126625929	126625929	-	126625929	7	7	intergenic	Zm00001d025697	Zm00001d025697_T002	24703	126601226-126609111	126601226-126609111	396	protein_coding	1	1
10	126793983	126794007	-	126794007	4	7	extended	Zm00001d025704	Zm00001d025704_T001	129	126794136-126795161	126794136-126795161	0	protein_coding	25	2
10	126856803	126856803	-	126856803	10	10	extended	Zm00001d025705	Zm00001d025705_T004	2	126856805-126878792	126856805-126878792	420	protein_coding	1	1
10	126856847	126856885	-	126856882	145	356	3UTR	Zm00001d025705	Zm00001d025705_T004	0	126856805-126878792	126856805-126878792	420	protein_coding	39	12
10	126856927	126856970	-	126856962	22	96	3UTR	Zm00001d025705	Zm00001d025705_T004	0	126856805-126878792	126856805-126878792	420	protein_coding	44	11
10	126880548	126880568	-	126880548	8	11	extended	Zm00001d025706	Zm00001d025706_T003	1	126880549-126888834	126880549-126888843	1854	protein_coding	21	2
10	126880607	126880626	-	126880626	5	8	3UTR	Zm00001d025706	Zm00001d025706_T003	0	126880549-126888834	126880549-126888843	1854	protein_coding	20	2
10	126880665	126880665	-	126880665	5	5	3UTR	Zm00001d025706	Zm00001d025706_T003	0	126880549-126888834	126880549-126888843	1854	protein_coding	1	1
10	126880692	126880712	-	126880692	8	16	3UTR	Zm00001d025706	Zm00001d025706_T003	0	126880549-126888834	126880549-126888843	1854	protein_coding	21	3
10	126880745	126880792	-	126880792	7	28	3UTR	Zm00001d025706	Zm00001d025706_T003	0	126880549-126888834	126880549-126888843	1854	protein_coding	48	6
10	126884940	126884964	-	126884940	9	15	3UTR	Zm00001d025706	Zm00001d025706_T003	0	126880549-126888834	126880549-126888843	1854	protein_coding	25	3
10	126884989	126884989	-	126884989	3	3	3UTR	Zm00001d025706	Zm00001d025706_T003	0	126880549-126888834	126880549-126888843	1854	protein_coding	1	1
10	126885073	126885205	-	126885073	39	126	3UTR	Zm00001d025706	Zm00001d025706_T003	0	126880549-126888834	126880549-126888843	1854	protein_coding	133	14
10	126885383	126885383	-	126885383	4	4	3UTR	Zm00001d025706	Zm00001d025706_T003	0	126880549-126888834	126880549-126888843	1854	protein_coding	1	1
10	126885453	126885453	-	126885453	3	3	CDS	Zm00001d025706	Zm00001d025706_T003	0	126880549-126888834	126880549-126888843	1854	protein_coding	1	1
10	126885832	126885832	-	126885832	3	3	CDS	Zm00001d025706	Zm00001d025706_T003	0	126880549-126888834	126880549-126888843	1854	protein_coding	1	1
10	126887471	126887471	-	126887471	3	3	intron	Zm00001d025706	Zm00001d025706_T003	0	126880549-126888834	126880549-126888843	1854	protein_coding	1	1
10	126927632	126927632	-	126927632	8	8	extended	Zm00001d025709	Zm00001d025709_T001	3	126927635-126928758	126927635-126928758	672	protein_coding	1	1
10	126927711	126927711	-	126927711	3	3	3UTR	Zm00001d025709	Zm00001d025709_T001	0	126927635-126928758	126927635-126928758	672	protein_coding	1	1
10	126927860	126927863	-	126927860	3	6	3UTR	Zm00001d025709	Zm00001d025709_T001	0	126927635-126928758	126927635-126928758	672	protein_coding	4	2
10	126996685	126996705	-	126996705	15	21	extended	Zm00001d025711	Zm00001d025711_T001	223	126996928-126997912	126996928-126997912	0	protein_coding	21	2
10	126996735	126996735	-	126996735	4	4	extended	Zm00001d025711	Zm00001d025711_T001	193	126996928-126997912	126996928-126997912	0	protein_coding	1	1
10	126996842	126996842	-	126996842	14	14	extended	Zm00001d025711	Zm00001d025711_T001	86	126996928-126997912	126996928-126997912	0	protein_coding	1	1
10	126998459	126998712	-	126998620	184	1494	3UTR	Zm00001d025712	Zm00001d025712_T001	0	126998464-127005995	126998464-127006041	402	protein_coding	254	51
10	127000864	127000864	-	127000864	7	7	CDS	Zm00001d025712	Zm00001d025712_T001	0	126998464-127005995	126998464-127006041	402	protein_coding	1	1
10	127005293	127005294	-	127005293	5	8	intron	Zm00001d025712	Zm00001d025712_T001	0	126998464-127005995	126998464-127006041	402	protein_coding	2	2
10	127128791	127128811	-	127128792	32	121	extended	ENSRNA049463233	ENSRNA049463233-T1	8	127128800-127128917	127128800-127128917	0	snRNA	21	9
10	127154731	127154731	-	127154731	4	4	extended	Zm00001d025713	Zm00001d025713_T001	47	127154778-127159945	127154778-127159945	184	protein_coding	1	1
10	127154760	127154879	-	127154778	447	1097	3UTR	Zm00001d025713	Zm00001d025713_T001	0	127154778-127159945	127154778-127159945	184	protein_coding	120	30
10	127155841	127155861	-	127155861	11	23	intron	Zm00001d025713	Zm00001d025713_T001	0	127154778-127159945	127154778-127159945	184	protein_coding	21	4
10	127160231	127160248	-	127160244	8	18	extended	Zm00001d025714	Zm00001d025714_T001	45	127160289-127165558	127160289-127165558	266	protein_coding	18	4
10	127160285	127160289	-	127160289	75	87	3UTR	Zm00001d025714	Zm00001d025714_T001	0	127160289-127165558	127160289-127165558	266	protein_coding	5	3
10	127160314	127160382	-	127160363	65	177	3UTR	Zm00001d025714	Zm00001d025714_T001	0	127160289-127165558	127160289-127165558	266	protein_coding	69	8
10	127360540	127360567	-	127360562	322	390	3UTR	Zm00001d025717	Zm00001d025717_T001	0	127360555-127364032	127360555-127364032	518	protein_coding	28	6
10	127361074	127361074	-	127361074	5	5	3UTR	Zm00001d025717	Zm00001d025717_T001	0	127360555-127364032	127360555-127364032	518	protein_coding	1	1
10	127361145	127361166	-	127361145	10	24	3UTR	Zm00001d025717	Zm00001d025717_T001	0	127360555-127364032	127360555-127364032	518	protein_coding	22	3
10	127361192	127361206	-	127361192	4	7	3UTR	Zm00001d025717	Zm00001d025717_T001	0	127360555-127364032	127360555-127364032	518	protein_coding	15	2
10	127361267	127361267	-	127361267	9	9	CDS	Zm00001d025717	Zm00001d025717_T001	0	127360555-127364032	127360555-127364032	518	protein_coding	1	1
10	127363738	127363738	-	127363738	8	8	5UTR	Zm00001d025717	Zm00001d025717_T001	0	127360555-127364032	127360555-127364032	518	protein_coding	1	1
10	127517955	127517955	-	127517955	6	6	intergenic	Zm00001d025721	Zm00001d025721_T001	848	127518803-127520726	127518803-127520726	323	protein_coding	1	1
10	127518656	127518701	-	127518683	9	28	extended	Zm00001d025721	Zm00001d025721_T001	120	127518803-127520726	127518803-127520726	323	protein_coding	46	5
10	127518728	127519014	-	127518932	968	4838	3UTR	Zm00001d025721	Zm00001d025721_T001	0	127518803-127520726	127518803-127520726	323	protein_coding	287	81
10	127519116	127519116	-	127519116	4	4	3UTR	Zm00001d025721	Zm00001d025721_T001	0	127518803-127520726	127518803-127520726	323	protein_coding	1	1
10	127519405	127519405	-	127519405	3	3	intron	Zm00001d025721	Zm00001d025721_T001	0	127518803-127520726	127518803-127520726	323	protein_coding	1	1
10	127578090	127578090	-	127578090	4	4	intergenic	Zm00001d025723	Zm00001d025723_T001	6375	127571715-127575954	127571715-127575954	0	protein_coding	1	1
10	127667905	127667905	-	127667905	3	3	intergenic	Zm00001d025727	Zm00001d025727_T007	494	127668399-127678365	127668399-127678365	3462	protein_coding	1	1
10	127668427	127668506	-	127668461	10	53	3UTR	Zm00001d025727	Zm00001d025727_T007	0	127668399-127678365	127668399-127678365	3462	protein_coding	80	11
10	127671793	127671793	-	127671793	3	3	intron	Zm00001d025727	Zm00001d025727_T007	0	127668399-127678365	127668399-127678365	3462	protein_coding	1	1
10	127691034	127691046	-	127691046	4	10	intergenic	Zm00001d025727	Zm00001d025727_T007	22647	127668399-127678365	127668399-127678365	3462	protein_coding	13	3
10	127929332	127929332	-	127929332	4	4	intergenic	Zm00001d025738	Zm00001d025738_T001	27761	127957093-127963022	127957093-127963022	299	protein_coding	1	1
10	127948799	127948799	-	127948799	3	3	intergenic	Zm00001d025738	Zm00001d025738_T001	8294	127957093-127963022	127957093-127963022	299	protein_coding	1	1
10	127956991	127956991	-	127956991	4	4	extended	Zm00001d025738	Zm00001d025738_T001	102	127957093-127963022	127957093-127963022	299	protein_coding	1	1
10	127957043	127957062	-	127957043	10	15	extended	Zm00001d025738	Zm00001d025738_T001	50	127957093-127963022	127957093-127963022	299	protein_coding	20	2
10	127957099	127957181	-	127957111	63	249	3UTR	Zm00001d025738	Zm00001d025738_T001	0	127957093-127963022	127957093-127963022	299	protein_coding	83	13
10	127957234	127957234	-	127957234	17	17	3UTR	Zm00001d025738	Zm00001d025738_T001	0	127957093-127963022	127957093-127963022	299	protein_coding	1	1
10	128018383	128018383	-	128018383	4	4	intergenic	Zm00001d025739	Zm00001d025739_T004	3225	128021608-128027521	128021608-128027534	818	protein_coding	1	1
10	128019150	128019150	-	128019150	3	3	intergenic	Zm00001d025739	Zm00001d025739_T004	2458	128021608-128027521	128021608-128027534	818	protein_coding	1	1
10	128021608	128021621	-	128021621	17	23	3UTR	Zm00001d025739	Zm00001d025739_T004	0	128021608-128027521	128021608-128027534	818	protein_coding	14	2
10	128022477	128022505	-	128022501	8	14	intron	Zm00001d025739	Zm00001d025739_T004	0	128021608-128027521	128021608-128027534	818	protein_coding	29	3
10	128022590	128022599	-	128022595	56	129	intron	Zm00001d025739	Zm00001d025739_T004	0	128021608-128027521	128021608-128027534	818	protein_coding	10	7
10	128022662	128022677	-	128022677	10	14	intron	Zm00001d025739	Zm00001d025739_T004	0	128021608-128027521	128021608-128027534	818	protein_coding	16	2
10	128022708	128022741	-	128022718	138	187	intron	Zm00001d025739	Zm00001d025739_T004	0	128021608-128027521	128021608-128027534	818	protein_coding	34	10
10	128022815	128022815	-	128022815	4	4	3UTR	Zm00001d025739	Zm00001d025739_T004	0	128021608-128027521	128021608-128027534	818	protein_coding	1	1
10	128022952	128022952	-	128022952	3	3	intron	Zm00001d025739	Zm00001d025739_T004	0	128021608-128027521	128021608-128027534	818	protein_coding	1	1
10	128023908	128023908	-	128023908	4	4	3UTR	Zm00001d025739	Zm00001d025739_T004	0	128021608-128027521	128021608-128027534	818	protein_coding	1	1
10	128024016	128024043	-	128024031	82	349	3UTR	Zm00001d025739	Zm00001d025739_T004	0	128021608-128027521	128021608-128027534	818	protein_coding	28	16
10	128024138	128024172	-	128024167	7	27	3UTR	Zm00001d025739	Zm00001d025739_T004	0	128021608-128027521	128021608-128027534	818	protein_coding	35	5
10	128265706	128265706	-	128265706	17	17	extended	Zm00001d025745	Zm00001d025745_T001	52	128265758-128268623	128265758-128268623	245	protein_coding	1	1
10	128265734	128265913	-	128265861	381	1150	3UTR	Zm00001d025745	Zm00001d025745_T001	0	128265758-128268623	128265758-128268623	245	protein_coding	180	37
10	128266177	128266177	-	128266177	9	9	CDS	Zm00001d025745	Zm00001d025745_T001	0	128265758-128268623	128265758-128268623	245	protein_coding	1	1
10	128273075	128273150	-	128273093	33	92	3UTR	Zm00001d025747	Zm00001d025747_T002	0	128273093-128275437	128273093-128275437	520	protein_coding	76	7
10	128273182	128273188	-	128273183	42	63	3UTR	Zm00001d025747	Zm00001d025747_T002	0	128273093-128275437	128273093-128275437	520	protein_coding	7	5
10	128273606	128273606	-	128273606	15	15	3UTR	Zm00001d025747	Zm00001d025747_T002	0	128273093-128275437	128273093-128275437	520	protein_coding	1	1
10	128281397	128281470	-	128281446	33	89	extended	Zm00001d025749	Zm00001d025749_T002	297	128281743-128287294	128281743-128287294	0	protein_coding	74	10
10	128281575	128281580	-	128281575	6	15	extended	Zm00001d025749	Zm00001d025749_T002	168	128281743-128287294	128281743-128287294	0	protein_coding	6	3
10	128391688	128391724	-	128391724	22	62	3UTR	Zm00001d025752	Zm00001d025752_T002	0	128391683-128395889	128391683-128395889	381	protein_coding	37	5
10	128391749	128391758	-	128391749	16	27	3UTR	Zm00001d025752	Zm00001d025752_T002	0	128391683-128395889	128391683-128395889	381	protein_coding	10	2
10	128400711	128400739	-	128400711	11	33	extended	Zm00001d025753	Zm00001d025753_T001	1	128400712-128402032	128400712-128402032	296	protein_coding	29	5
10	128400765	128400765	-	128400765	13	13	3UTR	Zm00001d025753	Zm00001d025753_T001	0	128400712-128402032	128400712-128402032	296	protein_coding	1	1
10	128400817	128400847	-	128400836	21	59	3UTR	Zm00001d025753	Zm00001d025753_T001	0	128400712-128402032	128400712-128402032	296	protein_coding	31	6
10	128476492	128476492	-	128476492	12	12	intergenic	Zm00001d025753	Zm00001d025753_T001	75780	128400712-128402032	128400712-128402032	296	protein_coding	1	1
10	128476872	128476872	-	128476872	3	3	intergenic	Zm00001d025753	Zm00001d025753_T001	76160	128400712-128402032	128400712-128402032	296	protein_coding	1	1
10	128568441	128568441	-	128568441	8	8	intergenic	Zm00001d025756	Zm00001d025756_T002	6162	128574603-128578751	128574603-128578751	236	protein_coding	1	1
10	128568488	128568511	-	128568511	13	18	intergenic	Zm00001d025756	Zm00001d025756_T002	6092	128574603-128578751	128574603-128578751	236	protein_coding	24	2
10	128574629	128574644	-	128574629	5	14	3UTR	Zm00001d025756	Zm00001d025756_T002	0	128574603-128578751	128574603-128578751	236	protein_coding	16	3
10	128644601	128644694	-	128644611	257	781	3UTR	Zm00001d025761	Zm00001d025761_T002	0	128644589-128648111	128644589-128648111	297	protein_coding	94	26
10	128645886	128645886	-	128645886	3	3	intron	Zm00001d025761	Zm00001d025761_T002	0	128644589-128648111	128644589-128648111	297	protein_coding	1	1
10	128648005	128648005	-	128648005	4	4	5UTR	Zm00001d025761	Zm00001d025761_T002	0	128644589-128648111	128644589-128648111	297	protein_coding	1	1
10	128649619	128649644	-	128649624	8	27	extended	Zm00001d025762	Zm00001d025762_T001	297	128649921-128650496	128649921-128650496	0	protein_coding	26	5
10	128649702	128649775	-	128649712	257	1196	extended	Zm00001d025762	Zm00001d025762_T001	209	128649921-128650496	128649921-128650496	0	protein_coding	74	25
10	128651073	128651073	-	128651073	5	5	intergenic	Zm00001d025763	Zm00001d025763_T004	612	128651685-128657893	128651685-128657893	307	protein_coding	1	1
10	128934885	128934890	-	128934890	5	8	extended	Zm00001d025765	Zm00001d025765_T001	2	128934892-128936806	128934892-128936806	286	protein_coding	6	2
10	128934920	128934966	-	128934966	53	120	3UTR	Zm00001d025765	Zm00001d025765_T001	0	128934892-128936806	128934892-128936806	286	protein_coding	47	9
10	128934999	128935003	-	128935003	12	17	3UTR	Zm00001d025765	Zm00001d025765_T001	0	128934892-128936806	128934892-128936806	286	protein_coding	5	2
10	128935748	128935748	-	128935748	3	3	CDS	Zm00001d025765	Zm00001d025765_T001	0	128934892-128936806	128934892-128936806	286	protein_coding	1	1
10	128984675	128984675	-	128984675	3	3	extended	Zm00001d025767	Zm00001d025767_T001	20	128984695-128990744	128984695-128990744	879	protein_coding	1	1
10	128984702	128984938	-	128984778	550	2260	3UTR	Zm00001d025767	Zm00001d025767_T001	0	128984695-128990744	128984695-128990744	879	protein_coding	237	70
10	128985877	128985877	-	128985877	3	3	3UTR	Zm00001d025767	Zm00001d025767_T001	0	128984695-128990744	128984695-128990744	879	protein_coding	1	1
10	129098702	129098768	-	129098767	158	310	3UTR	Zm00001d025772	Zm00001d025772_T001	0	129098708-129101552	129098708-129101552	459	protein_coding	67	13
10	129098845	129099122	-	129098996	1238	7236	3UTR	Zm00001d025772	Zm00001d025772_T001	0	129098708-129101552	129098708-129101552	459	protein_coding	278	91
10	129119818	129119877	-	129119830	69	171	extended	Zm00001d025774	Zm00001d025774_T003	7	129119837-129135482	129119828-129135482	307	protein_coding	60	10
10	129119907	129119907	-	129119907	8	8	3UTR	Zm00001d025774	Zm00001d025774_T003	0	129119837-129135482	129119828-129135482	307	protein_coding	1	1
10	129119964	129119966	-	129119966	4	7	3UTR	Zm00001d025774	Zm00001d025774_T003	0	129119837-129135482	129119828-129135482	307	protein_coding	3	2
10	129239292	129239292	-	129239292	4	4	extended	Zm00001d025777	Zm00001d025777_T004	100	129239392-129245241	129239384-129245248	1195	protein_coding	1	1
10	129239345	129239529	-	129239492	659	1331	3UTR	Zm00001d025777	Zm00001d025777_T004	0	129239392-129245241	129239384-129245248	1195	protein_coding	185	34
10	129239560	129239650	-	129239603	228	804	3UTR	Zm00001d025777	Zm00001d025777_T004	0	129239392-129245241	129239384-129245248	1195	protein_coding	91	24
10	129239896	129239896	-	129239896	11	11	3UTR	Zm00001d025777	Zm00001d025777_T004	0	129239392-129245241	129239384-129245248	1195	protein_coding	1	1
10	129240276	129240276	-	129240276	3	3	3UTR	Zm00001d025777	Zm00001d025777_T004	0	129239392-129245241	129239384-129245248	1195	protein_coding	1	1
10	129240303	129240303	-	129240303	6	6	3UTR	Zm00001d025777	Zm00001d025777_T004	0	129239392-129245241	129239384-129245248	1195	protein_coding	1	1
10	129244579	129244579	-	129244579	6	6	intron	Zm00001d025777	Zm00001d025777_T004	0	129239392-129245241	129239384-129245248	1195	protein_coding	1	1
10	129638411	129638411	-	129638411	4	4	intergenic	zma-MIR156h	zma-mir156h	4459	129642870-129642984	129642870-129642984	0	miRNA	1	1
10	129638983	129639002	-	129639002	6	9	intergenic	zma-MIR156h	zma-mir156h	3868	129642870-129642984	129642870-129642984	0	miRNA	20	2
10	129639296	129639296	-	129639296	4	4	intergenic	zma-MIR156h	zma-mir156h	3574	129642870-129642984	129642870-129642984	0	miRNA	1	1
10	129641534	129641534	-	129641534	5	5	intergenic	zma-MIR156h	zma-mir156h	1336	129642870-129642984	129642870-129642984	0	miRNA	1	1
10	129641561	129641561	-	129641561	3	3	intergenic	zma-MIR156h	zma-mir156h	1309	129642870-129642984	129642870-129642984	0	miRNA	1	1
10	129641633	129641633	-	129641633	3	3	intergenic	zma-MIR156h	zma-mir156h	1237	129642870-129642984	129642870-129642984	0	miRNA	1	1
10	129641677	129641677	-	129641677	14	14	intergenic	zma-MIR156h	zma-mir156h	1193	129642870-129642984	129642870-129642984	0	miRNA	1	1
10	129641707	129641707	-	129641707	3	3	intergenic	zma-MIR156h	zma-mir156h	1163	129642870-129642984	129642870-129642984	0	miRNA	1	1
10	129641737	129641739	-	129641737	3	6	intergenic	zma-MIR156h	zma-mir156h	1133	129642870-129642984	129642870-129642984	0	miRNA	3	2
10	129641771	129641806	-	129641793	12	33	intergenic	zma-MIR156h	zma-mir156h	1077	129642870-129642984	129642870-129642984	0	miRNA	36	6
10	129673371	129673371	-	129673371	3	3	extended	Zm00001d025788	Zm00001d025788_T001	156	129673527-129674867	129673527-129674867	0	protein_coding	1	1
10	129676568	129676568	-	129676568	7	7	extended	Zm00001d025789	Zm00001d025789_T001	54	129676622-129683792	129676622-129683792	522	protein_coding	1	1
10	129676617	129676794	-	129676718	137	606	3UTR	Zm00001d025789	Zm00001d025789_T001	0	129676622-129683792	129676622-129683792	522	protein_coding	178	30
10	129676998	129677010	-	129677010	5	8	3UTR	Zm00001d025789	Zm00001d025789_T001	0	129676622-129683792	129676622-129683792	522	protein_coding	13	2
10	129873992	129873992	-	129873992	5	5	intergenic	Zm00001d025796	Zm00001d025796_T001	44678	129829314-129830251	129829314-129830251	0	protein_coding	1	1
10	129946782	129946782	-	129946782	10	10	intergenic	Zm00001d025801	Zm00001d025801_T002	66734	130013516-130019645	130013516-130019645	357	protein_coding	1	1
10	130013480	130013638	-	130013515	502	1463	extended	Zm00001d025801	Zm00001d025801_T002	1	130013516-130019645	130013516-130019645	357	protein_coding	159	30
10	130013673	130013779	-	130013686	394	1217	3UTR	Zm00001d025801	Zm00001d025801_T002	0	130013516-130019645	130013516-130019645	357	protein_coding	107	32
10	130013806	130013806	-	130013806	4	4	3UTR	Zm00001d025801	Zm00001d025801_T002	0	130013516-130019645	130013516-130019645	357	protein_coding	1	1
10	130018842	130018842	-	130018842	3	3	intron	Zm00001d025801	Zm00001d025801_T002	0	130013516-130019645	130013516-130019645	357	protein_coding	1	1
10	130019334	130019334	-	130019334	15	15	5UTR	Zm00001d025801	Zm00001d025801_T002	0	130013516-130019645	130013516-130019645	357	protein_coding	1	1
10	130019406	130019406	-	130019406	3	3	5UTR	Zm00001d025801	Zm00001d025801_T002	0	130013516-130019645	130013516-130019645	357	protein_coding	1	1
10	130074136	130074136	-	130074136	3	3	intergenic	Zm00001d025805	Zm00001d025805_T003	29540	130103676-130106438	130103676-130106438	225	protein_coding	1	1
10	130123460	130123460	-	130123460	4	4	extended	Zm00001d025807	Zm00001d025807_T001	205	130123665-130125293	130123665-130125293	0	protein_coding	1	1
10	130123487	130123487	-	130123487	4	4	extended	Zm00001d025807	Zm00001d025807_T001	178	130123665-130125293	130123665-130125293	0	protein_coding	1	1
10	130145457	130145463	-	130145457	5	9	extended	Zm00001d025808	Zm00001d025808_T001	7	130145464-130148492	130145464-130148492	316	protein_coding	7	2
10	130145549	130145555	-	130145549	19	27	3UTR	Zm00001d025808	Zm00001d025808_T001	0	130145464-130148492	130145464-130148492	316	protein_coding	7	2
10	130146470	130146470	-	130146470	3	3	intron	Zm00001d025808	Zm00001d025808_T001	0	130145464-130148492	130145464-130148492	316	protein_coding	1	1
10	130146511	130146514	-	130146511	4	7	intron	Zm00001d025808	Zm00001d025808_T001	0	130145464-130148492	130145464-130148492	316	protein_coding	4	2
10	130146572	130146597	-	130146597	7	18	intron	Zm00001d025808	Zm00001d025808_T001	0	130145464-130148492	130145464-130148492	316	protein_coding	26	4
10	130146627	130146645	-	130146639	6	12	intron	Zm00001d025808	Zm00001d025808_T001	0	130145464-130148492	130145464-130148492	316	protein_coding	19	3
10	130257217	130257217	-	130257217	5	5	extended	Zm00001d025812	Zm00001d025812_T001	210	130257427-130259239	130257427-130259239	0	protein_coding	1	1
10	130257301	130257331	-	130257331	18	43	extended	Zm00001d025812	Zm00001d025812_T001	96	130257427-130259239	130257427-130259239	0	protein_coding	31	5
10	130257384	130257384	-	130257384	3	3	extended	Zm00001d025812	Zm00001d025812_T001	43	130257427-130259239	130257427-130259239	0	protein_coding	1	1
10	130399886	130399967	-	130399898	208	746	extended	Zm00001d025816	Zm00001d025816_T007	3	130399901-130438506	130399900-130438506	429	protein_coding	82	20
10	130400073	130400089	-	130400089	40	43	3UTR	Zm00001d025816	Zm00001d025816_T007	0	130399901-130438506	130399900-130438506	429	protein_coding	17	2
10	130400117	130400117	-	130400117	4	4	3UTR	Zm00001d025816	Zm00001d025816_T007	0	130399901-130438506	130399900-130438506	429	protein_coding	1	1
10	130400142	130400205	-	130400186	28	38	3UTR	Zm00001d025816	Zm00001d025816_T007	0	130399901-130438506	130399900-130438506	429	protein_coding	64	4
10	130410514	130410514	-	130410514	3	3	CDS	Zm00001d025816	Zm00001d025816_T007	0	130399901-130438506	130399900-130438506	429	protein_coding	1	1
10	130417037	130417037	-	130417037	15	15	intron	Zm00001d025816	Zm00001d025816_T007	0	130399901-130438506	130399900-130438506	429	protein_coding	1	1
10	130522270	130522270	-	130522270	4	4	intergenic	Zm00001d025817	Zm00001d025817_T003	185	130522455-130537454	130522455-130537454	379	protein_coding	1	1
10	130522514	130522559	-	130522530	92	163	3UTR	Zm00001d025817	Zm00001d025817_T003	0	130522455-130537454	130522455-130537454	379	protein_coding	46	13
10	130522605	130522614	-	130522614	6	9	3UTR	Zm00001d025817	Zm00001d025817_T003	0	130522455-130537454	130522455-130537454	379	protein_coding	10	2
10	130522651	130522726	-	130522701	146	356	3UTR	Zm00001d025817	Zm00001d025817_T003	0	130522455-130537454	130522455-130537454	379	protein_coding	76	19
10	130522786	130522786	-	130522786	3	3	3UTR	Zm00001d025817	Zm00001d025817_T003	0	130522455-130537454	130522455-130537454	379	protein_coding	1	1
10	130624152	130624152	-	130624152	3	3	intergenic	Zm00001d025819	Zm00001d025819_T001	162	130624314-130626396	130624314-130626396	234	protein_coding	1	1
10	130624246	130624265	-	130624265	9	12	extended	Zm00001d025819	Zm00001d025819_T001	49	130624314-130626396	130624314-130626396	234	protein_coding	20	2
10	130624392	130624410	-	130624405	17	53	3UTR	Zm00001d025819	Zm00001d025819_T001	0	130624314-130626396	130624314-130626396	234	protein_coding	19	4
[truncated: 93,346 more rows]
